# Supplementary material
Source: publisher site journal article supplement (https://italianbotanist.pensoft.net/article/24546/download/suppl/31/)
Supplement: Supplementary file 1

**Supplementary data**

**1.** Monviso and the head of Po Valley.

**2.** Collection sites displayed on the Geological map of Italy (scale 1:100,000). For detailed code of each site see Suppl. material 1: 5.

**3.1.** Temperature and rainfall data for the weather station of Paesana (1,265 m a.s.l.) in the period 1993-2017.

**3.2.** Temperature and rainfall data for the weather station of Crissolo (1,342 m a.s.l.) in the period 2012-2017.

**3.3.** Snowfall data for the weather stations of Paesana (1,265 m a.s.l.) and Pian Giasset (2,150 m a.s.l.) in the period 2002-2017.

**4.** The 34 participants to the field trip of the working group for Floristics, Systematics and Evolution of the Italian Botanical Society from 9 to 12 July 2014 together with the staff of the “Parco del Monviso”.

**5.** List of collecting sites, with reference number, date of collection, placename with short description, altitude, main habitats, cartographic coordinates (expressed using UTM projection, ED50 geodetic system, zone 32T), number of *exsiccata* collected for each site. For detailed topographic map see figure 1.

**6.** Public *herbaria* and private collections in which the *exsiccata* collected are kept. Acronyms of public collections refer to Thiers (2017); in the column on the right number of *exsiccata* kept in each collection.

**7.** Floristic list of taxa observed at the head of the Po Valley (Piedmont, province of Cuneo) with reference number of collecting site and *herbaria* collections (in brackets). For detailed code of each site and *herbaria* see Suppl. material 1: 5, 6.


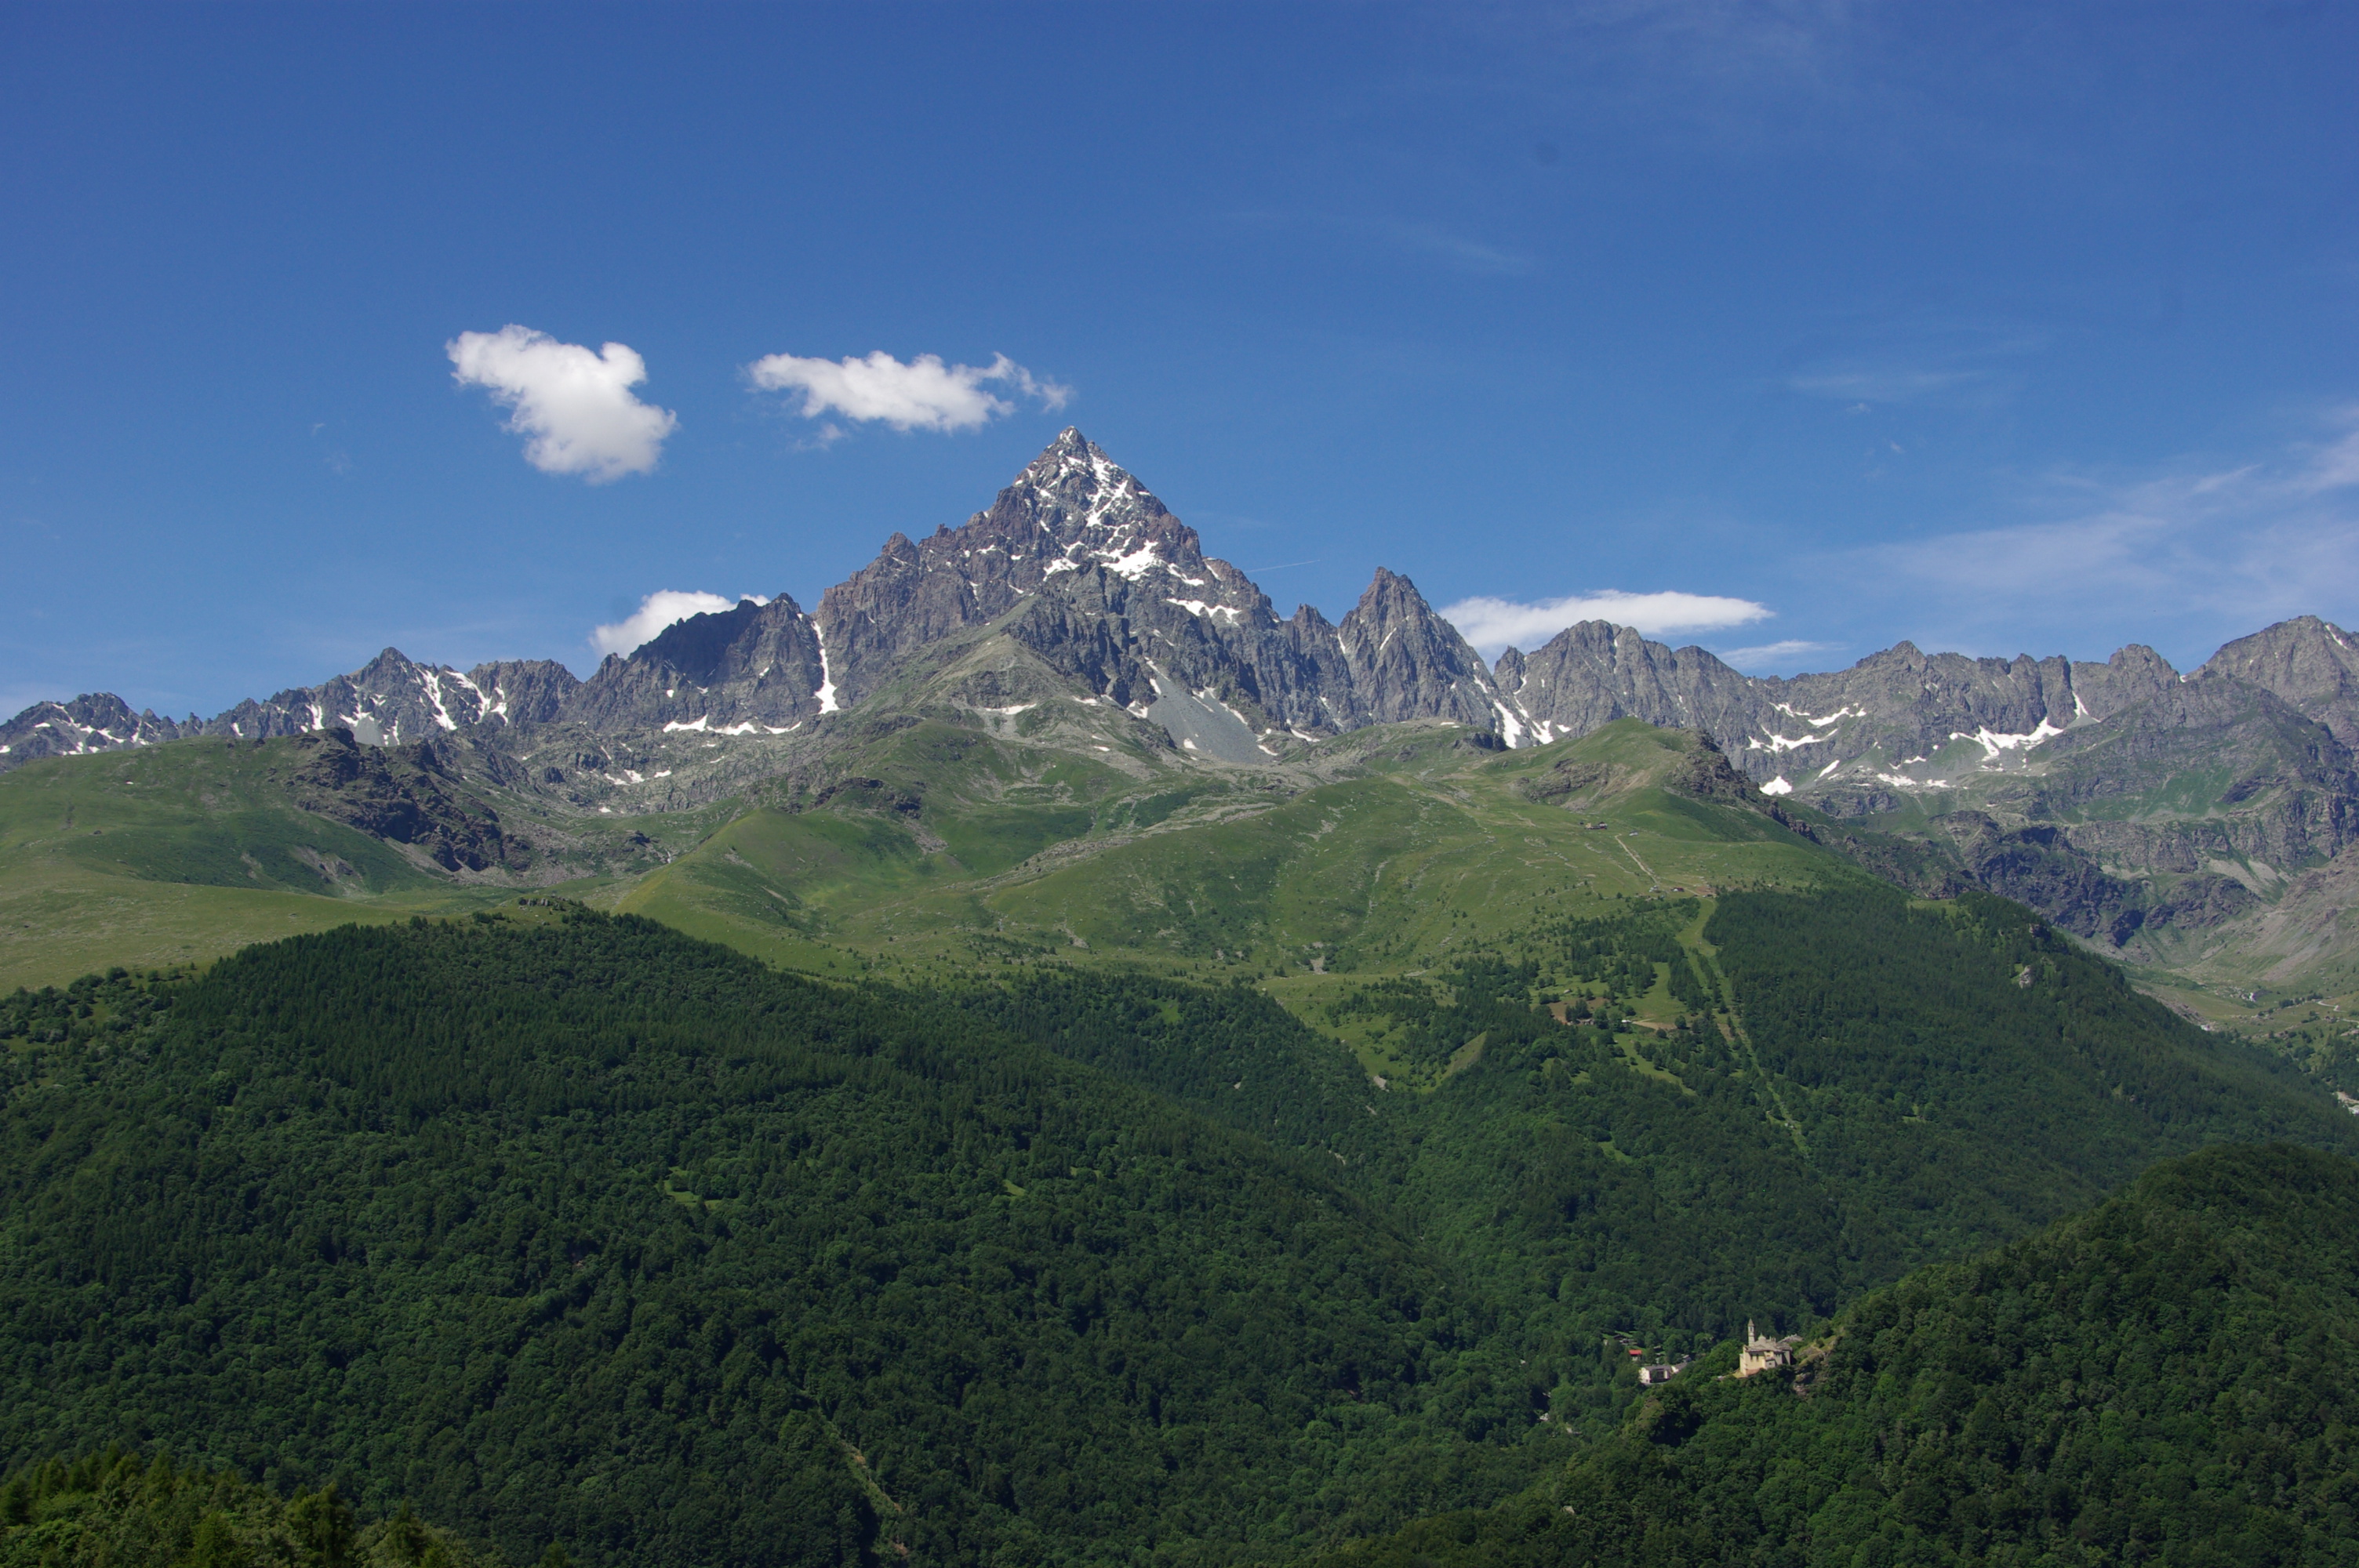


**1.** Monviso and the head of Po Valley (from Serre Superiore, upstream Ostana, July 11, 2014, photo by A. Pistarino).


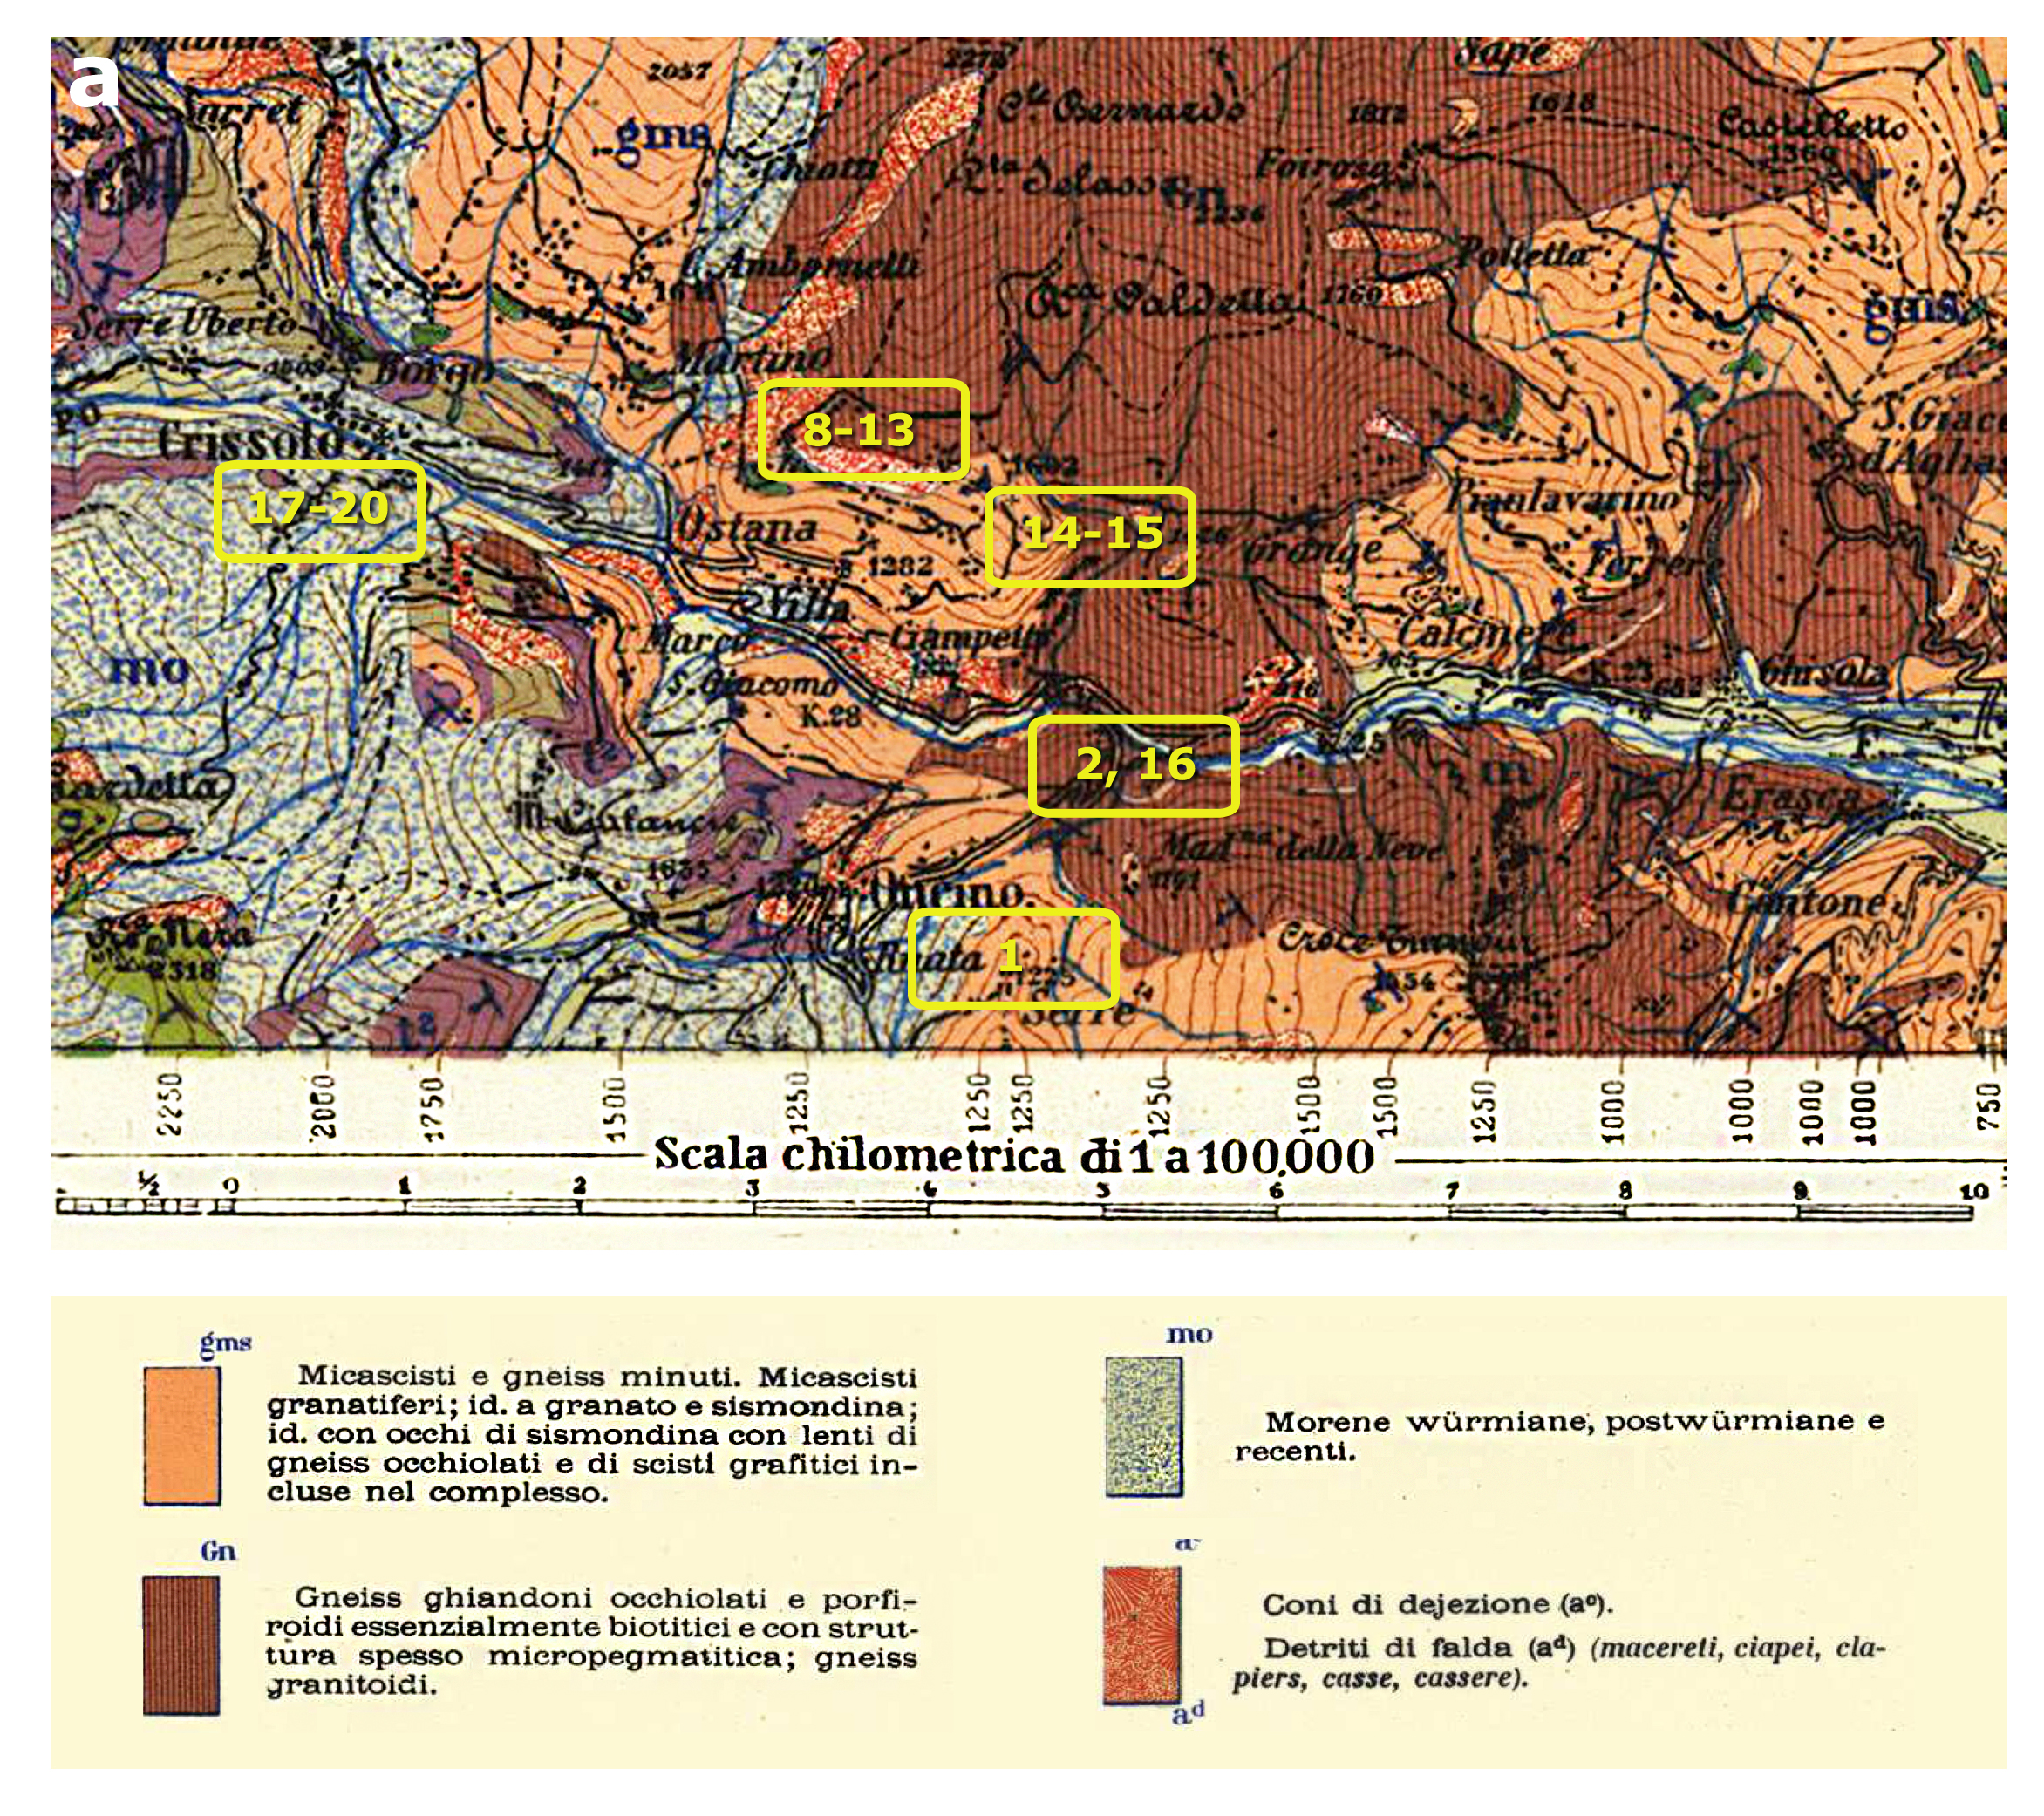


**2.** Collection sites displayed on the Geological map of Italy (scale 1:100,000). For detailed code of each site see Suppl. material 1: 5.

**a.** Leaf 67 (Pinerolo); the lithologies of collection sites n. 1, 2, 8 to 13, 14 to 16 are related to Dora-Maira Massif:

- n. 1: Oncino, between the hamlets of Ruata and Serre: micaschists and minute gneisses (gms), wurmian, postwurmian and recent morainic deposits (mo)

- n. 2, n. 16: Oncino-Paesana, the Laita bridge over the Po River: occhiadine gneisses (Gn)

- n. 8 to n. 13: Ostana, hamlet of Serre and Meire (huts) Durandini: debris and debris cones (ac, ad), micaschists and minute gneisses (gms), occhiadine gneisses (Gn)

- n. 14, n. 15: Ostana, hamlet of Bernardi: micaschists and minute gneisses (gms), occhiadine gneisses (Gn)

- n. 17 to n. 20: Crissolo, track to Pian Giasset: wurmian, postwurmian and recent morainic deposits (mo).


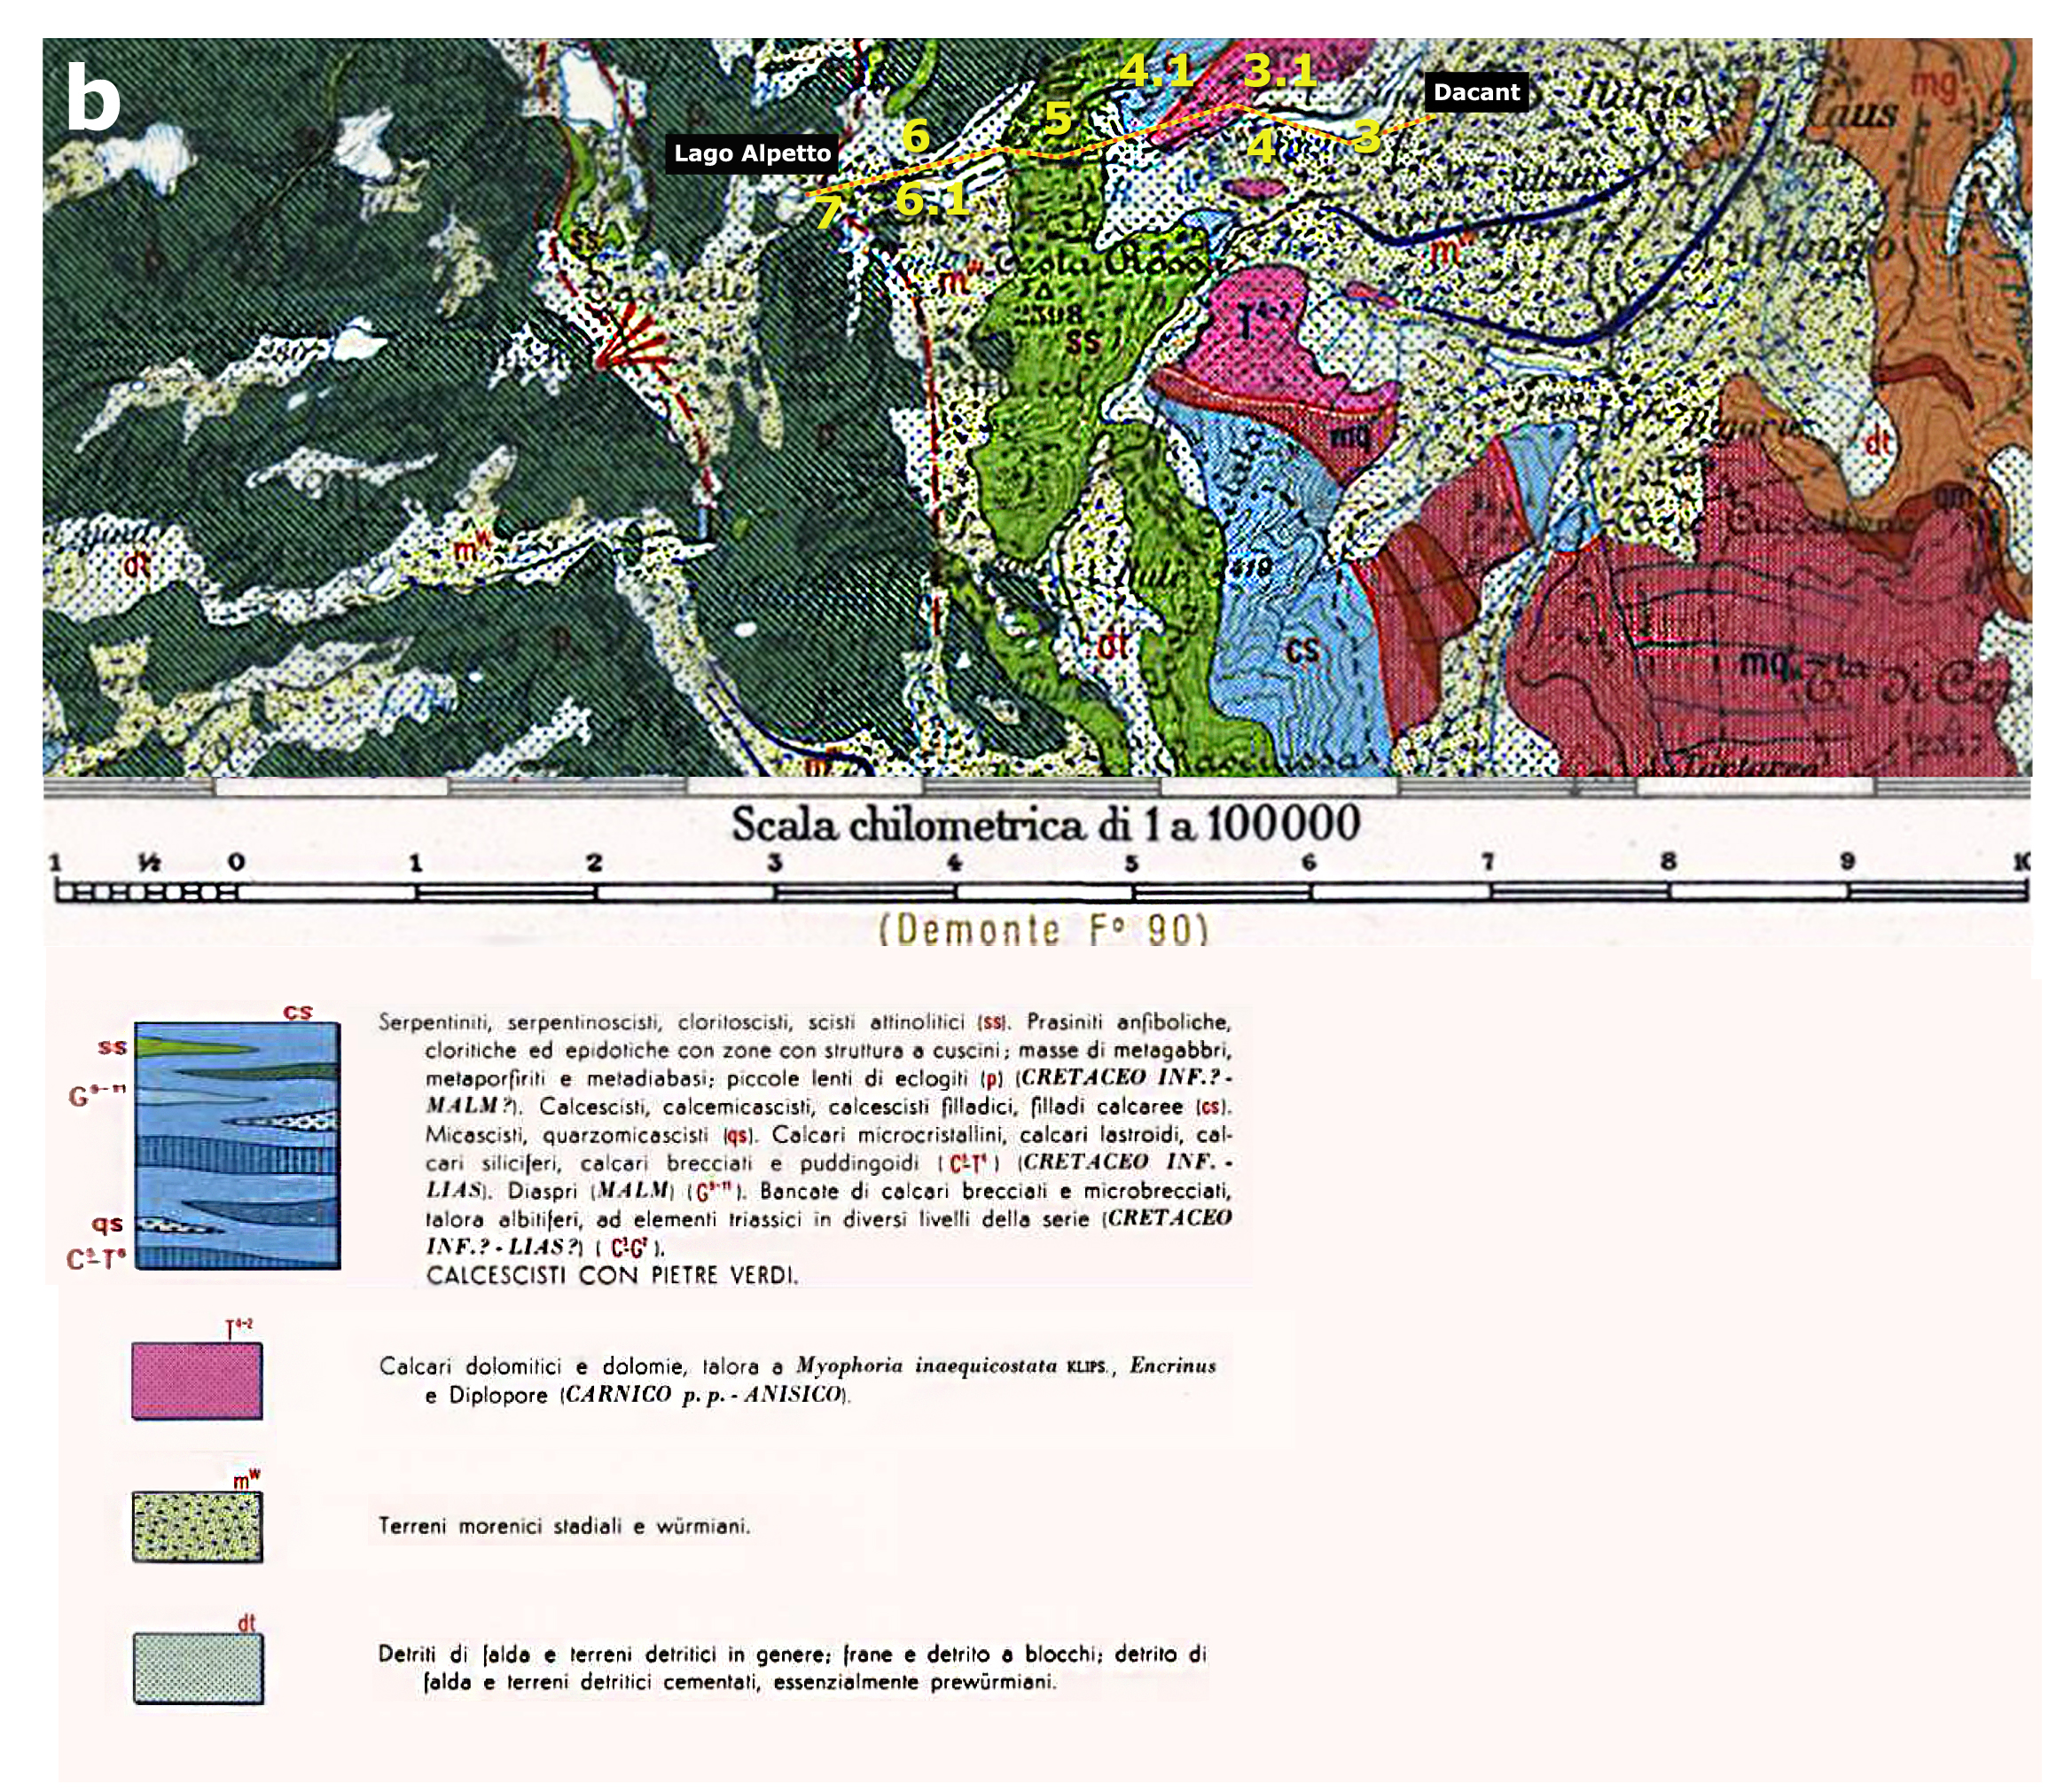


**b.** Leaf 78-79 (Argentera-Dronero): the lithologies of sites n. 3 to n.7 in Alpetto Valley are related to “Complex of calcschists with ophiolites”:

- n. 3 to n. 7: Oncino, Alpetto valley, from Meire (huts) Dacant (1,610 m a.s.l.) to the Alpetto Lake (2,260 m a.s.l.): morainic stadial and wurmian terrain (mw), limestone-dolomitic rocks and dolomias (T4-2), calcschists (cs), serpentinites, serpentinoschists ecc. (ss), amphibolic prasinites ecc. (p), debris (dt).

From: Geological map of Italy (scale 1:100,000): Leaf 67 Pinerolo (reprint Morganti 1951), Leaf 78-79 Argentera-Dronero (coord. Malaroda 1971), Italian Geological Service, Rome.


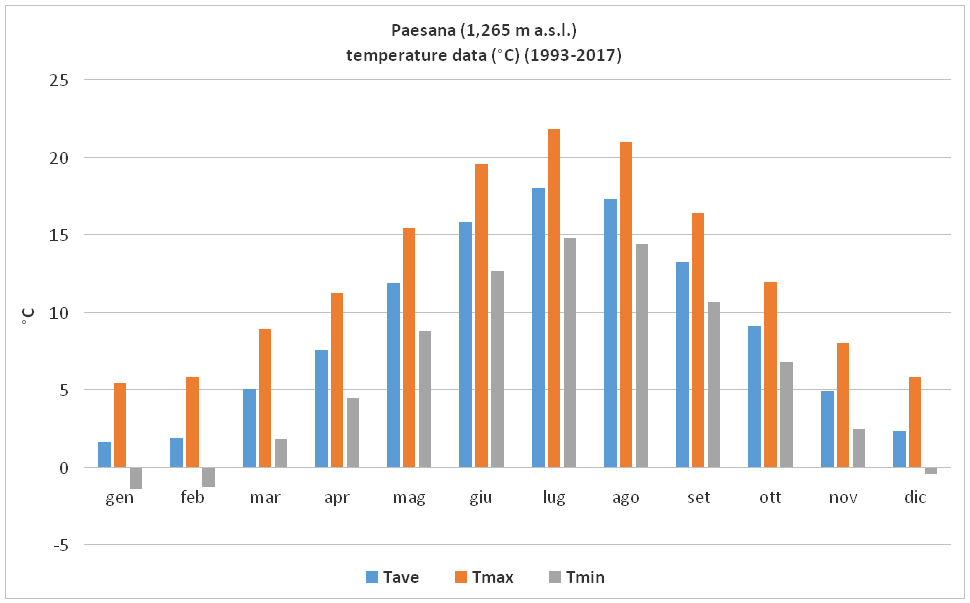


a)


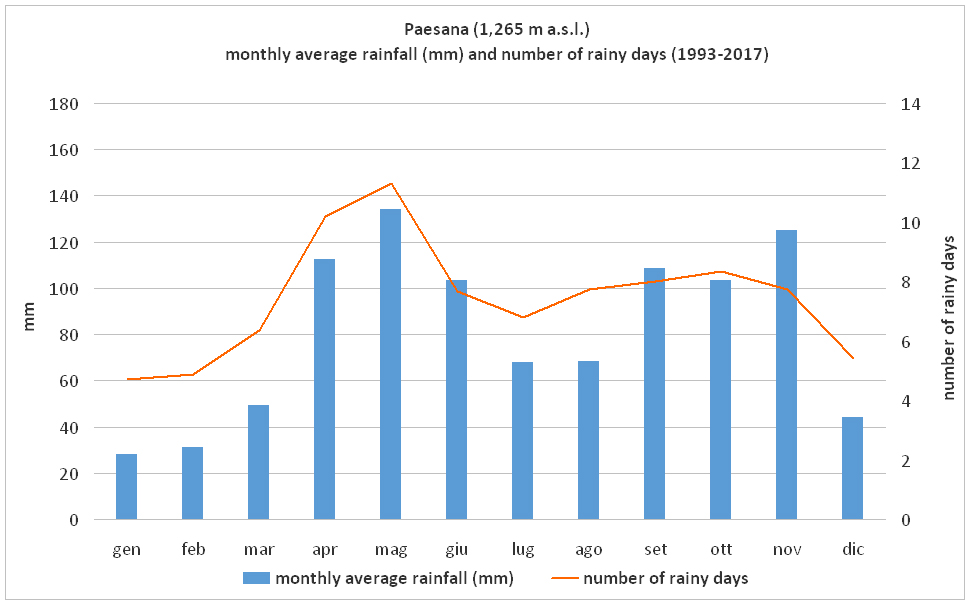


b)

**3.1.** Temperature and rainfall data for the weather station of Paesana (1,265 m a.s.l.) in the period 1993-2017:

a) temperature data (average, maximum and minimum expressed in °C)

b) rainfall data (monthly average expressed in mm and number of rainy days).

Data provided by ARPA Piemonte.


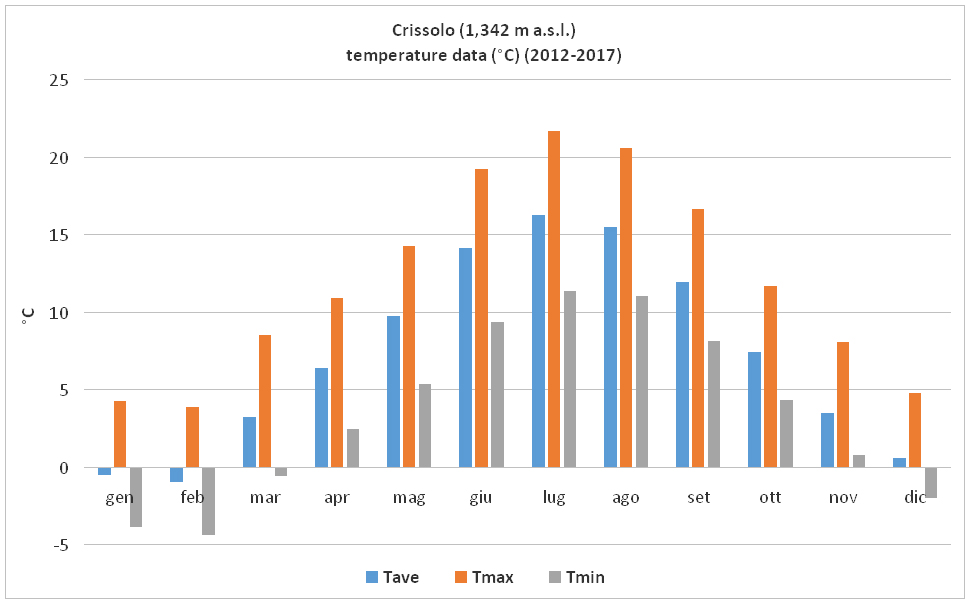


a)


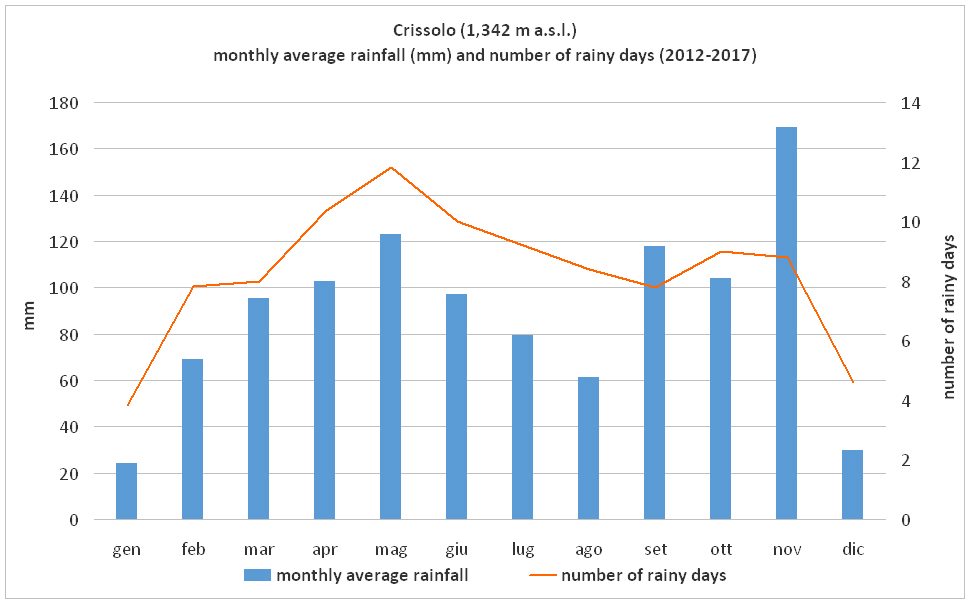


b)

**3.2.** Temperature and rainfall data for the weather station of Crissolo (1,342 m a.s.l.) in the period 2012-2017:

a) temperature data (average, maximum and minimum expressed in °C)

b) rainfall data (monthly average expressed in mm and number of rainy days).

Data provided by ARPA Piemonte.


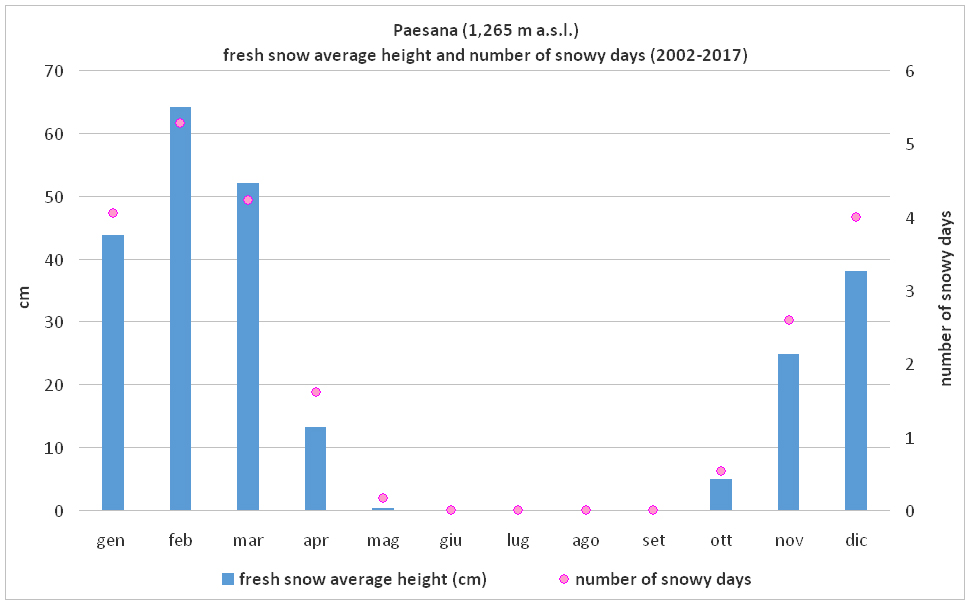


a)


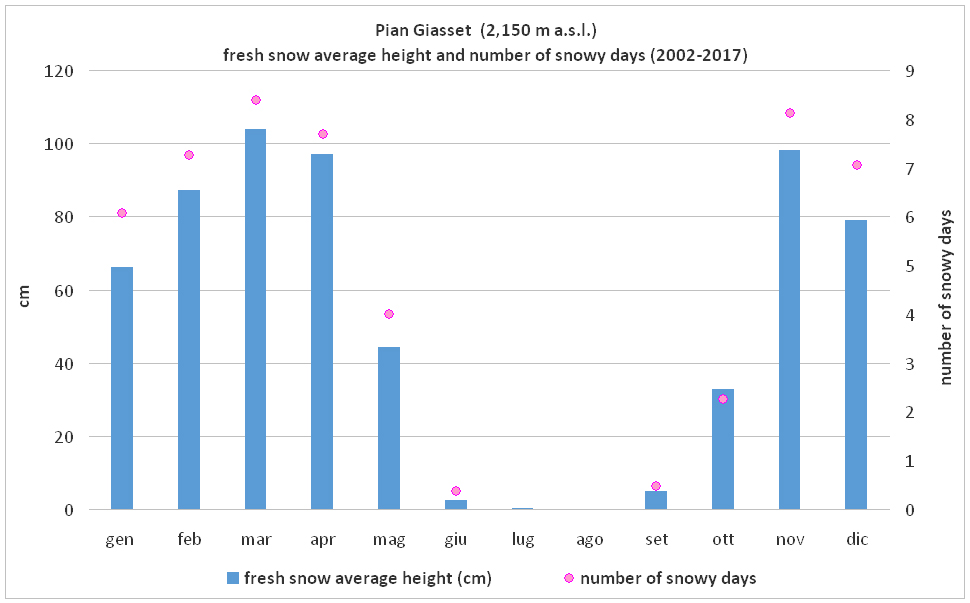


b)

**3.3.** Snowfall data (fresh snow average height expressed in cm and number of snowy days) in the period 2002-2017:

a) for the weather station of Paesana (1,265 m a.s.l.)

b) for the weather station of Pian Giasset (2,150 m a.s.l.), in Crissolo municipality

Data provided by ARPA Piemonte.


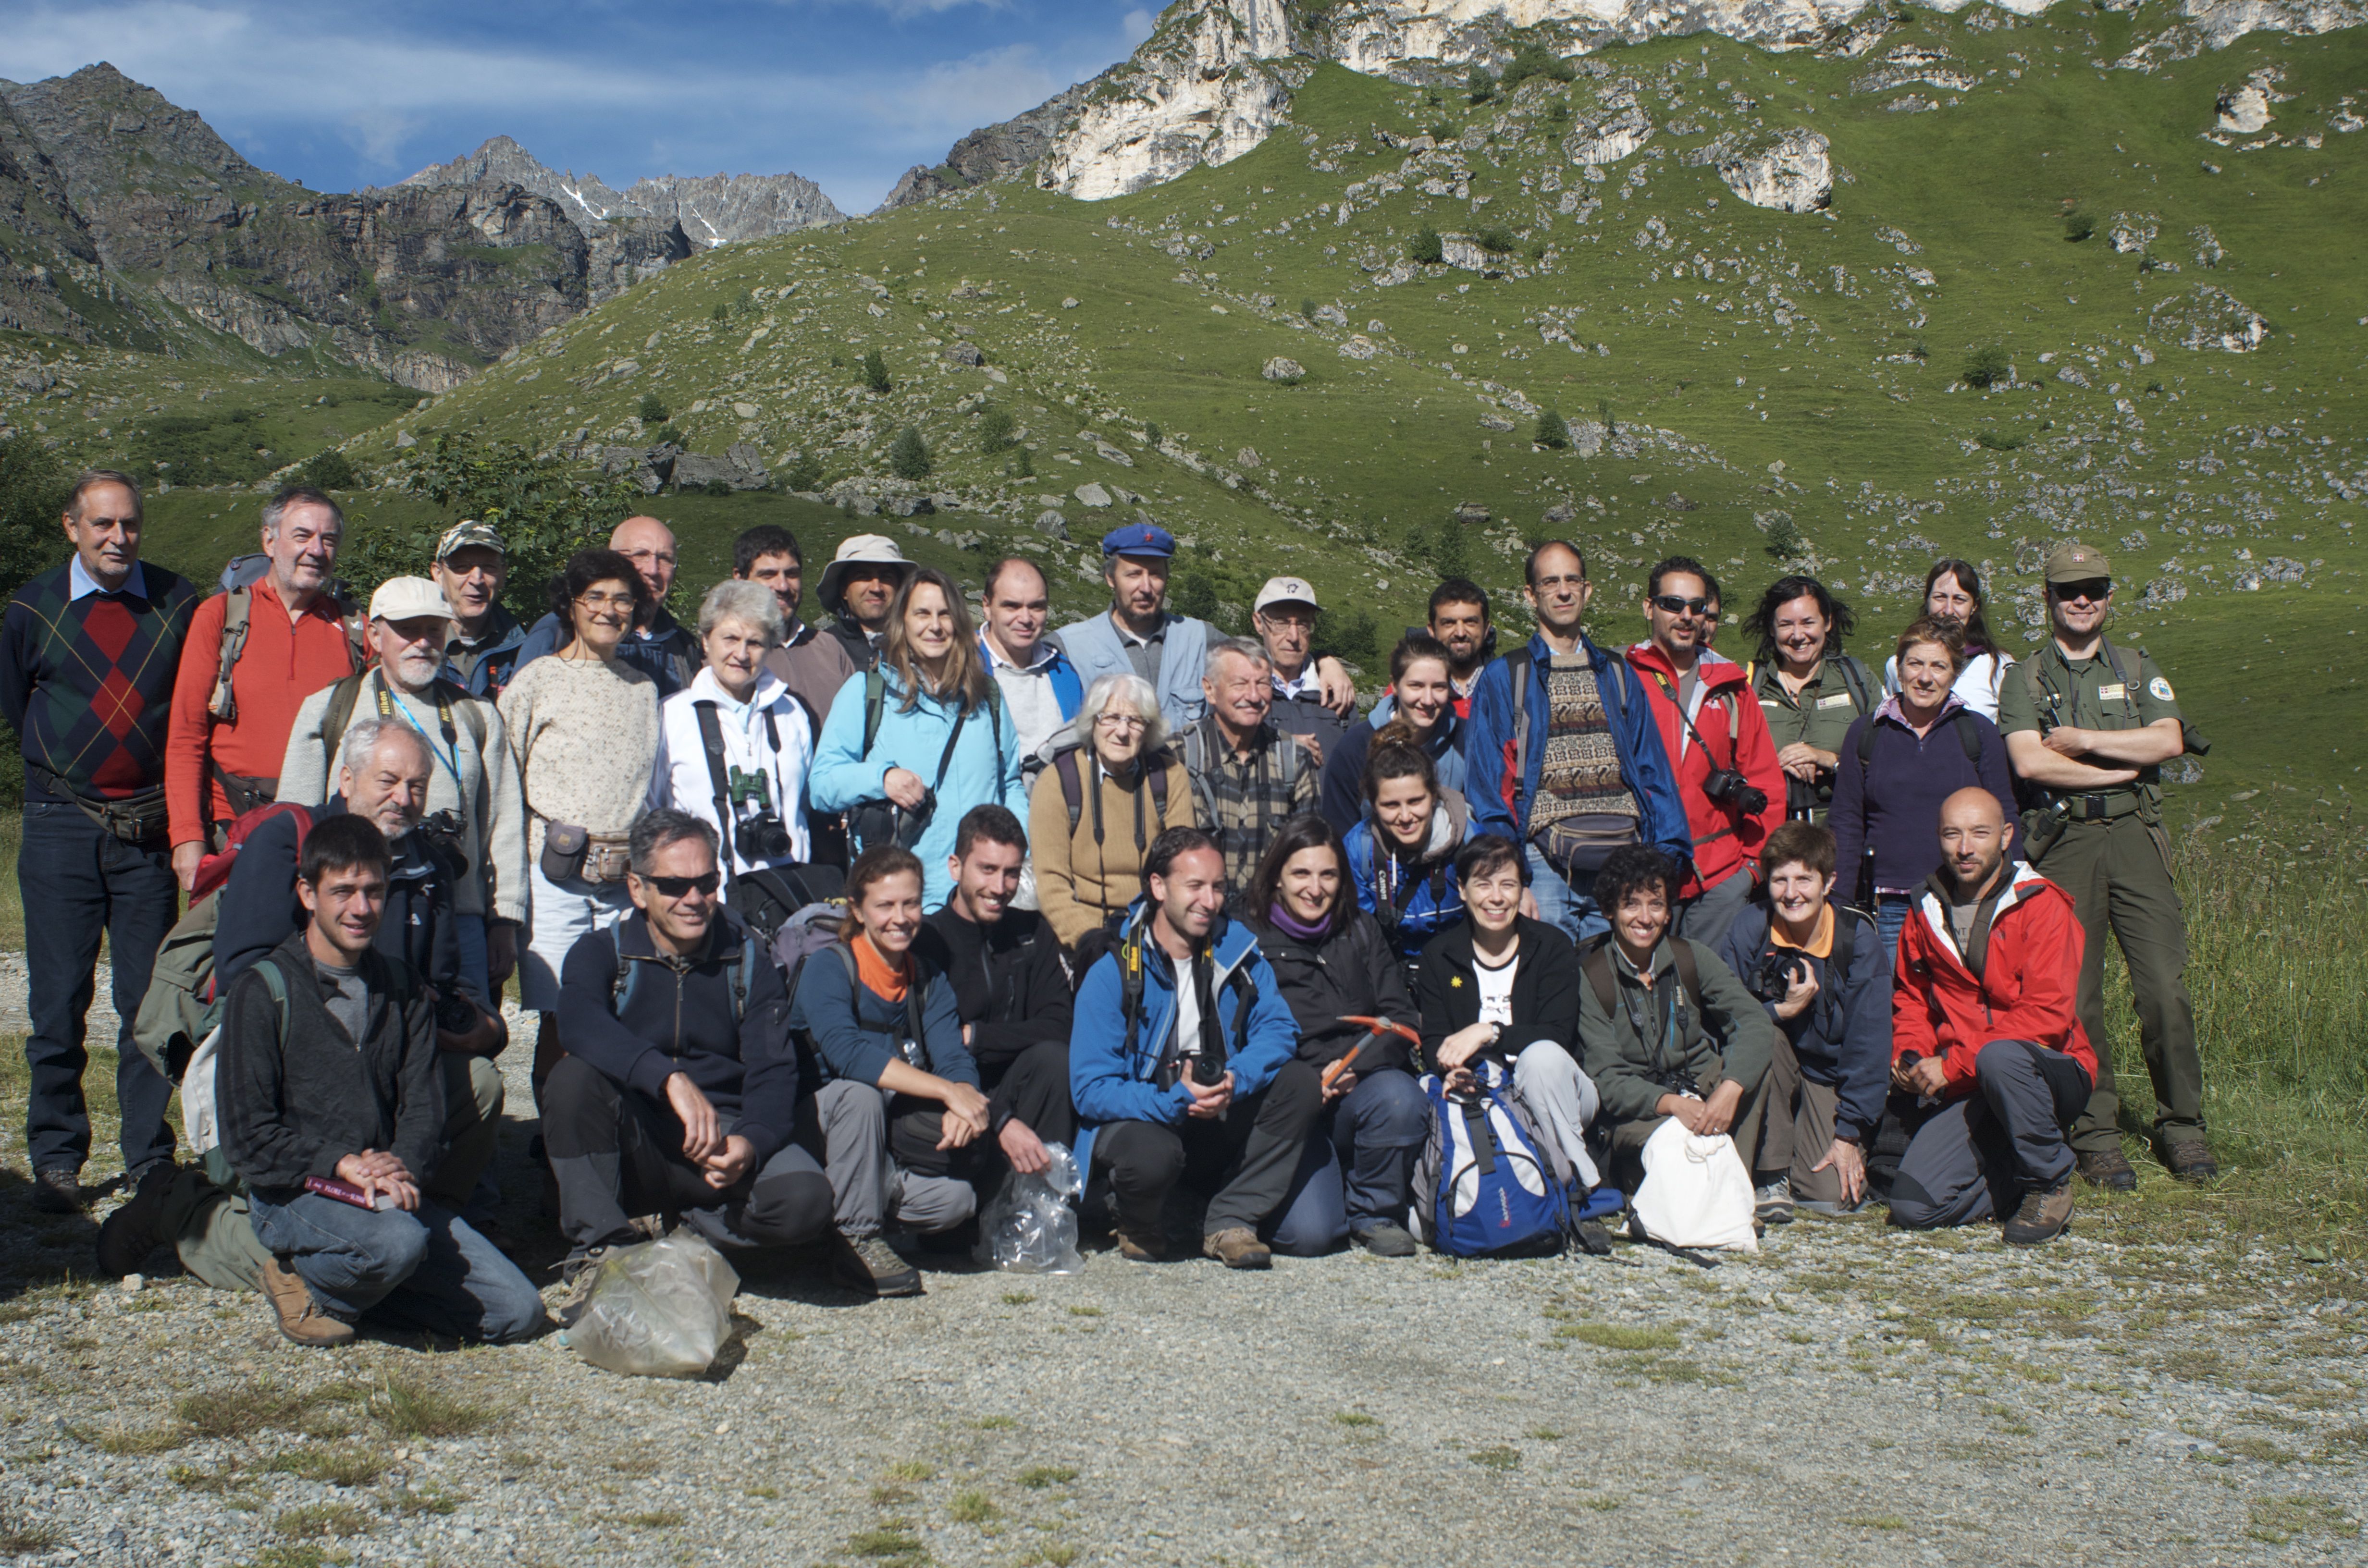


**4.** The 34 participants to the field trip of the working group for Floristics, Systematics and Evolution of the Italian Botanical Society, together with the staff of the “Parco del Monviso” (Annalisa Rebecchi and Marco Rastelli) (Alpetto Valley, July 10, 2014, photo by L. Rosati).

| N. | DAY | LOCALITY | ALTITUDE (m a.s.l.) | HABITAT | UTM X | UTM Y | N. EXS. |
| --- | --- | --- | --- | --- | --- | --- | --- |
| 1 | 9/7/2014 | Oncino, between hamlet of Ruata and hamlet of Serre; Savoia bridge over the Lenta stream | 1110 | Mixed deciduous forest; wet grassland | 356906 | 4947636 | 321 |
| 2 | Oncino, Rocca Bruenta; first hairpin bend upstream Laita bridge over the Po River | 896-910 | Siliceous cliff; roadside | 358048 | 4949759 | 273 |
| 3 | 10/7/2014 | Oncino, Alpetto Valley, Meire (huts) Dacant; path to the Alpetto Lake, right orographic side | 1610-1670 | Mixed deciduous forest alternating to pasture; shrub; pasture; grassland | 354492 | 4947459 | 443 |
| 3.1 | Oncino, Alpetto Valley; left orographic side, Rocca Bianca face | 1850-1870 | Calcareous cliff | 354192 | 4947642 | 114 |
| 4 | Oncino, Alpetto Valley; path to the Alpetto Lake, right orographic side, from mixed wood to Alpetto stream crossing | 1670-1720 | Pasture; stream edges | 354196 | 4947264 | 290 |
| 4.1 | Oncino, Alpetto Valley; left orographic side, the base of the Rocca Bianca face | 1680-1800 | Debris, screes; pasture on calcareous substrate | 353973 | 4947529 | 201 |
| 5 | Oncino, Alpetto Valley: path to the Alpetto Lake, left orographic side | 1850-1900 | Pasture on siliceous substrate | 353359 | 4947322 | 312 |
| 6 | Oncino, Alpetto Valley; path to the Alpetto Lake, left orographic side, along the waterfall of the Alpetto stream | 1900-2200 | Pasture with outcropping rock and cliff | 352708 | 4947406 | 218 |
| 6.1 | Oncino, Alpetto Valley; left orographic side, at the base of the waterfall of the Alpetto stream | 1850-1900 | Pasture | 353316 | 4947204 | 9 |
| 7 | Oncino, Alpetto Valley; path to the Alpetto Lake, glacial plateau upstream “Gruppo di Alpetto” | 2200-2260 | Wet grassland and tall herbs | 351967 | 4946943 | 104 |
| 8 | 11/7/2014 | Ostana, Pian dei Ciarm, upstream of the hamlet of Meire Durandini | 1630-1680 | Pasture on siliceous substrate | 357393 | 4951496 | 314 |
| 8.1 | Ostana, Pian dei Ciarm, upstream of the hamlet of Meire Durandini. | 1630 | Wet area, spring | 357508 | 4951405 | 25 |
| 9 | Ostana, hamlet of Serre Superiore; captation of the aqueduct | 1520-1550 | Wet grassland | 356447 | 4951677 | 177 |
| 10 | Ostana, hamlet of Serre Superiore; upstream Bergeria (hut) del Serre and upstream of captation of the aqueduct | 1550-1600 | Pasture on siliceous substrate | 356559 | 4951611 | 3 |
| 12 | Ostana, hamlet of Serre Superiore | 1520-1570 | Pingue grassland | 356621 | 4951409 | 57 |
| 13 |  | Ostana, hamlet of Serre Superiore | 1570-1580 | Wet grassland | 357040 | 4951307 | 44 |
| 13.1 | Ostana, hamlet of Serre Superiore | 1550-1570 | Mixed deciduous forest with prevalence of *Laburnum* sp. | 356804 | 4951311 | 43 |
| 14 | Ostana, hamlet of Bernardi; San Nicolao Chapel, car parking | 1412 | Open space with embanked soil | 357577 | 4950437 | 32 |
| 14.1 | Ostana, hamlet of Bernardi; fountain | 1415 | Wetland area near the fountain | 357392 | 4950548 | 6 |
| 15 | Ostana, hamlet of Bernardi; Sentiero dei Morti (Path of the dead), right orographic side of the Laita stream | 1412-1450 | Mixed deciduous forest | 357819 | 4950636 | 154 |
| 16 | Paesana, at the border with Ostana, crossroads to Oncino; close to the Laita bridge, left orographic side of the Po River, above the provincial road n. 26 | 795-800 | Chestnut wood | 358033 | 4949896 | 102 |
| N. | DAY | LOCALITY | ALTITUDE (m a.s.l.) | HABITAT | UTM X | UTM Y | N. EXS. |
| 17 | 12/7/2014 | Crissolo, downstream Meire (huts) Giaromba; dirt road between provincial road n. 26 and bridge over the Po River | 1535-1545 | Pasture; pasture with anthropized areas | 352378 | 4951776 | 68 |
| 18 | Crissolo, track to Pian (plan) Giasset | 1536-1850 | Larch forest | 353087 | 4951391 | 224 |
| 19 | Crissolo, track to Pian (plan) Giasset, Meire (huts) Balmasse | 1650 | Pasture | 353420 | 4950929 | 9 |
| 20 | Crissolo, intermediate skilift departure to Pian (plan) Giasset | 1845 | Pasture | 353087 | 4951391 | 3 |

**5.** List of collecting sites, with reference number, date of collection, placename with short description, altitude, main habitats, cartographic coordinates (expressed using UTM projection, ED50 geodetic system, zone 32T), number of *exsiccata* collected for each site. For detailed topographic map see figure 1.

| ***Herbarium* code** | **Institution, place** | **N. exs.** |
| --- | --- | --- |
| APP | Apennines Floristic Reasearch Center, Barisciano (L’Aquila) | 319 |
| BI | Herbarium Horti Botanici Barensis, Museum Botanical Garden, University of Bari | 83 |
| GE | Botanical Institute Hanbury and Botanical Garden, University of Genova | 61 |
| HFLA | Herbarium Flaminio, Sapienza University of Rome | 242 |
| HLUC | Herbarium Lucanum, Basilicata University, Potenza | 263 |
| MRSN | Regional Museum of Natural Sciences, Turin, Italy | 281 |
| MSNM | Museum of Natural History, Milan | 156 |
| PORUN | Herbarium Porticense, University of Naples Federico II, Portici (Napoli) | 255 |
| TO-HP | Herbarium Pedemontanum, University of Turin | 506 |
| **Private collection code** | **Botanist, place** |  |
| Herb. Bovio | Maurizio Bovio, Aosta | 16 |
| Herb. Cancellieri | Laura Cancellieri, at URT, Roma Tre University | 223 |
| Herb. Faraoni | Francesco Faraoni, at URT, Roma Tre University | 169 |
| Herb. Gangale & Uzunov | Carmen Gangale & Dimitar Uzunov, San Fili (CS) | 390 |
| Herb. Lattanzi | Edda Lattanzi, Roma | 38 |
| Herb. Rizzieri Masin | Roberto Rizzieri Masin, Padova | 107 |
| Herb. Salerno | Giovanni Salerno, Roma | 253 |
| Herb. Soldano | Adriano Soldano, Vercelli | 46 |
| Herb. Tilia | Agnese Tilia, Roma | 129 |

**6.** Public *herbaria* and private collections in which the *exsiccata* collected are kept. Acronyms of public collections refer to Thiers (2017); in the column on the right number of *exsiccata* kept in each collection.

**7.** Floristic list of taxa observed at the head of the Po Valley (Piedmont, province of Cuneo) with reference number of collecting site (see Suppl. material 1: 5) and *herbaria* collections (in brackets; code in Suppl. material 1: 6). Synonyms are reported in square brackets only in the case of changes occurred since Conti et al. (2005, 2007). Letter “E” indicates endemic taxon for Italy; letter “e” refers to exclusive taxon; letter “A” indicates alien unit, followed by “NAT” if naturalized and INV if invasive at a regional level. Symbol “**” indicates unit new for the regional flora and “*” indicates confirmed unit.

Lycophytes

Lycopodiaceae

***Huperzia selago*** (L.) Bernh. ex Schrank & Mart. subsp. ***selago***

3 (Herb. Gangale & Uzunov), 5 (GE, Herb. Salerno), 8 (Herb. Rizzieri Masin)

***Lycopodium clavatum*** L.

4 (TO-HP), 5 (APP)

Selaginellaceae

***Selaginella helvetica*** (L.) Spring

2 (APP, TO-HP, Herb. Rizzieri Masin), 3 (TO-HP, Herb. Cancellieri, Herb. Gangale & Uzunov, Herb. Salerno, Herb. Tilia), 4 (MSNM, PORUN, Herb. Cancellieri), 4.1 (Herb. Salerno), 5 (APP), 8 (Herb. Rizzieri Masin), 18 (Herb. Cancellieri 2 exs.)

***Selaginella selaginoides*** (L.) P.Beauv. ex Schrank & Mart.

3 (Herb. Tilia), 4 (PORUN, Herb. Cancellieri), 4.1 (Herb. Salerno), 5 (APP), 6 (TO-HP), 18 (PORUN, Herb. Cancellieri)

Ferns and fern allies

Equisetaceae

***Equisetum arvense*** L.

5 (PORUN), 17 (TO-HP)

Ophioglossaceae

***Botrychium lunaria*** (L.) Sw.

4 (PORUN), 5 (Herb. Salerno), 6 (MSNM, TO-HP, Herb. Faraoni, Herb. Gangale & Uzunov)

Dennstaedtiaceae

***Pteridium aquilinum*** (L.) Kuhn subsp. ***aquilinum***

16 (TO-HP)

Pteridaceae

***Cryptogramma crispa*** (L.) R.Br. ex Hook.

3 (TO-HP Herb. Gangale & Uzunov, Herb. Salerno, Herb. Tilia), 4 (BI, HLUC, MRSN, PORUN), 5 (APP, TO-HP), 6 (Herb. Cancellieri), 7 (TO-HP), 8 (Herb. Cancellieri, Herb. Faraoni, Herb. Rizzieri Masin)

Cystopteridaceae

***Cystopteris dickieana*** R.Sim

6 (GE)

***Cystopteris fragili***s (L.) Bernh.

2 (HLUC), 3 (TO-HP), 14.1 (HLUC), 18 (PORUN, Herb. Gangale & Uzunov)

***Gymnocarpium dryopteris*** (L.) Newman

3 (HFLA, TO-HP, Herb. Gangale & Uzunov), 4 (PORUN), 5 (MRSN), 7 (TO-HP)

***Gymnocarpium robertianum*** (Hoffm.) Newman

18 (PORUN, Herb. Gangale & Uzunov 2 exs.)

Aspleniaceae

***Asplenium adiantum-nigrum*** L. subsp. ***adiantum-nigrum***

2 (HFLA, Herb. Rizzieri Masin)

***Asplenium cuneifolium*** Viv. subsp. ***cuneifolium***

4 (PORUN, Herb. Rizzieri Masin), 6 (GE, TO-HP)

***Asplenium ruta-muraria*** L. subsp. ***ruta-muraria***

4.1 (Herb. Gangale & Uzunov, Herb. Soldano)

***Asplenium septentrionale*** (L.) Hoffm. subsp. ***septentrionale***

2 (APP, MRSN, PORUN, TO-HP, Herb. Cancellieri), 3 (HLUC, Herb. Salerno), 4 (PORUN), 4.1 (Herb. Salerno), 5 (MRSN), 6 (GE), 8 (PORUN)

***Asplenium trichomanes*** L. subsp. ***trichomanes***

1 (MRSN, Herb. Tilia), 2 (HLUC, Herb. Gangale & Uzunov), 6 (GE)

***Asplenium viride*** Huds.

4 (MSNM, PORUN, Herb. Lattanzi), 5 (MRSN, Herb. Cancellieri), 6 (HLUC)

Thelypteridaceae

***Oreopteris limbosperma*** (All.) Holub

2 (TO-HP)

***Phegopteris connectilis*** (Michx.) Watt

3 (GE, MRSN, Herb. Salerno), 7 (Herb. Salerno), 18 (TO-HP)

Athyriaceae

***Athyrium distentifolium*** Tausch ex Opiz

1 (HFLA, TO-HP), 3 (Herb. Rizzieri Masin), 4 (Herb. Rizzieri Masin), 8 (TO-HP), 14 (TO-HP)

***Athyrium filix-femina*** (L.) Roth

1 (APP 2 exs., HLUC), 3 (TO-HP), 4 (PORUN), 17 (TO-HP)

Dryopteridaceae

***Dryopteris cambrensis*** (Fraser-Jenk.) J.Beitel & W.R.Buck subsp. ***insubrica*** (Oberh. & Tavel ex Fraser-Jenk.) Fraser-Jenk.

[*Dryopteris affinis* (Lowe) Fraser-Jenk. subsp. *cambrensis* Fraser-Jenk.]

1 (HFLA), 2 (HFLA, TO-HP, Herb. Rizzieri Masin), 3 (MSNM, TO-HP), 4 (HLUC), 5 (Herb. Gangale & Uzunov), 8 (Herb. Cancellieri, Herb. Soldano), 9 (TO-HP, Herb. Rizzieri Masin), 13 (HLUC), 13.1 (TO-HP), 15 (TO-HP, Herb. Gangale & Uzunov), 16 (TO-HP)

The specimens collected in the sites 13 and 15 are doubtfully referable to this taxon.

***Dryopteris carthusiana*** (Vill.) H.P.Fuchs

1 (MSNM), 4 (Herb. Rizzieri Masin)

***Dryopteris dilatata*** (Hoffm.) A.Gray

3 (MRSN, MSNM), 8 (Herb. Rizzieri Masin), 9 (APP)

***Dryopteris filix-mas*** (L.) Schott

1 (HFLA)

***Polystichum lonchitis*** (L.) Roth

3 (PORUN, TO-HP), 4 (HLUC, MRSN, PORUN, Herb. Rizzieri Masin)

Polypodiaceae

***Polypodium vulgare*** L.

1 (HLUC, MSNM, PORUN, TO-HP, Herb. Gangale & Uzunov, Herb. Rizzieri Masin, Herb. Salerno), 2 (HFLA, HLUC, TO-HP), 3 (BI, MRSN), 14 (Herb. Rizzieri Masin)

Gymnosperms

Pinaceae

***Abies alba*** Mill.

18 (PORUN)

***Larix decidua*** Mill.

8 (BI, MRSN, PORUN, TO-HP)

Cupressaceae

***Juniperus communis*** L.

5 (Herb. Salerno), 8 (HLUC, MRSN, TO-HP), 18 (TO-HP)

Angiosperms

Tofieldiaceae

***Tofieldia calyculata*** (L.) Wahlenb.

3 (TO-HP), 3.1 (HFLA), 4 (PORUN), 4.1 (Herb. Salerno), 6 (APP), 17 (HLUC), 18 (PORUN, Herb. Cancellieri, Herb. Gangale & Uzunov, Herb. Faraoni, Herb. Salerno)

Colchicaceae

***Colchicum autumnale*** L.

3 (TO-HP), 4.1 (TO-HP)

Melanthiaceae

***Paris quadrifolia*** L.

1 (Herb. Gangale & Uzunov, Herb. Rizzieri Masin), 18 (Herb. Salerno)

***Veratrum album*** L.

[incl. *V. lobelianum* Bernh.]

1 (APP, HFLA, Herb. Faraoni), 6.1 (Herb. Gangale & Uzunov), 9 (HLUC), 12 (PORUN, Herb. Cancellieri), 13.1 (MSNM, Herb. Tilia)

The specimens are identified both as *V. album* and *V. lobelianum* Bernh. In Bartolucci et al. (2018) *V. lobelianum* is included in *V. album*.

Liliaceae

***Lilium bulbiferum*** L. subsp. ***croceum*** (Chaix) Jan

3.1 (HFLA), 15 (TO-HP)

Orchidaceae

***Anacamptis pyramidalis*** (L.) Rich.

3.1 (APP)

***Coeloglossum viride*** (L.) Hartm.

1 (Herb. Rizzieri Masin), 4 (no *exsiccatum* photo by Stinca), 4.1 (Herb. Soldano), 5 (no *exsiccatum* photo by Romano)

***Dactylorhiza maculata*** (L.) Soó subsp. ***fuchsii*** (Druce) Hyl.

1 (APP, HLUC, HFLA), 4 (HLUC, PORUN), 9 (APP, HLUC, PORUN), 13 (HLUC, Herb. Gangale & Uzunov), 17 (HLUC)

***Epipactis atrorubens*** (Hoffm.) Besser

3.1 (APP)

***Gymnadenia conopsea*** (L.) R.Br.

4 (HLUC, PORUN), 5 (HLUC)

***Gymnadenia odoratissima*** (L.) Rich.

18 (PORUN)

***Herminium monorchis*** (L.) R.Br.

3 (PORUN, TO-HP, Herb. Cancellieri), 4.1 (Herb. Soldano), 5 (APP)

***Neotinea ustulata*** (L.) R.M.Bateman, Pridgeon & M.W.Chase

[*Orchis ustulata* L.]

3.1 (APP), 4 (Herb. Rizzieri Masin), 5 (HLUC)

***Neottia ovata*** (L.) Bluff & Fingerh.

[*Listera ovata* (L.) R.Br.]

17 (HLUC)

***Nigritella corneliana*** (Beauverd) Gölz & H.R.Reinhard

5 (HLUC), 6 (APP)

***Nigritella rhellicani*** Teppner & E.Klein

3 (HFLA, PORUN), 5 (APP, HLUC)

***Platanthera bifolia*** (L.) Rich.

4 (no *exsiccatum* photo by Romano)

***Platanthera chlorantha*** (Custer) Rchb.

3 (PORUN)

Asphodelaceae

***Asphodelus macrocarpus*** Parl. subsp. ***macrocarpus***

13.1 (APP, MSNM)

The two specimens are not ripe enough to clearly show the capsule characters considered in Díaz Lifante and Valdès (1996) distinctive between *A. macrocarpus* and *A. albus* Mill. subsp. *delphinensis* (Gren. & Godr.) Z.Díaz & Valdés; moreover, these characters seem to be not significant or overlapping in north-west Italian populations. Currently only the presence of *A. macrocarpus* Parl. subsp. *macrocarpus*is assessed; the presence of *A. albus* subsp. *delphinensis*, in Díaz Lifante and Valdés (1996), is given generically in the Western Alps and is to be further investigated.

Asparagaceae

***Maianthemum bifolium*** (L.) F.W. Schmidt

1 (Herb. Salerno), 3 (HLUC, MRSN, PORUN, TO-HP, Herb. Salerno), 4 (Herb. Lattanzi), 18 (Herb. Faraoni, Herb. Gangale & Uzunov)

***Ornithogalum kochii*** Parl. subsp. ***monticola*** (Jord. & Fourr.) Peruzzi

[*Ornithogalum monticolum* Jord. & Fourr.]

6 (APP, MSNM), 9 (HLUC), 17 (BI), 18 (APP, HFLA, PORUN, Herb. Lattanzi)

***Paradisea liliastrum*** (L.) Bertol.

3.1 (HFLA), 4 (BI, PORUN), 6 (APP, MRSN, Herb. Faraoni, Herb. Gangale & Uzunov)

***Polygonatum multiflorum*** (L.) All.

16 (Herb. Salerno)

***Polygonatum odoratum*** (Mill.) Druce

4.1 (Herb. Soldano)

***Polygonatum verticillatum*** (L.) All.

3.1 (HFLA), 4 (PORUN), 4.1 (Herb. Salerno, Herb. Soldano), 5 (no *exsiccatum* photo by Rosati), 6 (Herb. Cancellieri)

Juncaceae

***Juncus alpinoarticulatus*** Chaix subsp. ***alpinoarticulatus***

3.1 (MSNM), 4 (PORUN)

***Juncus articulatus*** L. subsp. ***articulatus***

5 (Herb. Cancellieri), 8 (MRSN), 9 (Herb. Cancellieri, Herb. Gangale & Uzunov, Herb. Salerno)

***Juncus bufonius*** L.

9 (MRSN, MSNM, Herb. Gangale & Uzunov, Herb. Salerno, Herb. Tilia)

***Juncus conglomeratus*** L.

8 (Herb. Salerno), 9 (PORUN)

***Juncus effusus*** L. subsp. ***effusus***

8 (MRSN), 9 (HLUC, MRSN), 13 (HFLA)

***Juncus filiformis*** L.

4 (TO-HP)

***Juncus jacquinii*** L.

7 (MRSN, TO-HP)

A INV ***Juncus tenuis*** Willd.

9 (APP, HFLA, HLUC, MRSN, MSNM, Herb. Gangale & Uzunov, Herb. Salerno, Herb. Tilia)

***Juncus triglumis*** L. subsp. ***triglumis***

4 (TO-HP), 7 (Herb. Cancellieri)

***Luzula alpinopilosa*** (Chaix) Breistr. subsp. ***alpinopilosa***

4.1 (TO-HP), 5 (MRSN), 6.1 (Herb. Gangale & Uzunov)

***Luzula lutea*** (All.) DC. subsp. ***lutea***

6 (Herb. Cancellieri)

***Luzula luzulina*** (Vill.) Racib.

18 (Herb. Gangale & Uzunov)

***Luzula luzuloides*** (Lam.) Dandy & Wilmott subsp. ***luzuloides***

1 (Herb. Gangale & Uzunov), 9 (Herb. Rizzieri Masin)

***Luzula multiflora*** (Ehrh.) Lej. subsp. ***multiflora***

3 (HFLA), 3.1 (HFLA), 5 (TO-HP), 5 (Herb. Gangale & Uzunov 2 exs.), 8 (MRSN, TO-HP), 8.1 (Herb. Gangale & Uzunov), 9 (HLUC), 15 (HFLA, Herb. Gangale & Uzunov), 18 (Herb. Cancellieri)

After the revision of these *Luzula* specimens, in 2017 the revision of a specimen collected in the Po Valley (Crissolo municipality) made by the specialist of the genus *Luzula* Bačič led to assess for the first time the presence of *L. expectata* Bačič & Jogan in Piedmont (Pascale et al. 2017). Given its close morphological similarity with *L. multiflora*, *L. sudetica* (Willd.) Schult*.* and *L. alpina* Hoppe (Bačič et al. 2007, Pignatti 2017), an in-depth or a specialist revision of the specimens collected is recommended (A. Selvaggi, pers. comm.).

***Luzula nivea*** (Nathh.) DC.

1 (APP, HFLA, TO-HP), 2 (TO-HP), 3 (HFLA, TO-HP, Herb. Gangale & Uzunov), 4 (PORUN, Herb. Faraoni, Herb. Rizzieri Masin), 8 (MRSN, Herb. Cancellieri), 9 (HLUC), 12 (Herb. Cancellieri), 13.1 (HFLA, Herb. Gangale & Uzunov), 15 (BI, MSNM, TO-HP, Herb. Cancellieri, Herb. Faraoni), 16 (GE, HFLA, MRSN, TO-HP), 18 (TO-HP)

***Luzula pedemontana*** Boiss. & Reut.

16 (GE, HFLA, MRSN, Herb. Bovio)

***Luzula sudetica*** (Willd.) Schult.

1 (Herb. Tilia), 3 (Herb. Faraoni), 4 (Herb. Faraoni)

***Oreojuncus trifidus*** (Jacq.) Záv. Drábk. & Kirschner

[*Juncus trifidus* L. subsp. *trifidus*]

3 (Herb. Rizzieri Masin), 3.1 (MSNM), 4 (PORUN), 4.1 (Herb. Salerno), 5 (HLUC), 5 (Herb. Gangale & Uzunov), 6 (MRSN, Herb. Cancellieri, Herb. Gangale & Uzunov), 7 (Herb. Salerno)

Cyperaceae

***Blysmus compressus*** (L.) Panz. ex Link

5 (MRSN, PORUN, TO-HP)

***Carex australpina*** Bech.

[*Carex ferruginea* Scop. subsp. *australpina* (Bech.) W. Dietr.]

3.1 (MRSN, MSNM, TO-HP), 18 (Herb. Gangale & Uzunov)

Taxon identification and nomenclature follow Molina et al. (2011).

***Carex capillaris*** L. subsp. ***capillaris***

5 (MRSN, TO-HP, Herb. Cancellieri)

***Carex caryophyllea*** Latourr.

4.1 (MRSN, TO-HP), 5 (MRSN, Herb. Cancellieri), 8 (APP, PORUN)

***Carex davalliana*** Sm.

4.1 (MRSN, TO-HP), 5 (PORUN)

***Carex demissa*** Hornem.

5 (TO-HP)

***Carex digitata*** L.

4 (TO-HP), 18 (Herb. Gangale & Uzunov)

***Carex echinata*** Murray

4.1 (MRSN, TO-HP), 5 (PORUN), 7 (TO-HP), 8 (APP 2 exs.), 8.1 (Herb. Gangale & Uzunov), 9 (HFLA, HLUC, MRSN, PORUN, Herb. Cancellieri, Herb. Faraoni, Herb. Rizzieri Masin, Herb. Salerno, Herb. Tilia)

***Carex fimbriata*** Schkuhr

3 (TO-HP), 3.1 (MSNM, TO-HP), 4.1 (MRSN, Herb. Tilia)

***Carex flacca*** Schreb. subsp. ***flacca***

3.1 (TO-HP), 4 (PORUN), 4.1 (Herb. Tilia), 5 (APP, MRSN, Herb. Cancellieri, Herb. Gangale & Uzunov 3 exs.), 18 (TO-HP, Herb. Gangale & Uzunov)

***Carex flava*** L.

1 (Herb. Cancellieri 2 exs., Herb. Gangale & Uzunov), 3 (TO-HP), 3.1 (TO-HP), 8 (APP, MRSN), 8.1 (Herb. Gangale & Uzunov), 9 (HLUC), 13 (TO-HP, Herb. Cancellieri, Herb. Gangale & Uzunov), 13.1 (Herb. Tilia)

***Carex frigida*** All.

3 (HFLA), 4.1 (TO-HP, Herb. Tilia), 5 (Herb. Gangale & Uzunov)

***Carex humilis*** Leyss.

3.1 (MRSN, TO-HP)

***Carex lepidocarpa*** Tausch subsp. ***lepidocarpa***

3.1 (MRSN, TO-HP), 5 (Herb. Cancellieri)

***Carex lepidocarpa*** Tausch × ***Carex demissa*** Hornem.

4.1 (Herb. Tilia)

***Carex leporina*** L.

[*Carex ovalis* Gooden.]

4 (MRSN, TO-HP), 8 (MRSN, Herb. Salerno, Herb. Tilia), 8.1 (Herb. Gangale & Uzunov), 9 (HFLA, HLUC, MRSN, Herb. Cancellieri, Herb. Faraoni, Herb. Salerno), 13 (Herb. Gangale & Uzunov)

***Carex mucronata*** All.

3.1 (HFLA, MRSN, TO-HP 2 exs.), 4 (Herb. Cancellieri), 4.1 (Herb. Gangale & Uzunov, Herb. Tilia), 5 (Herb. Bovio), 6 (APP)

***Carex muricata*** L.

3.1 (MRSN, TO-HP), 4.1 (Herb. Gangale & Uzunov)

***Carex nigra*** (L.) Reichard subsp. ***nigra***

5 (Herb. Gangale & Uzunov), 7 (MRSN, TO-HP), 8.1 (TO-HP, Herb. Gangale & Uzunov 3 exs.), 9 (HFLA, Herb. Rizzieri Masin), 13 (Herb. Cancellieri, Herb. Gangale & Uzunov, Herb. Rizzieri Masin), 13.1 (Herb. Tilia)

This is the only subspecies assessed in Italy, for the moment it’s not possible to distinguish other subspecies on the Alps.

***Carex ornithopoda*** Willd.

3 (Herb. Gangale & Uzunov), 4 (TO-HP), 4.1 (TO-HP, Herb. Tilia), 5 (Herb. Gangale & Uzunov), 18 (TO-HP, Herb. Cancellieri 2 exs.)

***Carex pallescens*** L.

1 (TO-HP, Herb. Cancellieri, Herb. Gangale & Uzunov, Herb. Salerno, Herb. Tilia), 3 (MRSN, TO-HP, Herb. Cancellieri, Herb. Gangale & Uzunov, Herb. Salerno, Herb. Tilia), 4 (Herb. Cancellieri, Herb. Faraoni), 4.1 (Herb. Salerno, Herb. Tilia), 8 (APP), 8.1 (Herb. Gangale & Uzunov), 9 (HLUC, Herb. Cancellieri, Herb. Faraoni, Herb. Salerno, Herb. Tilia), 13 (HFLA, Herb. Cancellieri), 18 (Herb. Cancellieri)

***Carex panicea*** L.

4 (PORUN, Herb. Faraoni), 4.1 (Herb. Tilia), 5 (MRSN, TO-HP, Herb. Cancellieri, Herb. Gangale & Uzunov 2 exs.), 8.1 (Herb. Gangale & Uzunov)

***Carex paniculata*** L. subsp. ***paniculata***

1 (Herb. Gangale & Uzunov), 4 (BI, PORUN), 4.1 (MRSN, TO-HP)

***Carex pilulifera*** L. subsp. ***pilulifera***

8 (TO-HP, Herb. Gangale & Uzunov, Herb. Tilia)

***Carex sempervirens*** Vill. subsp. ***sempervirens***

3 (HFLA, Herb. Cancellieri), 3.1 (HFLA), 4 (PORUN 2 exs., Herb. Cancellieri), 4.1 (MRSN, TO-HP, Herb. Gangale & Uzunov, Herb. Tilia), 5 (MRSN, TO-HP, Herb. Cancellieri), 6 (APP), 7 (MRSN), 8 (Herb. Cancellieri)

***Carex sylvatica*** Huds.

1 (Herb. Cancellieri, Herb. Faraoni, Herb. Gangale & Uzunov, Herb. Salerno 2 exs.)

***Carex viridula*** Michx.

9 (PORUN, Herb. Rizzieri Masin)

***Eleocharis quinqueflora*** (Hartmann) O.Schwarz

4.1 (TO-HP)

***Eriophorum angustifolium*** Honck. subsp. ***angustifolium***

8 (APP), 8.1 (TO-HP, Herb. Gangale & Uzunov)

***Isolepis setacea*** (L.) R.Br.

9 (APP, BI 2 exs., GE, HFLA, HLUC, TO-HP 2 exs., Herb. Gangale & Uzunov, Herb. Rizzieri Masin, Herb. Salerno, Herb. Tilia)

Poaceae

***Agrostis alpina*** Scop.

3 (TO-HP, HFLA, MSNM, Herb. Gangale & Uzunov)

***Agrostis capillaris*** L. subsp. ***capillaris***

1 (Herb. Gangale & Uzunov), 2 (TO-HP), 3 (HFLA), 15 (Herb. Gangale & Uzunov), 18 (Herb. Cancellieri)

***Agrostis rupestris*** All. subsp. ***rupestris***

3 (TO-HP), 3.1 (APP)

***Agrostis stolonifera*** L. subsp. ***stolonifera***

2 (TO-HP), 12 (Herb. Gangale & Uzunov)

***Anisantha sterilis*** (L.) Nevski

[*Bromus sterilis* L.]

18 (TO-HP)

***Anthoxanthum*** ***odoratum*** L. subsp. ***nipponicum*** (Honda) Tzvelev

7 (MSNM)

***Anthoxanthum*** ***odoratum*** L. subsp. ***odoratum***

4 (BI), 8 (HLUC), 9 (HLUC)

***Avenella*** ***flexuosa*** (L.) Drejer subsp. ***flexuosa***

[*Deschampsia flexuosa* (L.) Trin. subsp. *flexuosa*]

2 (PORUN, Herb. Cancellieri), 3 (BI, TO-HP, Herb. Cancellieri, Herb. Gangale & Uzunov, Herb. Salerno, Herb. Tilia), 4 (GE, MRSN, Herb. Faraoni), 4.1 (Herb. Salerno), 5 (HLUC), 6 (Herb. Gangale & Uzunov), 8 (APP, HLUC, Herb. Tilia), 13.1 (Herb. Gangale & Uzunov), 17 (HLUC), 18 (Herb. Cancellieri)

***Bellardiochloa*** ***variegata*** (Lam.) Kerguélen subsp. ***variegata***

6 (MSNM), 8 (Herb. Lattanzi), 9 (BI), 12 (MSNM)

***Brachypodium*** ***rupestre*** (Host) Roem. & Schult.

[*Brachypodium cespitosum* (Host) Roem. & Schult.]

1 (HLUC, MSNM 2 exs., TO-HP, Herb. Gangale & Uzunov), 2 (TO-HP), 5 (Herb. Gangale & Uzunov), 15 (TO-HP), 17 (Herb. Cancellieri)

***Briza*** ***media*** L.

1 (BI, Herb. Salerno, Herb. Tilia), 2 (TO-HP), 3 (BI, Herb. Faraoni, Herb. Salerno), 3.1 (HFLA), 4.1 (Herb. Salerno), 5 (HLUC, MRSN, TO-HP), 8 (TO-HP, Herb. Cancellieri), 13 (Herb. Gangale & Uzunov), 18 (Herb. Cancellieri)

***Bromopsis*** ***erecta*** (Huds.) Fourr. subsp. ***erecta***

[*Bromus erectus* Huds. subsp. *erectus*]

6 (HLUC), 17 (Herb. Gangale & Uzunov, Herb. Salerno)

The specimen collected in the site 17 is identified as *Bromus erectus* Huds. subsp. *longiflorus* (Willd. ex Spreng.) Arcang. This taxon is separated by Conti et al. (2005) from the subsp. *erectus*, morphologically distinguishable, reported for central Italy; Tison and De Foucault (2014) consider it a morphological outcome of richness of nitrogen in the soil (E. Banfi, pers. comm.); Bartolucci et al. (2018) don’t consider this taxa and synonymize it with *Bromopsis* *erecta* (Huds.) Fourr. subsp. *erecta.*

***Bromus*** ***arvensis*** L. subsp. ***arvensis***

3 (Herb. Salerno), 17 (Herb. Salerno), 18 (TO-HP)

***Calamagrostis*** ***arundinacea*** (L.) Roth

3 (HFLA, TO-HP), 8 (HFLA), 12 (HFLA)

***Calamagrostis*** ***varia*** (Schrad.) Host

3 (PORUN), 4.1 (MSNM)

***Cynosurus*** ***cristatus*** L.

1 (Herb. Faraoni), 3 (TO-HP), 4 (BI), 8 (Herb. Salerno), 9 (HLUC, MRSN, TO-HP, Herb. Faraoni, Herb. Gangale & Uzunov)

***Cynosurus*** ***echinatus*** L.

16 (HLUC, MSNM)

***Dactylis*** ***glomerata*** L. subsp. ***glomerata***

1 (MRSN), 2 (TO-HP), 4 (PORUN, Herb. Faraoni), 5 (Herb. Cancellieri), 12 (TO-HP, Herb. Gangale & Uzunov), 17 (PORUN)

***Danthonia*** ***decumbens*** (L.) DC. subsp. ***decumbens***

8 (TO-HP)

***Deschampsia*** ***cespitosa*** (L.) P.Beauv. subsp. ***cespitosa***

1 (Herb. Cancellieri)

***Drymochloa*** ***sylvatica*** (Pollich) Holub

[*Festuca altissima* All.]

12 (HFLA)

***Elymus*** ***caninus*** (L.) L.

2 (TO-HP), 17 (Herb. Cancellieri)

***Festuca*** ***arvernensis*** Auquier subsp. ***costei*** (St.-Yves) Auquier & Kerguélen

3 (HFLA, TO-HP, Herb. Cancellieri), 3.1 (HFLA), 4 (PORUN), 5 (Herb. Cancellieri), 6 (Herb. Cancellieri)

***Festuca*** ***filiformis*** Pourr.

8 (Herb. Cancellieri, Herb. Soldano), 9 (PORUN), 15 (HFLA), 16 (Herb. Bovio)

***Festuca*** ***flavescens*** Bellardi

2 (MSNM, Herb. Cancellieri), 3 (MSNM), 15 (HFLA, MSNM, PORUN, Herb. Cancellieri, Herb. Gangale & Uzunov), 18 (HFLA, PORUN, Herb. Cancellieri)

***Festuca*** ***heterophylla*** Lam.

1 (Herb. Salerno), 2 (MSNM)

***Festuca*** ***laevigata*** Gaudin

[incl. *Festuca laevigata* Gaudin subsp. *crassifolia* (Gaudin) Kerguélen & Plonka]

3 (Herb. Cancellieri), 3.1 (HFLA), 4 (HFLA), 5 (Herb. Soldano), 8 (HFLA 2 exs., Herb. Cancellieri), 14 (MSNM)

***Festuca*** ***nigricans*** (Hack.) K.Richt.

6 (Herb. Cancellieri)

***Festuca*** ***rubra*** L. subsp. ***commutata*** (Gaudin) Markg.-Dannenb.

1 (HFLA), 2 (TO-HP), 3 (HFLA), 4 (PORUN), 6 (TO-HP), 9 (TO-HP)

***Festuca*** ***rubra*** L. subsp. ***juncea*** (Hack.) K.Richt.

3 (Herb. Cancellieri), 4 (HFLA), 8 (HFLA), 18 (Herb. Cancellieri)

***Festuca*** ***trichophylla*** (Ducros ex Gaudin) K.Richt. subsp. ***trichophylla***

3 (Herb. Cancellieri)

***Festuca*** ***violacea*** Ser. ex Gaudin subsp. ***violacea***

4 (PORUN)

***Glyceria*** ***fluitans*** (L.) R.Br.

9 (Herb. Salerno)

***Glyceria*** ***notata*** Chevall.

8 (Herb. Salerno), 9 (MSNM, TO-HP, Herb. Cancellieri 2 exs., Herb. Tilia)

* ***Helictochloa*** ***praeusta*** (Rchb.) Romero Zarco subsp. ***pseudoviolacea*** (Dalla Torre) H.Scholz

[*Avenula praeusta* (Rchb.) Holub]

3 (TO-HP), 4.1 (Herb. Salerno)

This subspecies is considered “Doubtful” in Piedmont because literature data on *Helictochloa praeusta* (Rchb.) Romero Zarco cannot be attributed with certainty to the subsp. *pseudoviolacea* (A. Selvaggi and D. Bouvet, pers. comm.). Though it seems that the whole alpine populations is to be ascribed to this subspecies, while the nominal subspecies would be present only in the Dinaric Alps (E. Banfi, pers. comm.).

***Helictotrichon*** ***sedenense*** (Clarion ex DC.) Holub subsp. ***sedenense***

4 (HFLA)

***Holcus*** ***lanatus*** L. subsp. ***lanatus***

9 (Herb. Salerno)

***Holcus*** ***mollis*** L. subsp. ***mollis***

8 (Herb. Salerno), 13 (MSNM, PORUN)

***Koeleria*** ***hirsuta*** Gaudin

3 (HFLA), 3.1 (HFLA), 4.1 (Herb. Soldano), 5 (Herb. Cancellieri, Herb. Gangale & Uzunov), 6 (Herb. Gangale & Uzunov)

***Koeleria*** ***pyramidata*** (Lam.) P.Beauv.

3 (HFLA), 4 (PORUN), 4.1 (Herb. Salerno 2 exs.), 6 (MSNM)

***Koeleria*** ***vallesiana*** (Honck.) Gaudin subsp. ***vallesiana***

3 (TO-HP 2 exs.), 3.1 (HFLA), 4.1 (MSNM), 5 (Herb. Cancellieri)

***Lolium*** ***apenninum*** (De Not.) Ardenghi & Foggi

[*Festuca pratensis* Huds. subsp. *apennina* (De Not.) Hegi]

3 (MSNM), 18 (PORUN)

***Lolium*** ***perenne*** L.

14 (TO-HP)

***Lolium*** ***pratense*** (Huds.) Darbysh.

[*Festuca pratensis* Huds. subsp. *pratensis*]

2 (TO-HP)

***Melica*** ***nutans*** L.

2 (TO-HP)

** ***Melica*** ***transsilvanica*** Schur subsp. ***klokovii*** Tzvelev

2 (BI 2 exs., MSNM, PORUN, Herb. Salerno)

The former italian checklists (Conti et al. 2005, 2007) assessed only the presence in Italy of *M*. *transsilvanica* Schur subsp. *transsilvanica*. According to Hempel (2011), the nominal subspecies would be assessed in northern Italy, while the subsp. *klokovii* would be present in central and southern Italy. The latest subspecies was recently recorded also for Lombardy (Bartolucci et al. 2018). However, the taxonomic validity of these subspecies is to be further investigated (E. Banfi, pers. comm.).

***Melica*** ***uniflora*** Retz.

16 (Herb. Salerno)

***Molinia*** ***caerulea*** (L.) Moench

8.1 (TO-HP)

***Nardus*** ***stricta*** L.

3 (Herb. Salerno), 4 (PORUN), 7 (TO-HP)

***Patzkea*** ***paniculata*** (L.) G.H.Loos subsp. ***paniculata***

[*Festuca paniculata* (L.) Schinz & Thell. subsp. *paniculata*]

8 (HFLA, Herb. Gangale & Uzunov, Herb. Rizzieri Masin)

***Phalaris*** ***arundinacea*** L. subsp. ***arundinacea***

2 (PORUN, Herb. Salerno)

***Phleum*** ***alpinum*** L.

3 (TO-HP), 4 (Herb. Faraoni), 5 (TO-HP), 6 (MSNM), 18 (HFLA)

***Phleum*** ***nodosum*** L.

[*Phleum bertolonii* DC.]

16 (MSNM)

***Phleum*** ***pratense*** L. subsp. ***pratense***

18 (Herb. Cancellieri)

***Phleum*** ***rhaeticum*** (Humphries) Rauschert

4 (PORUN), 6 (Herb. Cancellieri, Herb. Gangale & Uzunov), 18 (Herb. Gangale & Uzunov)

***Poa*** ***alpina*** L. subsp. ***alpina***

3 (TO-HP), 3.1 (HFLA), 4 (Herb. Cancellieri), 5 (Herb. Cancellieri), 7 (Herb. Cancellieri), 18 (Herb. Cancellieri)

***Poa*** ***angustifolia*** L.

5 (Herb. Cancellieri)

***Poa*** ***compressa*** L.

18 (TO-HP)

***Poa*** ***nemoralis*** L. subsp. ***glaucantha*** (Gaudin) Banfi

2 (HFLA)

The existence of the subsp. *glaucantha* (wrongly considered synonym of *Poa glauca* Vahl in some literature - E. Banfi, pers. comm.) has been taken into consideration only recently and wasn’t reported in Conti et al. (2005, 2007).

***Poa*** ***nemoralis*** L. subsp. ***nemoralis***

1 (GE, MRSN, Herb. Cancellieri, Herb. Gangale & Uzunov, Herb. Salerno, Herb. Tilia), 2 (PORUN, TO-HP), 3 (Herb. Gangale & Uzunov), 4 (PORUN, Herb. Rizzieri Masin), 6 (TO-HP), 12 (Herb. Cancellieri), 13 (TO-HP), 13.1 (TO-HP, Herb. Gangale & Uzunov), 14 (Herb. Rizzieri Masin), 15 (HFLA, TO-HP, Herb. Cancellieri)

***Poa*** ***palustris*** L. subsp. ***palustris***

9 (Herb. Gangale & Uzunov)

***Poa*** ***trivialis*** L.

3 (TO-HP), 6 (MSNM), 9 (TO-HP), 15 (TO-HP), 18 (TO-HP)

***Sesleria*** ***caerulea*** (L.) Ard. subsp. ***caerulea***

3 (HFLA, TO-HP), 4.1 (Herb. Salerno), 5 (Herb. Salerno), 18 (HLUC, Herb. Gangale & Uzunov 2 exs., Herb. Salerno)

***Trisetaria*** ***flavescens*** (L.) Baumg. subsp. ***flavescens***

1 (Herb. Salerno), 3 (Herb. Cancellieri, Herb. Salerno), 8 (MSNM, TO-HP), 9 (BI), 12 (Herb. Cancellieri), 13 (PORUN, Herb. Gangale & Uzunov), 18 (Herb. Cancellieri 2 exs.)

Ranunculaceae

***Aconitum*** ***burnatii*** Gáyer subsp. ***burnatii***

4 (PORUN), 15 (APP, HFLA, TO-HP), 18 (TO-HP)

***Aconitum*** ***lycoctonum*** L. emend. Koelle

5 (Herb. Gangale & Uzunov), 17 (BI, HLUC), 18 (Herb. Gangale & Uzunov, PORUN)

***Actaea*** ***spicata*** L.

2 (TO-HP)

***Anemonastrum*** ***narcissiflorum*** (L.) Holub subsp. ***narcissiflorum***

[*Anemone narcissiflora* L. subsp. *narcissiflora*]

3 (Herb. Rizzieri Masin), 6 (HLUC, MRSN, MSNM, TO-HP, Herb. Faraoni), 7 (Herb. Salerno)

***Aquilegia*** ***alpina*** L.

4 (no *exsiccatum* photo by Stinca), 5 (no *exsiccatum* photo by Rosati), 6 (GE), 7 (APP)

***Aquilegia*** ***atrata*** W.D.J.Koch

1 (APP)

***Caltha*** ***palustris*** L.

1 (Herb. Gangale & Uzunov), 2 (TO-HP), 3.1 (HFLA), 4 (PORUN), 7 (TO-HP), 12 (Herb. Salerno)

***Clematis*** ***alpina*** (L.) Mill.

3 (TO-HP), 4 (Herb. Soldano), 18 (Herb. Salerno)

***Clematis*** ***vitalba*** L.

2 (TO-HP)

***Delphinium*** ***dubium*** (Rouy & Foucaud) Pawl.

4 (PORUN), 5 (Herb. Soldano), 6 (APP 3 exs., HLUC)

*D.* *dubium* and *D. elatum* L. subsp. *helveticum* Pawl. are not easily distinguishable and their distinctive characters are in contrast in different floras. We decided to follow the most up-to-date floras available for the alpine area (Aeschimann et al. 2004, Tison and De Foucault 2014).

***Hepatica*** ***nobilis*** Mill.

1 (MRSN, Herb. Gangale & Uzunov), 3 (MRSN, Herb. Salerno), 16 (TO-HP), 18 (Herb. Salerno)

e ***Pulsatilla*** ***alpina*** (L.) Delarbre subsp. ***cottianaea*** (Beauverd) D.M.Moser

4 (BI, PORUN), 4.1 (Herb. Tilia), 6 (APP 2 exs., HLUC, MSNM, Herb. Faraoni, Herb. Gangale & Uzunov), 7 (MRSN)

***Ranunculus*** ***aconitifolius*** L.

3 (HFLA, Herb. Cancellieri), 6 (APP 2 exs.), 6.1 (Herb. Gangale & Uzunov)

***Ranunculus*** ***acris*** L. subsp. ***acris***

1 (APP, HFLA 2 exs., Herb. Gangale & Uzunov), 5 (APP), 8.1 (Herb. Gangale & Uzunov), 9 (Herb. Faraoni), 13 (Herb. Gangale & Uzunov), 18 (TO-HP, Herb. Gangale & Uzunov)

***Ranunculus*** ***bulbosus*** L.

3.1 (HFLA), 5 (Herb. Gangale & Uzunov)

***Ranunculus*** ***platanifolius*** L.

3 (TO-HP), 5 (Herb. Cancellieri), 6 (APP), 18 (TO-HP, Herb. Cancellieri)

***Ranunculus*** ***tuberosus*** Lapeyr.

[*Ranunculus serpens* Schrank, *Ranunculus serpens* Schrank subsp*. nemorosus* (DC.) G.López]

3 (HFLA, TO-HP, Herb. Bovio, Herb. Cancellieri), 5 (Herb. Gangale & Uzunov 2 exs.)

***Ranunculus*** ***villarsii*** DC.

3 (TO-HP), 5 (TO-HP), 18 (Herb. Cancellieri, Herb. Faraoni)

***Thalictrum*** ***minus*** L. subsp. ***minus***

3 (BI, HFLA, MRSN, Herb. Cancellieri, Herb. Faraoni, Herb. Gangale & Uzunov), 4 (BI, PORUN, Herb. Rizzieri Masin 2 exs.), 4.1 (Herb. Gangale & Uzunov, Herb. Soldano), 7 (Herb. Salerno)

***Trollius*** ***europaeus*** L. subsp. ***europaeus***

1 (HFLA), 18 (HFLA)

Papaveraceae

A NAT ***Papaver*** ***argemone*** L. subsp. ***argemone***

14 (BI, GE, HLUC, TO-HP, Herb. Cancellieri, Herb. Faraoni, Herb. Gangale & Uzunov, Herb. Lattanzi, Herb. Tilia)

Crassulaceae

***Hylotelephium*** ***anacampseros*** (L.) H.Ohba

3 (HFLA, MRSN, MSNM, PORUN, Herb. Gangale & Uzunov, Herb. Rizzieri Masin, Herb. Tilia 2 exs.), 4 (HLUC, Herb. Rizzieri Masin)

***Hylotelephium*** ***maximum*** (L.) Holub subsp. ***maximum***

2 (HLUC, MRSN, PORUN)

***Petrosedum*** ***montanum*** (Songeon & E.P.Perrier) Grulich

[*Sedum montanum* E.P. Perrier & Songeon subsp. *montanum*]

2 (Herb. Rizzieri Masin), 4 (Herb. Soldano), 8 (MRSN)

***Rhodiola*** ***rosea*** L.

4 (BI, PORUN, Herb. Rizzieri Masin), 5 (Herb. Salerno), 6 (HLUC), 6.1 (Herb. Gangale & Uzunov), 7 (MRSN, Herb. Cancellieri, Herb. Faraoni)

***Sedum*** ***acre*** L.

1 (APP, PORUN), 4.1 (Herb. Gangale & Uzunov), 5 (MRSN, TO-HP), 8 (HLUC)

***Sedum*** ***album*** L. subsp. ***album***

1 (TO-HP), 2 (MRSN, Herb. Gangale & Uzunov), 17 (HLUC)

***Sedum*** ***alpestre*** Vill.

3 (HFLA), 5 (MRSN), 7 (APP), 8 (BI, Herb. Rizzieri Masin 2 exs.), 16 (HFLA)

E ***Sedum*** ***alsinifolium*** All.

6 (MSNM), 15 (APP, GE, MRSN, MSNM, Herb. Bovio, Herb. Gangale & Uzunov, Herb. Salerno, Herb. Soldano)

***Sedum*** ***annuum*** L.

1 (APP, Herb. Tilia), 2 (APP, TO-HP), 4 (MSNM), 4.1 (Herb. Tilia), 8 (TO-HP, Herb. Gangale & Uzunov, Herb. Salerno), 15 (no *exsiccatum* photo by Rosati)

***Sedum*** ***atratum*** L. subsp. ***atratum***

4 (PORUN)

***Sedum*** ***dasyphyllum*** L. subsp. ***dasyphyllum***

4.1 (Herb. Gangale & Uzunov), 15 (MRSN, Herb. Gangale & Uzunov)

***Sempervivum*** ***alpinum*** Griseb. & Schenk

5 (MRSN)

***Sempervivum*** ***arachnoideum*** L.

1 (HLUC), 2 (BI, PORUN), 5 (Herb. Gangale & Uzunov), 8 (BI, HLUC, MRSN, TO-HP)

***Sempervivum*** ***montanum*** L. subsp. ***burnatii*** Wettst. ex Hayek

3 (HFLA, MRSN), 4 (MRSN, PORUN), 5 (APP), 8 (Herb. Lattanzi)

***Umbilicus*** ***rupestris*** (Salisb.) Dandy

2 (MRSN, TO-HP, Herb. Gangale & Uzunov)

Saxifragaceae

***Micranthes*** ***engleri*** (Dalla Torre) Galasso, Banfi & Soldano

[*Saxifraga stellaris* L. subsp. *engleri* P. Fourn.]

4 (PORUN), 4.1 (Herb. Tilia), 6 (APP, HLUC), 7 (MRSN, TO-HP, Herb. Cancellieri), 8.1 (Herb. Gangale & Uzunov), 9 (APP, HLUC, PORUN, TO-HP, Herb. Cancellieri, Herb. Faraoni, Herb. Gangale & Uzunov, Herb. Salerno, Herb. Tilia)

***Saxifraga*** ***aizoides*** L.

4.1 (Herb. Salerno, Herb. Tilia), 6 (Herb. Faraoni), 7 (HLUC), 18 (PORUN)

***Saxifraga*** ***aspera*** L.

7 (Herb. Salerno), 8 (APP), 9 (GE, HLUC), 15 (APP, MSNM, Herb. Salerno), 16 (HFLA)

***Saxifraga*** ***caesia*** L.

3.1 (HFLA), 4 (Herb. Soldano)

** ***Saxifraga*** ***cuneifolia*** L. subsp. ***robusta*** D.A.Webb

2 (APP, MRSN)

***Saxifraga*** ***diapensioides*** Bellardi

4.1 (Herb. Gangale & Uzunov)

***Saxifraga*** ***exarata*** Vill. subsp. ***exarata***

3.1 (HFLA), 4 (BI, PORUN), 4.1 (Herb. Salerno, Herb. Tilia), 5 (GE, HLUC, MRSN 2 exs., Herb. Cancellieri, Herb. Salerno), 6 (APP, MSNM, TO-HP, Herb. Cancellieri, Herb. Faraoni)

***Saxifraga*** ***paniculata*** Mill.

5 (MRSN, Herb. Gangale & Uzunov), 6 (APP), 18 (TO-HP)

***Saxifraga*** ***rotundifolia*** L. subsp. ***rotundifolia***

1 (APP), 3 (BI, MRSN), 5 (HLUC)

Fabaceae

***Anthyllis*** ***vulneraria*** L. subsp. ***polyphylla*** (DC.) Nyman

18 (HFLA)

***Anthyllis*** ***vulneraria*** L. subsp. ***vulnerarioides*** (All.) Arcang.

3.1 (HFLA, TO-HP), 4 (PORUN 2 exs., Herb. Rizzieri Masin 2 exs.), 4.1 (MSNM 2 exs., Herb. Gangale & Uzunov), 5 (APP, MRSN, TO-HP, Herb. Gangale & Uzunov), 7 (HLUC)

All the morphological characters of these specimens lead to *A.* *vulneraria* L. subsp. *vulnerarioides*, except for the calix lenght, that is 9.5-12 mm long in all the specimens, instead of 8-9 mm (according to Pignatti 1982) or 7-10 mm (according to Cullen 1976).

***Astragalus*** ***glycyphyllos*** L.

16 (HLUC, PORUN), 18 (TO-HP)

***Astragalus*** ***monspessulanus*** L. subsp. ***monspessulanus***

5 (Herb. Gangale & Uzunov)

***Cytisus*** ***hirsutus*** L.

2 (HFLA), 8 (APP, GE, MRSN, MSNM, PORUN, TO-HP, Herb. Cancellieri, Herb. Faraoni, Herb. Gangale & Uzunov, Herb. Salerno), 14 (Herb. Lattanzi), 15 (Herb. Salerno), 16 (APP, HLUC, PORUN, Herb. Gangale & Uzunov)

This species is intended *sensu* Cristofolini and Troìa (2006), Tison and De Foucault (2014) and The Euro+Med PlantBase, that consider *C. hirsutus* synonym of *C. supinus*. Aeschimann et al. (2004) and Bartolucci et al. (2018) keep these two taxa separated (A. Soldano, pers. comm.).

***Cytisus*** ***nigricans*** L. subsp. ***nigricans***

2 (APP, HFLA)

***Cytisus*** ***scoparius*** (L.) Link subsp. ***scoparius***

8 (TO-HP), 16 (TO-HP)

***Ervilia*** ***hirsuta*** (L.) Opiz

[*Vicia hirsuta* (L.) Gray]

15 (BI 2 exs., MRSN, TO-HP)

***Genista*** ***germanica*** L.

2 (APP, HFLA), 3 (HFLA, HLUC, PORUN, Herb. Gangale & Uzunov, Herb. Salerno, Herb. Tilia), 4 (PORUN, Herb. Faraoni), 5 (Herb. Gangale & Uzunov), 8 (BI, GE, PORUN, Herb. Cancellieri, Herb. Faraoni, Herb. Salerno, Herb. Tilia), 13.1 (Herb. Gangale & Uzunov), 18 (Herb. Salerno)

***Genista*** ***tinctoria*** L.

2 (HFLA), 3 (MRSN, Herb. Salerno, Herb. Tilia), 4 (Herb. Lattanzi), 8 (BI, GE, HFLA, HLUC, MRSN, PORUN, Herb. Gangale & Uzunov), 16 (APP)

***Hippocrepis*** ***comosa*** L. subsp. ***comosa***

3 (GE, TO-HP, Herb. Cancellieri, Herb. Gangale & Uzunov, Herb. Salerno)

***Laburnum*** ***alpinum*** (Mill.) Bercht. & J.Presl

1 (MRSN), 2 (HLUC, TO-HP), 8 (APP, BI, HLUC, MRSN, PORUN, Herb. Salerno), 13.1 (HFLA, Herb. Gangale & Uzunov), 18 (TO-HP)

***Lathyrus*** ***linifolius*** (Reichard) Bässler

1 (Herb. Faraoni), 13.1 (Herb. Tilia), 15 (Herb. Cancellieri)

***Lathyrus*** ***pratensis*** L. subsp. ***pratensis***

4.1 (Herb. Salerno), 5 (HLUC, Herb. Gangale & Uzunov), 7 (Herb. Salerno), 12 (Herb. Faraoni), 13 (TO-HP)

***Lathyrus*** ***sylvestris*** L. subsp. ***sylvestris***

2 (HLUC, Herb. Gangale & Uzunov), 16 (APP)

***Lotus*** ***corniculatus*** L. subsp. ***alpinus*** (DC.) Rothm.

3 (TO-HP), 4 (BI), 6 (TO-HP), 7 (MRSN), 8 (PORUN)

***Lotus*** ***corniculatus*** L. subsp. ***corniculatus***

1 (TO-HP), 2 (HFLA), 8 (Herb. Gangale & Uzunov 2 exs.), 8.1 (Herb. Gangale & Uzunov), 15 (TO-HP)

***Medicago*** ***lupulina*** L.

5 (TO-HP)

***Onobrychis montana*** DC. subsp. ***montana***

4 (Herb. Lattanzi, Herb. Rizzieri Masin), 4.1 (MSNM, Herb. Salerno, Herb. Tilia), 5 (APP 2 exs., Herb. Gangale & Uzunov)

***Onobrychis*** ***viciifolia*** Scop.

5 (HLUC, MRSN, Herb. Cancellieri, Herb. Faraoni), 17 (Herb. Salerno)

***Ononis*** ***spinosa*** L. subsp. ***procurrens*** (Wallr.) Briq.

[*Ononis spinosa* L. subsp. *maritima* (Dumort.) P. Fourn.]

16 (APP, HLUC, MSNM, PORUN, TO-HP 2 exs.)

A INV ***Robinia*** ***pseudacacia*** L.

2 (TO-HP)

***Trifolium*** ***alpestre*** L.

5 (APP, Herb. Gangale & Uzunov), 6 (HLUC), 12 (Herb. Cancellieri, Herb. Faraoni, Herb. Salerno), 13 (HLUC, PORUN), 13.1 (Herb. Tilia)

***Trifolium*** ***alpinum*** L.

3 (TO-HP), 4 (PORUN), 4.1 (Herb. Salerno), 5 (APP), 6 (APP, HLUC, MRSN, TO-HP, Herb. Cancellieri, Herb. Faraoni, Herb. Gangale & Uzunov), 8 (HFLA, Herb. Cancellieri, Herb. Tilia)

***Trifolium*** ***arvense*** L. subsp. ***arvense***

15 (Herb. Salerno)

***Trifolium*** ***aureum*** Pollich subsp. ***aureum***

1 (APP, HFLA), 2 (BI, HLUC, 2 exs., Herb. Cancellieri, Herb. Faraoni, Herb. Gangale & Uzunov), 8 (HLUC, Herb. Tilia), 9 (Herb. Gangale & Uzunov), 12 (TO-HP), 14 (Herb. Lattanzi), 15 (Herb. Tilia)

***Trifolium*** ***badium*** Schreb.

4 (PORUN), 5 (HLUC, Herb. Gangale & Uzunov), 6 (TO-HP, Herb. Gangale & Uzunov), 8 (HFLA, MRSN, Herb. Cancellieri, Herb. Faraoni), 18 (TO-HP, Herb. Cancellieri, Herb. Faraoni)

***Trifolium*** ***campestre*** Schreb.

2 (MSNM), 8 (GE)

***Trifolium*** ***montanum*** L. subsp. ***montanum***

1 (MRSN, Herb. Faraoni), 18 (HFLA, Herb. Cancellieri)

***Trifolium*** ***montanum*** L. subsp. ***rupestre*** (Ten.) Nyman

3 (Herb. Salerno, Herb. Tilia), 5 (APP)

***Trifolium*** ***ochroleucon*** Huds.

4 (HLUC), 6 (APP)

***Trifolium*** ***pallescens*** Schreb.

8 (TO-HP), 17 (TO-HP)

***Trifolium*** ***pannonicum*** Jacq. subsp. ***pannonicum***

8 (APP), 12 (TO-HP, Herb. Cancellieri, Herb. Gangale & Uzunov), 13.1 (APP)

***Trifolium*** ***pratense*** L. subsp. ***nivale*** Ces.

3 (Herb. Gangale & Uzunov), 6 (MSNM, MRSN), 8 (MRSN), 12 (Herb. Gangale & Uzunov), 17 (TO-HP), 20 (MSNM)

***Trifolium*** ***pratense*** L. subsp. ***pratense***

3 (Herb. Faraoni), 4.1 (Herb. Salerno), 5 (Herb. Faraoni), 8 (Herb. Cancellieri)

***Trifolium*** ***repens*** L.

5 (MRSN), 12 (Herb. Gangale & Uzunov)

***Trifolium*** ***thalii*** Vill.

6 (MRSN)

***Trigonella*** ***alba*** (Medik.) Coulot & Rabaute

[*Melilotus albus* Medik.]

2 (Herb. Faraoni), 16 (TO-HP)

***Vicia*** ***angustifolia*** L.

[*Vicia sativa* L. subsp. *nigra* (L.) Ehrh.]

15 (Herb. Cancellieri)

***Vicia*** ***cracca*** L.

15 (TO-HP), 17 (Herb. Faraoni)

***Vicia*** ***sepium*** L.

1 (Herb. Gangale & Uzunov, Herb. Salerno), 2 (TO-HP), 4 (Herb. Rizzieri Masin), 18 (Herb. Faraoni)

Polygalaceae

***Polygala*** ***alpestris*** Rchb. subsp. ***alpestris***

3 (HFLA), 5 (APP, MRSN, TO-HP, Herb. Cancellieri), 6 (HLUC, TO-HP), 8 (TO-HP), 12 (PORUN), 17 (Herb. Gangale & Uzunov), 18 (Herb. Faraoni), 20 (MSNM)

***Polygala*** ***serpyllifolia*** Hosé

8 (APP), 8.1 (Herb. Gangale & Uzunov)

***Polygala*** ***vulgaris*** L. subsp. ***vulgaris***

5 (APP), 8 (MSNM)

Rosaceae

***Agrimonia*** ***eupatoria*** L. subsp. ***eupatoria***

[incl. *Agrimonia eupatoria* L. subsp. *grandis* (Andrz.ex Asch. & Graebn.) Bornm.]

16 (APP)

***Alchemilla*** ***alpigena*** Buser ex Hegi

3 (MRSN, MSNM, Herb. Faraoni), 9 (Herb. Soldano)

***Alchemilla*** ***colorata*** Buser

4.1 (Herb. Soldano)

***Alchemilla*** ***connivens*** Buser

1 (TO-HP)

***Alchemilla*** ***effusa*** Buser

1 (APP)

***Alchemilla*** ***exigua*** Buser ex Paulin

3 (PORUN), 4.1 (Herb. Soldano), 18 (TO-HP)

***Alchemilla*** ***fissa*** Günther & Schummel

3 (MRSN)

***Alchemilla*** ***flabellata*** Buser

3 (HFLA), 4.1 (Herb. Soldano), 18 (TO-HP)

***Alchemilla*** ***glabra*** Neygenf.

1 (APP, GE, HFLA), 3 (HFLA), 3.1 (HFLA 2 exs.), 4.1 (Herb. Soldano), 9 (GE), 13 (TO-HP), 18 (TO-HP)

***Alchemilla*** ***pallens*** Buser

6 (TO-HP), 18 (TO-HP)

***Alchemilla*** ***reniformis*** Buser

1 (Herb. Cancellieri), 3 (HFLA, MRSN, Herb. Faraoni)

***Alchemilla*** ***saxatilis*** Buser

2 (BI, GE, HLUC, MRSN, MSNM, PORUN, Herb. Gangale & Uzunov), 3 (HLUC, TO-HP, Herb. Faraoni, Herb. Tilia 2 exs.), 4 (Herb. Faraoni), 4.1 (Herb. Soldano), 8 (BI, PORUN, TO-HP, Herb. Gangale & Uzunov, Herb. Soldano), 9 (GE, HLUC), 18 (HFLA)

***Alchemilla*** ***strigosula*** Buser

1 (HFLA)

***Alchemilla*** ***subcrenata*** Buser

1 (MRSN, TO-HP, Herb. Tilia), 3 (MRSN, Herb. Salerno)

***Alchemilla*** ***subsericea*** Reut.

3 (Herb. Gangale & Uzunov), 7 (MRSN), 18 (TO-HP)

***Alchemilla*** ***tenerrima*** S.E.Fröhner

18 (HFLA)

***** Alchemilla*** ***transiens*** (Buser) Buser

3 (BI)

This specimen has been identified as *A. subtruncata* Buser by the genus specialist S.E. Fröhner having characteristically large and obovate leaves. Fröhner (2002) considers this taxon falling within the variability of *A. transiens* and Buser named it *A. transiens* f. *latifolia*. The issue of taxonomic aknowledgment of these entities and of the existence of local endemics taxa of the genus *Alchemilla* has not yet been solved, but if *A. subtruncata* had its own systematic autonomy, it would probably be a narrow endemism of the Western Alps (F. Festi, pers. comm.).

E ***Alchemilla*** ***vaccariana*** Buser

3 (HFLA), 8 (HFLA)

***Alchemilla*** ***vetteri*** Buser

3 (MRSN)

***Alchemilla*** ***xanthochlora*** Rothm.

1 (APP), 3 (MRSN, Herb. Tilia)

***Amelanchier*** ***ovalis*** Medik. subsp. ***ovalis***

2 (TO-HP, Herb. Salerno), 8 (BI, PORUN, TO-HP, Herb. Tilia)

***Aruncus*** ***dioicus*** (Walter) Fernald

1 (HFLA), 18 (TO-HP, Herb. Gangale & Uzunov)

***Dryas*** ***octopetala*** L. subsp. ***octopetala***

3 (TO-HP), 3.1 (HFLA), 4.1 (Herb. Gangale & Uzunov), 18 (HLUC, PORUN, Herb. Cancellieri, Herb. Salerno)

***Filipendula*** ***ulmaria*** (L.) Maxim.

1 (TO-HP)

***Fragaria*** ***vesca*** L. subsp. ***vesca***

1 (MRSN), 15 (TO-HP), 17 (TO-HP)

***Geum*** ***montanum*** L.

3 (Herb. Salerno), 4 (PORUN), 4.1 (Herb. Salerno), 6 (APP, HLUC), 7 (MRSN, Herb. Faraoni)

***Geum*** ***rivale*** L.

1 (HLUC, MRSN, Herb. Cancellieri, Herb. Gangale & Uzunov, Herb. Rizzieri Masin, Herb. Tilia), 4 (PORUN), 6 (TO-HP, Herb. Faraoni), 7 (Herb. Salerno), 18 (Herb. Cancellieri, Herb. Gangale & Uzunov)

***Geum*** ***urbanum*** L.

1 (HLUC, MRSN, TO-HP, Herb. Faraoni), 15 (TO-HP)

***Potentilla*** ***argentea*** L.

14 (MSNM, Herb. Cancellieri, Herb. Rizzieri Masin 2 exs., Herb. Tilia), 15 (APP, MRSN, TO-HP)

***Potentilla*** ***caulescens*** L. subsp. ***caulescens***

4.1 (Herb. Gangale & Uzunov, Herb. Soldano)

***Potentilla*** ***erecta*** (L.) Raeusch.

1 (MRSN, Herb. Cancellieri, Herb. Faraoni, Herb. Gangale & Uzunov, Herb. Tilia), 3 (TO-HP), 4 (PORUN), 8 (HLUC), 8.1 (Herb. Gangale & Uzunov), 9 (HLUC, Herb. Tilia), 12 (Herb. Salerno), 13 (HLUC, TO-HP, Herb. Cancellieri, Herb. Gangale & Uzunov), 18 (HFLA, Herb. Cancellieri)

***Potentilla*** ***grandiflora*** L.

3 (HFLA, MSNM, TO-HP), 4 (MRSN, Herb. Rizzieri Masin), 5 (APP, Herb. Gangale & Uzunov, Herb. Soldano), 6.1 (Herb. Gangale & Uzunov), 7 (Herb. Salerno), 16 (HFLA), 18 ((TO-HP, Herb. Cancellieri)

***Poterium*** ***sanguisorba*** L. subsp. ***sanguisorba***

[*Sanguisorba minor* Scop. subsp. *minor*]

5 (TO-HP)

***Prunus*** ***avium*** (L.) L.

16 (Herb. Salerno)

***Rosa*** ***caesia*** Sm.

18 (Herb. Lattanzi)

***Rosa*** ***canina*** L.

2 (Herb. Lattanzi), 8 (Herb. Lattanzi), 14 (Herb. Lattanzi)

***Rosa*** ***corymbifera*** Borkh.

8 (Herb. Lattanzi), 9 (Herb. Lattanzi)

***Rosa*** ***dumalis*** Bechst.

1 (Herb. Lattanzi), 8 (APP, Herb. Lattanzi), 9 (Herb. Lattanzi)

***Rosa*** ***mollis*** Sm.

[incl. in *Rosa villosa* L.]

4 (Herb. Soldano), 8 (MSNM), 9 (GE, HFLA, MSNM)

The specimens collected in the site 4 is doubtfully referable to this taxon.

***Rosa*** ***pendulina*** L.

3 (HFLA), 5 (HLUC), 6 (APP), 7 (HLUC), 17 (HLUC), 18 (Herb. Salerno)

***Rosa*** ***subcanina*** (Christ) Vuk.

1 (Herb. Lattanzi), 8 (HFLA, MSNM, Herb. Lattanzi)

***Rosa*** ***subcollina*** (Christ) Vuk.

8 (Herb. Lattanzi), 9 (GE), 18 (Herb. Lattanzi)

***Rosa*** ***villosa*** L.

2 (Herb. Lattanzi), 3 (Herb. Lattanzi), 9 (Herb. Lattanzi), 18 (Herb. Lattanzi)

***Rubus*** ***caesius*** L.

14 (Herb. Lattanzi)

***Rubus*** ***idaeus*** L. subsp. ***idaeus***

1 (HLUC, MRSN), 3 (MRSN, TO-HP), 8 (TO-HP), 18 (TO-HP)

***Rubus*** ***ulmifolius*** Schott

2 (APP)

***Sanguisorba*** ***officinalis*** L.

4.1 (Herb. Salerno)

***Sorbus*** ***aria*** (L.) Crantz subsp. ***aria***

5 (TO-HP), 8 (BI, TO-HP), 12 (PORUN), 13.1 (APP)

***Sorbus*** ***aucuparia*** L. subsp. ***aucuparia***

1 (MRSN), 2 (TO-HP), 3 (TO-HP), 8 (TO-HP), 9 (TO-HP), 16 (TO-HP)

Rhamnaceae

***Oreoherzogia*** ***alpina*** (L.) W.Vent

[*Rhamnus alpina* L. subsp. *alpina*]

18 (Herb. Cancellieri, Herb. Salerno)

Ulmaceae

***Ulmus*** ***glabra*** Huds.

1 (TO-HP), 15 (TO-HP)

Cannabaceae

***Humulus*** ***lupulus*** L.

2 (HLUC)

Urticaceae

***Parietaria*** ***officinalis*** L.

2 (PORUN, TO-HP, Herb. Salerno)

***Urtica*** ***dioica*** L. subsp. ***dioica***

3 (TO-HP), 9 (TO-HP)

Fagaceae

***Castanea*** ***sativa*** Mill.

2 (MRSN), 16 (TO-HP)

***Fagus*** ***sylvatica*** L. subsp. ***sylvatica***

1 (BI, MRSN, Herb. Gangale & Uzunov, Herb. Salerno)

***Quercus*** ***petraea*** (Matt.) Liebl. subsp. ***petraea***

1 (HLUC, PORUN, TO-HP, Herb. Salerno), 3.1 (HFLA)

Betulaceae

***Alnus*** ***alnobetula*** (Ehrh.) K.Koch

[*Alnus viridis* (Chaix) DC.]

3 (HFLA, MRSN, PORUN, Herb. Faraoni, Herb. Salerno), 4 (HLUC), 9 (TO-HP), 18 (HFLA, TO-HP, Herb. Gangale & Uzunov)

***Betula*** ***pendula*** Roth

4 (PORUN), 8 (TO-HP, Herb. Salerno), 9 (PORUN, TO-HP)

***Corylus*** ***avellana*** L.

1 (HLUC, MRSN), 2 (MRSN), 8 (TO-HP), 12 (TO-HP), 15 (Herb. Gangale & Uzunov), 16 (TO-HP, Herb. Salerno)

Celastraceae

***Euonymus*** ***europaeus*** L.

2 (HLUC, MRSN)

***Parnassia*** ***palustris*** L. subsp. ***palustris***

3 (Herb. Salerno), 4.1 (Herb. Salerno), 17 (PORUN), 18 (TO-HP)

Oxalidaceae

***Oxalis*** ***acetosella*** L.

1 (PORUN, Herb. Salerno, Herb. Tilia), 3 (PORUN, TO-HP, Herb. Salerno), 15 (PORUN), 16 (PORUN), 18 (PORUN)

***Oxalis*** ***corniculata*** L.

14.1 (PORUN)

A NAT ***Oxalis*** ***stricta*** L.

1 (TO-HP)

Violaceae

***Viola*** ***arvensis*** Murray subsp. ***arvensis***

4.1 (Herb. Salerno), 8 (Herb. Salerno)

***Viola*** ***biflora*** L.

1 (APP, BI, Herb. Salerno), 3.1 (HFLA), 4 (PORUN), 5 (MRSN, Herb. Salerno), 6 (APP, HLUC, MRSN, TO-HP, Herb. Cancellieri, Herb. Faraoni, Herb. Gangale & Uzunov)

***Viola*** ***calcarata*** L. *s.l.*

5 (MRSN), 6 (TO-HP)

***Viola*** ***canina*** L. subsp. ***canina***

4 (GE), 9 (APP, HFLA, HLUC), 18 (APP)

***Viola*** ***cavillieri*** W.Becker

5 (APP), 6 (MSNM, Herb. Faraoni), 7 (GE)

***Viola*** ***palustris*** L.

8 (APP), 12 (Herb. Salerno), 13 (Herb. Cancellieri)

***Viola*** ***reichenbachiana*** Jord. ex Boreau

3 (Herb. Gangale & Uzunov), 5 (MRSN)

***Viola*** ***tricolor*** L. subsp. ***saxatilis*** (F.W.Schmidt) Jan

3.1 (HFLA), 4.1 (Herb. Cancellieri), 5 (Herb. Faraoni), 8 (APP, GE, MRSN), 12 (PORUN, Herb. Gangale & Uzunov)

***Viola*** ***tricolor*** L. subsp. ***tricolor***

1 (APP), 5 (HLUC), 9 (HLUC)

A specimen has been collected in the site 16 (HLUC) too, but is not identifiable at the subspecies level (indicated as *V. tricolor* L. *s.l*.).

Salicaceae

***Populus*** ***canescens*** (Aiton) Sm.

1 (MRSN)

***Populus*** ***tremula*** L.

1 (Herb. Salerno), 2 (PORUN)

***Salix*** ***appendiculata*** Vill.

1 (Herb. Rizzieri Masin), 3 (HFLA), 4 (PORUN, TO-HP), 5 (MRSN, TO-HP), 16 (HLUC), 18 (TO-HP, Herb. Salerno)

***Salix*** ***caprea*** L.

12 (TO-HP), 17 (TO-HP)

***Salix*** ***foetida*** Schleich. ex DC.

18 (TO-HP)

***Salix*** ***hastata*** L.

3 (TO-HP), 4 (Herb. Soldano), 18 (Herb. Gangale & Uzunov)

***Salix*** ***herbacea*** L.

7 (MRSN, Herb. Salerno)

***Salix*** ***serpillifolia*** Scop.

3.1 (HFLA)

** ***Salix*** ***waldsteiniana*** Willd.

3 (TO-HP)

Linaceae

***Linum*** ***alpinum*** Jacq.

3 (TO-HP), 4 (BI, GE, Herb. Rizzieri Masin), 4.1 (Herb. Gangale & Uzunov), 6 (APP 2 exs., HLUC, MRSN, MSNM, Herb. Faraoni, Herb. Gangale & Uzunov)

***Linum*** ***catharticum*** L. subsp. ***catharticum***

4 (TO-HP), 4.1 (Herb. Tilia), 5 (Herb. Cancellieri, Herb. Gangale & Uzunov), 18 (Herb. Salerno)

The specimen collected in the site 18 is doubtfully referable to this taxon (indicated as *L. catharticum* L. *s.l*.).

***Linum*** ***suffruticosum*** L. subsp. ***appressum*** (Caball.) Rivas Mart.

3 (TO-HP), 3.1 (HFLA, Herb. Bovio), 4 (PORUN), 4.1 (MSNM, Herb. Gangale & Uzunov, Herb. Soldano, Herb. Tilia), 5 (GE, MRSN, Herb. Cancellieri, Herb. Faraoni), 13.1 (Herb. Rizzieri Masin)

***Linum*** ***tenuifolium*** L.

3.1 (APP), 4.1 (Herb. Salerno)

Hypericaceae

***Hypericum*** ***humifusum*** L.

14 (Herb. Lattanzi), 15 (APP, BI, GE, HFLA, HLUC, MRSN, MSNM, PORUN, TO-HP 2 exs., Herb. Cancellieri, Herb. Faraoni, Herb. Gangale & Uzunov, Herb. Salerno, Herb. Tilia)

***Hypericum*** ***montanum*** L.

3 (Herb. Gangale & Uzunov), 18 (HFLA)

***Hypericum*** ***perforatum*** L. subsp. ***perforatum***

1 (APP, MRSN, Herb. Tilia), 2 (HFLA), 8 (HLUC, TO-HP), 9 (BI), 13 (TO-HP, Herb. Gangale & Uzunov)

***Hypericum*** ***richeri*** Vill. subsp. ***richeri***

3 (BI, HFLA, HLUC, MRSN, PORUN, Herb. Cancellieri, Herb. Faraoni, Herb. Salerno, Herb. Tilia), 4 (MRSN), 4.1 (Herb. Salerno), 5 (APP, TO-HP), 7 (Herb. Salerno), 8 (Herb. Cancellieri)

Euphorbiaceae

***Euphorbia*** ***dulcis*** L.

1 (HLUC, Herb. Gangale & Uzunov), 3 (Herb. Rizzieri Masin, Herb. Salerno), 5 (APP, Herb. Gangale & Uzunov), 15 (MRSN), 18 (PORUN, TO-HP, Herb. Cancellieri, Herb. Faraoni, Herb. Gangale & Uzunov, Herb. Salerno)

Geraniaceae

***Geranium*** ***nodosum*** L.

1 (TO-HP, Herb. Faraoni, Herb. Gangale & Uzunov, Herb. Rizzieri Masin, Herb. Tilia), 2 (HFLA, TO-HP), 8 (HLUC), 16 (Herb. Gangale & Uzunov, Herb. Salerno)

***Geranium*** ***pyrenaicum*** Burm.f. subsp. ***pyrenaicum***

3.1 (HFLA), 4 (TO-HP), 13.1 (TO-HP)

***Geranium*** ***robertianum*** L.

1 (BI, HLUC, TO-HP, Herb. Faraoni, Herb. Salerno), 8 (HLUC), 15 (TO-HP)

***Geranium*** ***sylvaticum*** L.

1 (TO-HP, Herb. Gangale & Uzunov), 4 (BI), 5 (Herb. Gangale & Uzunov 2 exs.), 6 (APP 2 exs., Herb. Faraoni), 7 (TO-HP), 18 (HFLA, Herb. Cancellieri, Herb. Faraoni, Herb. Salerno)

Onagraceae

***Chamaenerion*** ***angustifolium*** (L.) Scop.

[*Epilobium angustifolium* L.]

17 (TO-HP)

***Epilobium*** ***alsinifolium*** Vill.

7 (MRSN, TO-HP)

***Epilobium*** ***collinum*** C.C.Gmel.

2 (APP, HLUC, TO-HP), 4.1 (MSNM), 5 (Herb. Cancellieri), 8 (HLUC, MSNM, Herb. Soldano), 9 (MSNM), 14 (Herb. Rizzieri Masin), 14.1 (HLUC)

***Epilobium*** ***lanceolatum*** Sebast. & Mauri

15 (Herb. Cancellieri)

***Epilobium*** ***montanum*** L.

1 (MRSN, TO-HP, Herb. Gangale & Uzunov), 3 (MSNM, Herb. Cancellieri, Herb. Faraoni, Herb. Salerno), 4 (HLUC), 9 (Herb. Rizzieri Masin), 13.1 (TO-HP), 15 (TO-HP, Herb. Gangale & Uzunov)

***Epilobium*** ***obscurum*** Schreb.

8 (PORUN), 9 (APP, Herb. Faraoni), 13 (Herb. Gangale & Uzunov)

***Epilobium*** ***palustre*** L.

9 (HLUC, Herb. Gangale & Uzunov), 13 (TO-HP, Herb. Gangale & Uzunov)

Sapindaceae

***Acer*** ***pseudoplatanus*** L.

1 (TO-HP, Herb. Salerno), 3 (TO-HP), 4 (HLUC), 9 (HLUC), 12 (TO-HP, PORUN), 13.1 (HFLA, HLUC, MSNM, TO-HP)

The specimens collected in the site 13.1 have a tomentosity on the underleaf not usually present in *Acer pseudoplatanus* L. They could be interpreted as hybrids between *A.* *pseudoplatanus* L. and *A. opalus* Mill., although this hybrid is not recognized in literature. However hairy varieties of *A. pseudoplatanus* have been described: *A. pseudoplatanus* L. var. *tomentosum* Tausch (Tausch 1829) and *A. pseudoplatanus* L. var. *villosum* (J.Presl & C.Presl) Parl. (Parlatore 1875).

Thymelaeaceae

***Daphne mezereum*** L.

4 (MRSN), 5 (MRSN)

Cistaceae

***Helianthemum nummularium*** (L.) Mill. subsp. ***grandiflorum*** (Scop.) Schinz & Thell.

3.1 (APP), 5 (HLUC)

***Helianthemum nummularium*** (L.) Mill. subsp. ***obscurum*** (Čelak.) Holub

4 (MRSN, Herb. Cancellieri, Herb. Faraoni), 5 (MRSN 2 exs., Herb. Gangale & Uzunov)

***Helianthemum oelandicum*** (L.) Dum.Cours. subsp. ***italicum*** (L.) Ces.

3.1 (HFLA), 5 (HLUC, TO-HP, Herb. Gangale & Uzunov), 18 (Herb. Gangale & Uzunov)

The revision of this group follows Tison and De Foucault (2014).

Malvaceae

***Malva*** ***moschata*** L.

8 (Herb. Gangale & Uzunov)

***Tilia*** ***cordata*** Mill.

2 (APP, Herb. Salerno)

** ***Tilia*** ***platyphyllos*** Scop. subsp. ***cordifolia*** (Besser) C.K.Schneid.

16 (APP, MSNM)

Resedaceae

***Reseda lutea*** L. subsp. ***lutea***

2 (MRSN, PORUN, TO-HP, Herb. Gangale & Uzunov)

Brassicaceae

***Alliaria*** ***petiolata*** (M.Bieb.) Cavara & Grande

1 (Herb. Salerno), 2 (TO-HP), 15 (TO-HP)

***Arabis alpina*** L. subsp. ***alpina***

2 (TO-HP, Herb. Rizzieri Masin), 18 (TO-HP, Herb. Gangale & Uzunov)

***Arabis collina*** Ten. subsp. ***collina***

3.1 (HFLA), 4 (Herb. Rizzieri Masin), 8 (PORUN)

***Arabis hirsuta*** (L.) Scop.

4.1 (Herb. Salerno), 8 (MSNM)

***Biscutella laevigata*** L. subsp. ***laevigata***

3 (GE, HFLA, MRSN, Herb. Cancellieri, Herb. Gangale & Uzunov, Herb. Tilia), 5 (APP, HLUC), 6 (MRSN), 8 (MRSN, TO-HP), 9 (BI), 17 (Herb. Salerno), 18 (PORUN, TO-HP, Herb. Faraoni)

***Capsella bursa-pastoris*** (L.) Medik. subsp. ***bursa-pastoris***

14 (TO-HP)

***Cardamine amara*** L. subsp. ***amara***

14.1 (Herb. Rizzieri Masin)

***Cardamine asarifolia*** L.

3 (HFLA, TO-HP), 4 (PORUN, Herb. Rizzieri Masin), 6 (APP 2 exs.), 6.1 (Herb. Gangale & Uzunov), 7 (MRSN, MSNM, Herb. Faraoni, Herb. Salerno)

***Cardamine impatiens*** L. subsp. ***impatiens***

1 (MSNM, PORUN, Herb. Gangale & Uzunov, Herb. Salerno), 2 (APP, TO-HP), 15 (PORUN, TO-HP)

***Cardamine*** ***plumieri*** Vill.

4 (PORUN), 4.1 (Herb. Salerno, Herb. Soldano, Herb. Tilia), 6 (APP, MSNM)

***Cardamine*** ***resedifolia*** L.

5 (APP, MRSN, Herb. Cancellieri), 6 (Herb. Gangale & Uzunov), 7 (TO-HP)

***Draba*** ***dubia*** Suter subsp. ***dubia***

3 (TO-HP), 4.1 (Herb. Salerno, Herb. Soldano), 5 (GE, MRSN), 6 (APP 2 exs.)

***Fourraea*** ***alpina*** (L.) Greuter & Burdet

[*Arabis pauciflora* (Grimm) Garke]

2 (MSNM, Herb. Gangale & Uzunov), 3 (GE, PORUN, TO-HP), 13.1 (Herb. Gangale & Uzunov), 15 (MRSN)18 (Herb. Cancellieri, Herb. Faraoni)

***Hugueninia*** ***tanacetifolia*** (L.) Rchb. subsp. ***tanacetifolia***

7 (GE, MSNM)

***Kernera*** ***saxatilis*** (L.) Sweet subsp. ***saxatilis***

3 (TO-HP), 4.1 (Herb. Gangale & Uzunov, Herb. Salerno, Herb. Tilia), 5 (Herb. Cancellieri), 18 (Herb. Gangale & Uzunov, Herb. Lattanzi, Herb. Salerno)

***Noccaea*** ***caerulescens*** (J.Presl & C.Presl) F.K.Mey.

[*Thlaspi caerulescens* J.Presl. & C.Presl]

10 (MSNM), 19 (TO-HP)

***Noccaea*** ***sylvia*** (Gaudin) F.K.Mey.

[*Thlaspi sylvium* Gaudin]

3 (HFLA, MSNM, Herb. Gangale & Uzunov, Herb. Salerno, Herb. Tilia), 4 (PORUN, Herb. Lattanzi), 4.1 (Herb. Tilia), 5 (HLUC, Herb. Bovio), 6 (APP, GE, MSNM, TO-HP, Herb. Cancellieri, Herb. Faraoni), 6.1 (Herb. Gangale & Uzunov), 8 (Herb. Faraoni)

***Pseudoturritis*** ***turrita*** (L.) Al-Shehbaz

[*Arabis turrita* L.]

2 (TO-HP, Herb. Gangale & Uzunov)

***Sisymbrium*** ***austriacum*** Jacq. subsp. ***austriacum***

17 (HLUC, TO-HP, Herb. Faraoni, Herb. Gangale & Uzunov)

***Turritis*** ***glabra*** L.

[*Arabis glabra* (L.) Bernh.]

5 (APP), 8 (TO-HP)

Santalaceae

***Thesium*** ***alpinum*** L.

3 (MRSN), 4.1 (Herb. Salerno, Herb. Tilia), 5 (Herb. Cancellieri), 8 (Herb. Cancellieri), 15 (Herb. Bovio), 18 (PORUN, Herb. Gangale & Uzunov, Herb. Salerno)

***Thesium*** ***bavarum*** Schrank

16 (APP)

Plumbaginaceae

***Armeria*** ***alpina*** Willd.

6 (APP)

Polygonaceae

***Bistorta*** ***officinalis*** Delarbre

1 (HLUC, TO-HP, Herb. Cancellieri, Herb. Faraoni, Herb. Gangale & Uzunov, Herb. Tilia), 3.1 (HFLA), 5 (TO-HP), 12 (PORUN)

***Bistorta*** ***vivipara*** (L.) Delarbre

1 (HLUC), 3 (TO-HP, Herb. Salerno), 3.1 (HFLA), 4 (PORUN, Herb. Faraoni), 4.1 (Herb. Cancellieri, Herb. Tilia), 5 (HLUC, MRSN, Herb. Gangale & Uzunov), 18 (Herb. Salerno, TO-HP)

***Koenigia alpina*** (All.) T.M.Schust. & Reveal

[*Aconogonum alpinum* (All.) Schur]

5 (Herb. Salerno), 6 (Herb. Cancellieri, Herb. Faraoni), 7 (APP)

***Rumex*** ***acetosa*** L. subsp. ***acetosa***

3 (MRSN), 9 (BI)

***Rumex*** ***acetosella*** L. subsp. ***acetosella***

8 (HLUC, Herb. Salerno), 14 (MSNM), 15 (APP, HLUC)

***Rumex*** ***alpinus*** L.

6 (MSNM)

***Rumex*** ***arifolius*** All.

[*Rumex alpestris* Jacq.]

3 (MSNM), 4 (PORUN), 7 (MRSN), 8 (TO-HP)

***Rumex*** ***obtusifolius*** L. subsp. ***obtusifolius***

1 (MRSN), 2 (APP)

***Rumex*** ***scutatus*** L. subsp. ***scutatus***

2 (APP, HFLA, HLUC, PORUN, Herb. Cancellieri, Herb. Faraoni, Herb. Gangale & Uzunov, Herb. Salerno, Herb. Tilia), 3 (Herb. Salerno), 4 (PORUN), 5 (MRSN), 6 (TO-HP), 8 (Herb. Rizzieri Masin), 18 (PORUN, TO-HP)

Droseraceae

***Drosera*** ***rotundifolia*** L.

8.1 (TO-HP, Herb. Gangale & Uzunov)

Caryophyllaceae

***Arenaria*** ***grandiflora*** L. subsp. ***grandiflora***

6 (APP)

***Arenaria*** ***serpyllifolia*** L. subsp. ***serpyllifolia***

4 (PORUN), 4.1 (Herb. Tilia), 5 (Herb. Cancellieri, Herb. Gangale & Uzunov), 6 (TO-HP), 12 (HFLA, Herb. Gangale & Uzunov), 17 (HLUC)

***Atocion rupestre*** (L.) Oxelman

[*Silene rupestris* L.]

1 (Herb. Rizzieri Masin), 2 (APP, HFLA, PORUN, Herb. Cancellieri, Herb. Faraoni 2 exs., Herb. Gangale & Uzunov, Herb. Salerno), 3 (TO-HP), 4.1 (Herb. Salerno), 8 (PORUN, TO-HP, Herb. Cancellieri, Herb. Gangale & Uzunov, Herb. Rizzieri Masin), 15 (PORUN, TO-HP, Herb. Gangale & Uzunov), 16 (PORUN), 17 (HLUC)

***Cerastium arvense*** L. subsp. ***strictum*** Gaudin

4 (MRSN, Herb. Rizzieri Masin), 4.1 (Herb. Salerno), 6 (MSNM), 7 (APP)

***Cerastium*** ***holosteoides*** Fr.

1 (MRSN), 4 (BI, PORUN, Herb. Lattanzi), 5 (TO-HP), 6 (MSNM, TO-HP)

***Cerastium*** ***lineare*** All.

5 (Herb. Bovio, Herb. Soldano), 6 (HLUC)

***Cherleria*** ***laricifolia*** (L.) Iamonico subsp. ***laricifolia***

[*Minuartia laricifolia* (L.) Schinz & Thell. subsp. *laricifolia*]

1 (TO-HP), 2 (APP 2 exs., GE, HFLA, HLUC, MRSN, MSNM, PORUN, TO-HP, Herb. Cancellieri, Herb. Faraoni, Herb. Gangale & Uzunov, Herb. Rizzieri Masin), 3 (GE, HFLA, MSNM, PORUN, Herb. Cancellieri, Herb. Gangale & Uzunov, Herb. Rizzieri Masin, Herb. Tilia), 4 (BI, PORUN, Herb. Faraoni, Herb. Lattanzi, Herb. Rizzieri Masin), 4.1 (Herb. Tilia), 5 (MRSN), 6 (APP), 7 (Herb. Salerno), 8 (Herb. Gangale & Uzunov, Herb. Rizzieri Masin)

***Cherleria*** ***sedoides*** L.

[*Minuartia sedoides* (L.) Hiern.]

6 (Herb. Gangale & Uzunov), 7 (MRSN)

***Dianthus*** ***balbisii*** Ser. subsp. ***balbisii***

2 (TO-HP)

***Dianthus*** ***carthusianorum*** L. subsp. ***carthusianorum***

2 (APP, HFLA 2 exs., MRSN, PORUN), 3.1 (APP), 5 (APP)

***Dianthus*** ***furcatus*** Balb. subsp. ***furcatus***

3 (Herb. Tilia), 5 (GE), 5 (TO-HP)

E ***Dianthus*** ***furcatus*** Balb. subsp. ***lereschii*** (Burnat) Pignatti

3 (PORUN), 3.1 (HFLA), 4 (PORUN)

***Dianthus pavonius*** Tausch

1 (Herb. Rizzieri Masin), 3 (BI, GE, HLUC, MSNM, Herb. Cancellieri, Herb. Faraoni), 3.1 (APP, HFLA), 4 (MRSN, Herb. Faraoni), 5 (APP, HLUC), 7 (Herb. Salerno), 8 (HFLA, Herb. Cancellieri)

***Dianthus seguieri*** Vill. subsp. ***seguieri***

1 (Herb. Cancellieri, Herb. Rizzieri Masin 2 exs.), 2 (HFLA, HLUC, MRSN, MSNM, Herb. Cancellieri, Herb. Faraoni, Herb. Gangale & Uzunov, Herb. Rizzieri Masin, Herb. Tilia), 5 (Herb. Bovio), 12 (Herb. Cancellieri), 16 (TO-HP)

***Dianthus sylvestris*** Wulfen subsp. ***sylvestris***

3 (Herb. Rizzieri Masin), 3.1 (APP 2 exs.), 4.1 (Herb. Gangale & Uzunov), 5 (Herb. Faraoni), 18 (APP)

***Gypsophila*** ***repens*** L.

3 (Herb. Cancellieri, Herb. Faraoni), 3.1 (HFLA), 4 (Herb. Rizzieri Masin), 4.1 (MSNM, Herb. Gangale & Uzunov, Herb. Salerno, Herb. Tilia), 5 (APP, HLUC, Herb. Cancellieri, Herb. Salerno), 18 (TO-HP)

***Minuartia*** ***recurva*** (All.) Schinz & Thell. subsp. ***recurva***

7 (TO-HP)

***Minuartia*** ***rostrata*** (Pers.) Rchb.

4.1 (Herb. Soldano)

***Moehringia*** ***trinervia*** (L.) Clairv.

1 (GE, Herb. Gangale & Uzunov, Herb. Salerno, Herb. Tilia), 15 (TO-HP, Herb. Gangale & Uzunov)

***Sabulina*** ***verna*** (L.) Rchb. subsp. ***verna***

[*Minuartia verna* (L.) Hiern subsp. *verna*]

3 (MSNM), 4 (TO-HP, Herb. Rizzieri Masin), 4.1 (MSNM, Herb. Tilia), 5 (Herb. Cancellieri)

***Sabulina*** ***villarsii*** (Balb.) Rchb.

[*Minuartia villarii* (Balb.) Wilczek & Chenevard]

6 (APP)

***Sagina*** ***glabra*** (Willd.) Fenzl

4 (MSNM), 8 (Herb. Soldano)

***Saponaria ocymoides*** L. subsp. ***ocymoides***

2 (HLUC, PORUN, TO-HP), 4.1 (Herb. Gangale & Uzunov), 6 (HLUC), 19 (TO-HP)

***Scleranthus*** ***perennis*** L. subsp. ***perennis***

16 (Herb. Gangale & Uzunov)

***Scleranthus*** ***polycarpos*** L.

3 (Herb. Tilia), 4 (PORUN), 4.1 (Herb. Tilia), 5 (MRSN), 8 (APP, MRSN, TO-HP, Herb. Gangale & Uzunov), 13 (Herb. Cancellieri), 14 (MSNM), 15 (APP)

***Silene*** ***acaulis*** (L.) Jacq. subsp. ***bryoides*** (Jord.) Nyman

4 (MRSN)

***Silene*** ***italica*** (L.) Pers. subsp. ***italica***

18 (Herb. Salerno)

***Silene*** ***latifolia*** Poir.

[incl. *Silene latifolia* Poir. subsp. *alba* (Mill.) Greuter & Burdet]

2 (MRSN), 3 (TO-HP)

***Silene*** ***nutans*** L. subsp. ***nutans***

1 (MRSN), 2 (HFLA), 3.1 (APP), 4 (MRSN, PORUN, Herb. Faraoni, Herb. Lattanzi), 4.1 (Herb. Gangale & Uzunov 2 exs., Herb. Tilia), 4.1 (Herb. Gangale & Uzunov), 5 (Herb. Cancellieri), 6 (APP), 8 (HFLA, HLUC, Herb. Cancellieri, Herb. Faraoni 2 exs.), 16 (HLUC 3 exs., Herb. Gangale & Uzunov), 17 (Herb. Gangale & Uzunov), 18 (TO-HP, Herb. Faraoni)

***Silene*** ***saxifraga*** L.

3.1 (APP, HFLA), 4 (PORUN, Herb. Cancellieri), 4.1 (Herb. Gangale & Uzunov, Herb. Salerno, Herb. Soldano, Herb. Tilia), 5 (MRSN), 7 (APP)

***Silene*** ***vulgaris*** (Moench) Garcke subsp. ***vulgaris***

1 (MRSN), 4 (HLUC, PORUN, Herb. Rizzieri Masin), 5 (Herb. Faraoni), 7 (APP), 15 (HLUC, Herb. Gangale & Uzunov), 17 (TO-HP)

***Spergularia*** ***rubra*** (L.) J.Presl & C.Presl

8 (TO-HP), 14.1 (Herb. Rizzieri Masin)

***Stellaria*** ***alsine*** Grimm

1 (Herb. Gangale & Uzunov), 8.1 (Herb. Cancellieri, Herb. Salerno), 9 (Herb. Gangale & Uzunov, Herb. Salerno), 13 (MSNM)

***Stellaria*** ***graminea*** L.

1 (APP, MRSN, PORUN, TO-HP, Herb. Cancellieri, Herb. Faraoni, Herb. Salerno, Herb. Tilia)

***Stellaria*** ***media*** (L.) Vill. subsp. ***media***

3 (TO-HP)

Chenopodiaceae

***Blitum bonus-henricus*** (L.) Rchb.

[*Chenopodium bonus-henricus* L.]

4 (PORUN), 7 (TO-HP), 8 (TO-HP)

Balsaminaceae

***Impatiens noli-tangere*** L.

1 (APP, BI, GE, HFLA, HLUC, MRSN, PORUN, Herb. Salerno, Herb. Tilia), 16 (Herb. Salerno)

Primulaceae

***Lysimachia nummularia*** L.

1 (APP, MRSN, PORUN, Herb. Faraoni, Herb. Salerno)

***Lysimachia vulgaris*** L.

8.1 (Herb. Gangale & Uzunov)

***Primula latifolia*** Lapeyr. subsp. ***graveolens*** (Hegetschw.) Rouy

4 (Herb. Faraoni), 4.1 (Herb. Salerno), 6 (MSNM)

***Primula veris*** L. subsp. ***columnae*** (Ten.) Maire & Petitm.

[*Primula veris* L. subsp. *suaveolens* (Bertol.) Gutermann & Ehrend.]

4.1 (Herb. Gangale & Uzunov), 6 (HLUC)

***Samolus valerandi*** L.

9 (MSNM)

***Soldanella alpina*** L. subsp. ***alpina***

3 (Herb. Salerno), 7 (TO-HP)

Ericaceae

***Arctostaphylos*** ***uva-ursi*** (L.) Spreng.

3 (TO-HP), 3.1 (HFLA)

***Calluna*** ***vulgaris*** (L.) Hull

3 (PORUN, TO-HP, Herb. Gangale & Uzunov, Herb. Salerno, Herb. Tilia), 4 (MRSN, PORUN), 4.1 (Herb. Salerno), 5 (APP), 8 (HFLA, HLUC, Herb. Tilia)

***Kalmia*** ***procumbens*** (L.) Gift, Kron & Stevens ex Galasso, Banfi & F.Conti

4.1 (Herb. Salerno)

***Rhododendron*** ***ferrugineum*** L.

3 (HFLA, PORUN, Herb. Gangale & Uzunov), 4 (BI, HLUC), 4.1 (Herb. Salerno), 6 (APP, MRSN, Herb. Cancellieri, Herb. Faraoni), 18 (TO-HP)

***Vaccinium*** ***myrtillus*** L.

3 (PORUN, Herb. Faraoni, Herb. Gangale & Uzunov, Herb. Salerno), 5 (Herb. Gangale & Uzunov), 8 (HLUC, TO-HP), 9 (BI), 18 (TO-HP)

***Vaccinium*** ***uliginosum*** L. subsp. ***microphyllum*** (Lange) Tolm.

6 (TO-HP), 7 (TO-HP), 18 (APP, HFLA)

***Vaccinium*** ***vitis-idaea*** L.

3 (PORUN, TO-HP, Herb. Salerno, Herb. Tilia), 4 (PORUN), 5 (APP, Herb. Gangale & Uzunov), 8 (Herb. Cancellieri)

Rubiaceae

***Asperula cynanchica*** L. subsp. ***cynanchica***

3 (MSNM, Herb. Gangale & Uzunov, Herb. Salerno, Herb. Tilia), 3.1 (APP, HFLA), 4 (PORUN, Herb. Rizzieri Masin), 4.1 (Herb. Tilia), 5 (HLUC, Herb. Cancellieri), 6 (HLUC), 7 (Herb. Salerno)

***Cruciata glabra*** (L.) C.Bauhin ex Opiz

3 (MRSN, PORUN, Herb. Cancellieri, Herb. Faraoni, Herb. Gangale & Uzunov, Herb. Tilia), 4 (HLUC, MRSN, Herb. Lattanzi), 4.1 (Herb. Gangale & Uzunov, Herb. Salerno, Herb. Tilia), 5 (HLUC), 9 (Herb. Salerno), 12 (TO-HP), 13 (TO-HP), 18 (TO-HP)

***Galium*** ***aparine*** L.

1 (MRSN), 2 (TO-HP), 15 (TO-HP)

***Galium*** ***centroniae*** Cariot

3 (HLUC, Herb. Salerno, Herb. Tilia), 8 (MSNM), 18 (Herb. Gangale & Uzunov)

***Galium*** ***mollugo*** L. subsp. ***mollugo***

1 (MRSN), 2 (TO-HP), 17 (HLUC)

***Galium*** ***palustre*** L. subsp. ***palustre***

9 (HLUC, Herb. Gangale & Uzunov)

***Galium*** ***pumilum*** Murray

3 (PORUN, TO-HP, Herb. Gangale & Uzunov, Herb. Tilia), 4 (Herb. Lattanzi), 4.1 (Herb. Gangale & Uzunov), 5 (APP, MRSN), 6 (MRSN)

***Galium*** ***verum*** L. subsp. ***verum***

1 (MRSN, PORUN)

Gentianaceae

***Gentiana acaulis*** L.

4 (PORUN, Herb. Rizzieri Masin), 6 (TO-HP), 7 (APP, HLUC, MRSN, MSNM, Herb. Faraoni), 8 (TO-HP)

***Gentiana asclepiadea*** L.

1 (TO-HP)

***Gentiana lutea*** L. subsp. ***lutea***

4.1 (Herb. Gangale & Uzunov)

***Gentiana nivalis*** L.

6 (Herb. Gangale & Uzunov)

e ***Gentiana rostanii*** Reut. ex Verl.

7 (GE, MSNM)

***Gentiana verna*** L. subsp. ***verna***

4 (TO-HP), 4.1 (Herb. Gangale & Uzunov), 6 (Herb. Cancellieri), 7 (APP, HLUC, TO-HP, Herb. Faraoni)

***Gentianella campestris*** (L.) Börner subsp. ***campestris***

4 (Herb. Rizzieri Masin), 5 (Herb. Gangale & Uzunov), 8 (APP, GE, HFLA, TO-HP), 9 (BI), 12 (TO-HP, Herb. Salerno), 18 (APP, HLUC, PORUN, Herb. Cancellieri, Herb. Faraoni), 19 (TO-HP)

Apocynaceae

***Vincetoxicum hirundinaria*** Medik. subsp. ***hirundinaria***

2 (APP, Herb. Gangale & Uzunov, Herb. Salerno), 4 (HLUC), 15 (MRSN), 16 (TO-HP), 17 (HLUC, TO-HP)

Convolvulaceae

***Convolvulus arvensis*** L.

2 (TO-HP)

* ***Cuscuta planiflora*** Ten.

6 (MSNM)

This taxon is considered “Doubtful” in Piedmont because the only, old record was published in Fiori (1923-1929) (A. Selvaggi and D. Bouvet, pers. comm.).

Solanaceae

***Solanum dulcamara*** L.

2 (HFLA, HLUC, MRSN, TO-HP, Herb. Tilia), 16 (Herb. Gangale & Uzunov)

Boraginaceae

***Echium vulgare*** L. subsp. ***vulgare***

17 (TO-HP)

***Myosotis alpestris*** F.W.Schmidt

3 (TO-HP), 4 (GE, PORUN 2 exs.), 5 (TO-HP), 6 (APP 2 exs.)

***Myosotis arvensis*** (L.) Hill subsp. ***arvensis***

2 (TO-HP)

***Myosotis scorpioides*** L. subsp. ***scorpioides***

1 (APP 3 exs., HFLA 2 exs., MRSN, Herb. Gangale & Uzunov), 8 (TO-HP, Herb. Salerno), 8.1 (Herb. Gangale & Uzunov), 9 (APP, HLUC, PORUN 2 exs., Herb. Cancellieri, Herb. Faraoni, Herb. Gangale & Uzunov, Herb. Lattanzi, Herb. Salerno 2 exs.), 12 (Herb. Salerno), 13 (TO-HP)

***Pulmonaria australis*** (Murr) W.Sauer

3 (TO-HP)

E ***Pulmonaria vallarsae*** A.Kern. subsp. ***apennina*** (Cristof. & Puppi) L.Cecchi & Selvi

[*Pulmonaria apennina* Cristof. & Puppi]

1 (TO-HP, Herb. Soldano)

Oleaceae

***Fraxinus excelsior*** L. subsp. ***excelsior***

1 (HLUC, Herb. Gangale & Uzunov), 8 (TO-HP), 16 (TO-HP), 18 (TO-HP)

Plantaginaceae

***Digitalis grandiflora*** Mill.

4 (TO-HP), 5 (Herb. Gangale & Uzunov)

A NAT***Digitalis purpurea*** L.

15 (MSNM)

***Globularia bisnagarica*** L.

17 (PORUN), 18 (Herb. Salerno)

***Globularia cordifolia*** L.

3 (MRSN, PORUN, Herb. Gangale & Uzunov), 3.1 (APP 2 exs., HFLA), 4.1 (Herb. Gangale & Uzunov, Herb. Salerno), 5 (HLUC)

***Linaria angustissima*** (Loisel.) Borbás

2 (HFLA), 9 (HLUC), 12 (Herb. Cancellieri, Herb. Salerno), 13 (PORUN), 13.1 (Herb. Tilia)

***Plantago atrata*** Hoppe subsp. ***fuscescens*** (Jord.) Pilg.

3 (HFLA, Herb. Cancellieri, Herb. Faraoni, Herb. Rizzieri Masin, Herb. Salerno 2 exs., Herb. Tilia), 3.1 (HFLA, Herb. Bovio), 4 (MSNM, Herb. Cancellieri, Herb. Faraoni), 4.1 (Herb. Gangale & Uzunov), 5 (MRSN, TO-HP), 18 (HFLA), 19 (TO-HP)

***Plantago lanceolata*** L.

18 (TO-HP)

***Plantago major*** L.

1 (TO-HP), 2 (TO-HP), 17 (TO-HP)

***Plantago maritima*** L. subsp. ***serpentina*** (All.) Arcang.

3 (HFLA, PORUN, Herb. Cancellieri, Herb. Faraoni, Herb. Gangale & Uzunov, Herb. Rizzieri Masin, Herb. Salerno 2 exs., Herb. Tilia), 3.1 (HFLA), 4 (PORUN), 4.1 (Herb. Gangale & Uzunov 2 exs., Herb. Tilia), 5 (HLUC, MRSN, Herb. Cancellieri, Herb. Gangale & Uzunov, TO-HP), 8 (GE, HFLA, Herb. Tilia), 15 (Herb. Faraoni), 18 (HFLA, Herb. Salerno)

***Plantago media*** L. subsp. ***media***

3 (HFLA, Herb. Faraoni, Herb. Gangale & Uzunov, Herb. Salerno), 4 (PORUN), 5 (HLUC, Herb. Gangale & Uzunov), 18 (TO-HP)

***Veronica allionii*** Vill.

3 (GE, HFLA, HLUC, MRSN, MSNM, TO-HP, Herb. Cancellieri, Herb. Salerno, Herb. Tilia), 4 (BI, HLUC, Herb. Faraoni), 5 (APP), 6 (HLUC, Herb. Gangale & Uzunov), 7 (MRSN), 8 (APP, HLUC, TO-HP, Herb. Cancellieri, Herb. Faraoni), 19 (TO-HP)

***Veronica alpina*** L.

6 (no *exsiccatum* photo by Rosati), 7 (APP)

***Veronica aphylla*** L. subsp. ***aphylla***

18 (Herb. Gangale & Uzunov)

***Veronica arvensis*** L.

3 (Herb. Tilia), 4 (PORUN), 5 (MRSN), 6 (Herb. Cancellieri)

***Veronica beccabunga*** L.

4 (TO-HP)

***Veronica chamaedrys*** L. subsp. ***chamaedrys***

1 (MRSN, Herb. Gangale & Uzunov), 4 (HLUC, PORUN, TO-HP), 4.1 (Herb. Gangale & Uzunov), 5 (APP, MRSN), 6 (APP), 8 (Herb. Faraoni), 15 (MRSN), 18 (Herb. Cancellieri, Herb. Gangale & Uzunov)

***Veronica fruticans*** Jacq.

3 (Herb. Salerno), 5 (Herb. Gangale & Uzunov), 8 (APP, MRSN, MSNM, PORUN, Herb. Cancellieri, Herb. Rizzieri Masin)

***Veronica officinalis*** L.

1 (BI, MSNM, PORUN, Herb. Faraoni), 3 (HFLA, PORUN, Herb. Faraoni, Herb. Gangale & Uzunov, Herb. Salerno, Herb. Tilia), 4 (PORUN), 4.1 (Herb. Salerno), 8 (TO-HP, Herb. Cancellieri, Herb. Faraoni, Herb. Gangale & Uzunov), 13.1 (HFLA), 15 (HLUC, PORUN, TO-HP, Herb. Cancellieri, Herb. Faraoni), 18 (Herb. Cancellieri, Herb. Gangale & Uzunov), 19 (Herb. Gangale & Uzunov)

A NAT ***Veronica persica*** Poir.

5 (MRSN)

***Veronica serpyllifolia*** L.

7 (TO-HP), 8 (MRSN, Herb. Salerno), 9 (BI, MSNM, Herb. Faraoni, Herb. Gangale & Uzunov), 15 (Herb. Gangale & Uzunov), 18 (Herb. Cancellieri, Herb. Faraoni)

***Veronica urticifolia*** Jacq.

1 (APP, GE, Herb. Faraoni, Herb. Rizzieri Masin, Herb. Salerno, Herb. Tilia)

***Veronica verna*** L. subsp. ***verna***

8 (Herb. Gangale & Uzunov), 18 (Herb. Soldano)

Scrophulariaceae

***Scrophularia hoppei*** W.D.J.Koch

4 (PORUN, Herb. Rizzieri Masin), 5 (GE), 6 (MRSN), 12 (TO-HP)

***Scrophularia nodosa*** L.

1 (Herb. Gangale & Uzunov), 2 (APP, HFLA, HLUC, MRSN, TO-HP), 15 (TO-HP)

***Verbascum lychnitis*** L.

4.1 (Herb. Gangale & Uzunov), 8 (TO-HP), 9 (HLUC), 13.1 (TO-HP)

***Verbascum thapsus*** L. subsp. ***montanum*** (Schrad.) Bonnier & Layens

4.1 (Herb. Gangale & Uzunov)

Lamiaceae

***Ajuga genevensis*** L.

4 (Herb. Faraoni), 4.1 (Herb. Salerno), 8 (APP, TO-HP), 12 (Herb. Cancellieri, Herb. Gangale & Uzunov)

***Ajuga pyramidalis*** L.

3 (MRSN), 7 (MRSN), 17 (HLUC)

***Ajuga reptans*** L.

13.1 (Herb. Gangale & Uzunov)

***Betonica hirsuta*** L.

[*Stachys pradica* (Zanted.) Greuter & Pignatti]

3 (TO-HP, Herb. Faraoni, Herb. Rizzieri Masin), 3.1 (HFLA), 4 (Herb. Rizzieri Masin), 4.1 (MSNM, Herb. Gangale & Uzunov, Herb. Salerno, Herb. Tilia), 5 (APP, GE, HLUC, MRSN, Herb. Cancellieri), 8 (Herb. Rizzieri Masin), 9 (HLUC), 12 (Herb. Cancellieri)

***Clinopodium alpinum*** (L.) Merino subsp. ***alpinum***

[*Acinos alpinus* (L.) Moench subsp. *alpinus*]

3.1 (HFLA), 4 (BI, MRSN, TO-HP), 4.1 (Herb. Gangale & Uzunov), 5 (APP, HLUC, MRSN, Herb. Gangale & Uzunov), 8 (HLUC)

***Clinopodium grandiflorum*** (L.) Kuntze

[*Calamintha grandiflora* (L.) Moench]

2 (APP, HLUC, MRSN, MSNM, PORUN, TO-HP, Herb. Faraoni, Herb. Gangale & Uzunov, Herb. Salerno)

***Clinopodium vulgare*** L. subsp. ***vulgare***

8 (HLUC), 12 (Herb. Gangale & Uzunov)

***Galeopsis tetrahit*** L.

1 (APP, PORUN, Herb. Rizzieri Masin, Herb. Salerno), 8 (Herb. Rizzieri Masin), 12 (HFLA, PORUN), 13 (HLUC), 13.1 (APP, TO-HP, Herb. Faraoni, Herb. Gangale & Uzunov, Herb. Tilia), 14 (Herb. Rizzieri Masin), 15 (APP, HLUC, MRSN, PORUN, Herb. Cancellieri, Herb. Gangale & Uzunov, Herb. Salerno), 16 (Herb. Gangale & Uzunov), 18 (PORUN, Herb. Cancellieri, Herb. Gangale & Uzunov)

***Lamium*** ***galeobdolon*** (L.) L. subsp. ***flavidum*** (F.Herm.) A.Löve & D.Löve

2 (APP), 16 (Herb. Gangale & Uzunov 2 exs., Herb. Salerno), 17 (HLUC), 18 (PORUN, Herb. Gangale & Uzunov)

***Prunella*** ***grandiflora*** (L.) Scholler

5 (Herb. Gangale & Uzunov)

***Prunella*** ***laciniata*** (L.) L.

4 (HLUC, Herb. Faraoni), 5 (Herb. Gangale & Uzunov), 8 (BI, HLUC, MRSN 2 exs.), 10 (MSNM), 17 (TO-HP)

***Prunella*** ***vulgaris*** L. subsp. ***vulgaris***

1 (MRSN), 3 (MRSN), 4 (Herb. Faraoni), 5 (Herb. Gangale & Uzunov), 8 (TO-HP), 9 (PORUN), 18 (HFLA)

***Salvia*** ***pratensis*** L. subsp. ***pratensis***

16 (APP), 17 (TO-HP, Herb. Gangale & Uzunov)

***Stachys*** ***recta*** L. subsp. ***recta***

4.1 (Herb. Gangale & Uzunov)

***Stachys*** ***sylvatica*** L.

1 (MRSN, Herb. Faraoni, Herb. Salerno), 8 (HLUC)

***Teucrium*** ***chamaedrys*** L. subsp. ***chamaedrys***

2 (HFLA, TO-HP, Herb. Gangale & Uzunov), 16 (APP)

***Teucrium*** ***montanum*** L.

2 (HLUC), 3.1 (HFLA), 4.1 (Herb. Gangale & Uzunov, Herb. Salerno), 5 (APP)

***Teucrium*** ***scorodonia*** L.

2 (HFLA, HLUC, MRSN, Herb. Rizzieri Masin), 15 (HLUC, TO-HP, Herb. Faraoni), 16 (PORUN, TO-HP, Herb. Gangale & Uzunov)

***Thymus*** ***praecox*** Opiz subsp. ***polytrichus*** (A.Kern ex Borbás) Jalas

3.1 (APP 2 exs.), 4.1 (Herb. Gangale & Uzunov), 6 (APP 6 exs.)

The specimen collected in the site 4.1 is doubtfully referable to this taxon.

***Thymus*** ***pulegioides*** L. var.***pulegioides***

[*T. chamaedrys* Fr., incl *T. pulegioides* subsp. *montanus* (Benth.) Ronniger, *T. alpestris* auct. Fl. Ital.]

1 (APP, PORUN), 2 (APP, HLUC), 3 (HLUC, PORUN), 3.1 (HFLA), 4 (MRSN), 5 (APP), 7 (MRSN), 8 (TO-HP, Herb. Gangale & Uzunov), 16 (APP)

***Thymus*** ***pulegioides*** L. var.***vestitus*** (Lange) Jalas

[*T. lanuginosus* Mill., *T. pannonicus* All., *T. froelichianus* Opiz, *T. carniolicus* Borbàs ex Déségl., *T. valderius* Ronniger]

2 (HFLA), 8 (APP 2 exs., HFLA, HLUC, PORUN), 9 (APP), 15 (APP)

Orobanchaceae

***Bartsia*** ***alpina*** L.

6 (Herb. Faraoni)

***Euphrasia*** ***alpina*** Lam.

6 (Herb. Cancellieri)

***Euphrasia*** ***salisburgensis*** Funk ex Hoppe

4 (HFLA), 4.1 (Herb. Gangale & Uzunov), 18 (PORUN)

***Euphrasia*** ***stricta*** D.Wolff ex J.F.Lehm.

[incl. *Euphrasia pectinata* Ten.]

8 (APP), 9 (APP)

The specimens are not developed enough to have all the characters for a certain differentiation from *E. pectinata* Ten. (M. Martignoni, pers. comm.). However, neither Conti et al. (2005, 2007) nor Bartolucci et al. (2018) recognize *E. pectinata* as a separate species.

E ***Melampyrum*** ***italicum*** (Beauverd) Soó

1 (Herb. Rizzieri Masin), 15 (APP, HLUC, MRSN, PORUN, TO-HP, Herb. Bovio, Herb. Faraoni, Herb. Gangale & Uzunov, Herb. Salerno), 16 (HFLA)

***Orobanche*** ***alba*** Stephan ex Willd.

3.1 (APP)

***Orobanche*** ***caryophyllacea*** Sm.

4.1 (Herb. Soldano)

***Orobanche*** ***gracilis*** Sm.

3.1 (APP), 5 (HLUC)

***Orobanche*** ***teucrii*** Holandre

3.1 (APP)

***Pedicularis*** ***gyroflexa*** Vill.

3 (HFLA, TO-HP, Herb. Gangale & Uzunov), 3.1 (HFLA), 4 (BI, MRSN, MSNM, PORUN 2 exs., Herb. Faraoni), 4.1 (MSNM, TO-HP), 5 (APP 3 exs., HLUC, Herb. Gangale & Uzunov), 6 (APP 3 exs., HLUC)

***Pedicularis*** ***kerneri*** Dalla Torre

6 (APP), 7 (TO-HP)

***Rhinanthus*** ***alectorolophus*** (Scop.) Pollich subsp. ***alectorolophus***

15 (TO-HP), 17 (BI, TO-HP), 18 (HLUC), 19 (TO-HP)

***Rhinanthus*** ***glacialis*** Personnat subsp. ***glacialis***

3 (Herb. Faraoni), 4 (MRSN), 5 (APP, HFLA), 15 (APP, TO-HP, Herb. Gangale & Uzunov), 18 (HLUC)

***Rhinanthus*** ***minor*** L.

3 (TO-HP), 18 (HFLA, TO-HP)

***Rhinanthus*** ***pumilus*** (Sterneck) Pau

3 (Herb. Gangale & Uzunov), 4 (HFLA, PORUN, Herb. Cancellieri), 5 (HLUC, Herb. Faraoni)

Lentibulariaceae

***Pinguicula*** ***leptoceras*** Rchb.

[incl. *Pinguicula arvetii* Genty]

3 (PORUN), 3.1 (APP), 6 (APP), 7 (MRSN, GE)

The specialist of the genus *Pinguicula* P. Zaccara considers *P. leptoceras* and *P. arvetii* Genty distinct taxa. The specimens indicated with “” are identified as *Pinguicula arvetii*. Yet, the nomenclature and taxonomy of the name *P. arvetii* Genty require further studies (De Castro et al. 2016, Bartolucci et al. 2018). The specimen collected in the site 7 (GE) is doubtfully referable to this taxon.

***Pinguicula*** ***vulgaris*** L. subsp. ***vulgaris***

3.1 (HFLA), 6 (APP 2 exs., MSNM), 8 (APP), 17 (HLUC), 18 (HFLA)

The specimen collected in the site 3.1 is doubtfully referable to this taxon.

Campanulaceae

***Campanula*** ***barbata*** L.

8 (APP)

***Campanula*** ***cochleariifolia*** Lam.

6 (APP, MRSN)

E ***Campanula*** ***elatines*** L.

2 (MRSN, MSNM, PORUN, TO-HP, Herb. Faraoni, Herb. Rizzieri Masin, Herb. Tilia), 4.1 (Herb. Salerno), 5 (MRSN), 14 (BI), 15 (HLUC, PORUN, TO-HP, Herb. Salerno)

***Campanula*** ***glomerata*** L.

1 (APP, BI, Herb. Rizzieri Masin, Herb. Tilia), 2 (TO-HP), 3 (TO-HP), 4.1 (Herb. Gangale & Uzunov 2 exs.), 5 (MRSN 2 exs.)

***Campanula*** ***persicifolia*** L. subsp. ***persicifolia***

5 (HLUC), 17 (BI)

***Campanula*** ***rapunculoides*** L. subsp. ***rapunculoides***

2 (HLUC)

***Campanula*** ***scheuchzeri*** Vill. subsp. ***scheuchzeri***

1 (APP, Herb. Gangale & Uzunov), 3 (HLUC, MRSN, Herb. Gangale & Uzunov), 4 (Herb. Faraoni), 5 (MRSN, Herb. Gangale & Uzunov), 8 (MRSN, Herb. Cancellieri, Herb. Faraoni), 9 (HLUC 2 exs., PORUN), 12 (MRSN)

***Campanula*** ***spicata*** L.

3.1 (APP, HFLA), 4.1 (MSNM, Herb. Tilia), 5 (HLUC, MRSN), 18 (APP 4 exs.)

***Campanula*** ***stenocodon*** Boiss. & Reut.

4.1 (Herb. Gangale & Uzunov), 5 (MRSN), 6 (GE), 7 (APP)

***Campanula*** ***trachelium*** L. subsp. ***trachelium***

2 (MRSN), 16 (HLUC)

***Jasione*** ***montana*** L.

16 (APP, HLUC, MRSN, PORUN, TO-HP)

***Phyteuma*** ***betonicifolium*** Vill.

2 (APP, HFLA, MRSN, Herb. Rizzieri Masin), 3 (HFLA, MRSN, Herb. Faraoni, Herb. Gangale & Uzunov), 3.1 (HFLA), 5 (APP, MRSN, Herb. Cancellieri), 8 (APP, HLUC, MRSN, TO-HP, Herb. Cancellieri, Herb. Faraoni), 12 (MRSN), 15 (HLUC, MRSN 2 exs.)

***Phyteuma*** ***globulariifolium*** Sternb. & Hoppe subsp. ***pedemontanum*** (Rich.Schulz) Becherer

3 (PORUN)

***Phyteuma*** ***hemisphaericum*** L.

4 (MRSN, Herb. Faraoni, Herb. Rizzieri Masin), 5 (no *exsiccatum* photo by Rosati), 6 (GE)

***Phyteuma*** ***michelii*** All.

[incl. *Phyteuma scorzonerifolium* Vill.]

4 (HLUC), 15 (Herb. Gangale & Uzunov), 16 (APP, HFLA, HLUC, MRSN, MSNM, PORUN, Herb. Gangale & Uzunov)

***Phyteuma*** ***ovatum*** Honck. subsp. ***ovatum***

1 (APP, HFLA), 17 (BI, HLUC), 18 (APP, HFLA, PORUN, TO-HP, Herb. Cancellieri, Herb. Faraoni, Herb. Gangale & Uzunov)

***Phyteuma*** ***spicatum*** L. subsp. ***spicatum***

2 (HFLA), 8 (Herb. Salerno)

Asteraceae

***Achillea*** ***collina*** (Becker ex Wirtg.) Heimerl

1 (MRSN), 8 (APP), 9 (HLUC)

***Achillea*** ***collina*** (Becker ex Wirtg.) Heimerl morphotype

1 (TO-HP), 2 (APP, BI 2 exs., MSNM, Herb. Gangale & Uzunov), 8 (HLUC, TO-HP), 9 (BI, HLUC), 12 (Herb. Gangale & Uzunov), 13.1 (APP), 15 (APP)

These specimens have some morphological characters of *A. collina*, but proazulenes are absent; it’s probably a hybrid form with *A. millefolium* L. or with *A. roseoalba* Ehrend. (pink flowers) (M. Buccheri, V. Casolo, F. Martini, pers. comm.).

***Achillea*** ***millefolium*** L. subsp. ***millefolium***

1 (APP), 8 (MSNM)

The specimen collected in the site 1 is doubtfully referable to this taxon (indicated as *A.* *millefolium* L. *s.l*.).

***Adenostyles*** ***alliariae*** (Gouan) A.Kern.

6 (HLUC, MRSN)

***Adenostyles*** ***alpina*** (L.) Bluff & Fingerh. subsp. ***alpina***

6.1 (Herb. Gangale & Uzunov)

***Antennaria*** ***carpatica*** (Wahlenb.) Bluff & Fingerh. subsp. ***helvetica*** (Chrtek & Pouzar) Chrtek & Pouzar

[incl. *Antennaria carpatica* (Wahlenb.) Bluff & Fingerh. subsp. *amphilanata* Chrtek & Pouzar]

3 (MSNM, Herb. Tilia), 4.1 (Herb. Tilia), 5 (APP), 8 (Herb. Tilia)

***Antennaria*** ***dioica*** (L.) Gaertn.

3 (MRSN, PORUN, Herb. Faraoni, Herb. Gangale & Uzunov 2 exs., Herb. Salerno 2 exs., Herb. Tilia), 4 (BI, HLUC, PORUN, Herb. Cancellieri, Herb. Faraoni), 4.1 (Herb. Salerno, Herb. Tilia), 6 (HLUC, Herb. Gangale & Uzunov), 7 (MRSN), 8 (HLUC, TO-HP, Herb. Salerno)

***Arnica*** ***montana*** L. subsp. ***montana***

3 (HFLA, PORUN, Herb. Faraoni 2 exs.), 4 (MRSN), 6 (HLUC), 8 (Herb. Cancellieri, Herb. Faraoni, Herb. Salerno), 18 (HFLA), 19 (BI)

***Artemisia*** ***absinthium*** L.

2 (TO-HP, Herb. Faraoni)

***Artemisia*** ***vulgaris*** L.

2 (Herb. Faraoni, TO-HP), 18 (TO-HP)

***Aster*** ***alpinus*** L. subsp. ***alpinus***

3 (TO-HP), 3.1 (HFLA), 5 (APP, Herb. Gangale & Uzunov, Herb. Salerno), 6 (Herb. Faraoni)

***Bellidiastrum*** ***michelii*** Cass.

3 (Herb. Salerno), 3.1 (HFLA), 4.1 (Herb. Salerno), 18 (Herb. Gangale & Uzunov 2 exs.)

***Buphthalmum*** ***salicifolium*** L. *s.l.*

3 (TO-HP), 3.1 (APP), 4.1 (Herb. Gangale & Uzunov), 15 (TO-HP)

The specimens’ fruits are not developed enough to permit to distinguish between *B. salicifolium* L. subsp. *flexile* (Bertol.) Garbari and subsp. *salicifolium*, although the separation of these entities seems to be weak. The revision of the specimens kept in TO-HP points out the existence of individuals of the nominal subspecies and of morphotypes with intermediate characters between the two subspecies; thus the presence of the subsp. *flexile* in Piedmont remains uncertain (D. Bouvet and A. Selvaggi, pers. comm.).

***Carduus*** ***defloratus*** L. subsp. ***defloratus***

3 (HFLA), 4 (BI, TO-HP), 4.1 (Herb. Gangale & Uzunov 2 exs.), 5 (HLUC, Herb. Cancellieri), 20 (MSNM)

The specimen collected in the site 20 is doubtfully referable to this taxon (indicated as*C.* *defloratus* L. *s.l*.).

***Carduus*** ***personata*** (L.) Jacq. subsp. ***personata***

1 (HFLA, Herb. Rizzieri Masin)

***Centaurea*** ***nervosa*** Willd. subsp. ***nervosa***

[*Centaurea uniflora* Turra subsp*. nervosa* (Willd.) Bonnier & Layens]

2 (HLUC), 5 (Herb. Salerno), 8 (MRSN, TO-HP)

Probably some specimens are hybrids between *C. nervosa* (also considered a subspecies of *C. uniflora*) and *C. uniflora* Turra.

***Centaurea*** ***nigrescens*** Willd. subsp. ***transalpina*** (Schleich ex DC.) Nyman

1 (APP 4 exs., MRSN, TO-HP, Herb. Salerno), 8 (HLUC), 16 (APP 2 exs., HLUC)

The specimens’ flower heads are not enough developed to permit a certain distinction between the nominal subspecies *C. nigrescens* subsp. *nigrescens* and the subsp. *transalpina*. Usually on the Alps the subsp. *transalpina* replaces the subsp. *nigrescens* at about 800-1000 m a.s.l. These specimens have been collected around this altitude (M. Barbo, pers. comm.).

The specimens collected in the site 1 are doubtfully referable to this taxon.

*** *Centaurea*** ***scabiosa*** L. subsp. ***alpestris*** (Hegetschw.) Nyman

3.1 (APP), 17 (APP 2 exs., TO-HP, Herb. Gangale & Uzunov, Herb. Salerno)

It is considered “Not confirmed” in Piedmont, because all literature records refer to a generic data for the Alps reported in Fiori and Paoletti (1903-1904) (A. Selvaggi, pers. comm.).

***Centaurea*** ***triumfetti*** All.

[*Cyanus triumfetti* (All.) Dostál ex Á. & D. Löve]

3.1 (APP, HFLA), 4.1 (Herb. Gangale & Uzunov), 5 (TO-HP)

***Centaurea*** ***uniflora*** Turra

4 (BI, HFLA, PORUN, Herb. Rizzieri Masin), 5 (APP, HLUC, MRSN, TO-HP, Herb. Bovio, Herb. Faraoni, Herb. Gangale & Uzunov), 6 (MSNM, Herb. Cancellieri), 12 (Herb. Gangale & Uzunov)

***Cicerbita*** ***alpina*** (L.) Wallr.

[*Lactuca alpina* (L.) A. Gray]

3 (TO-HP)

***Cirsium*** ***alsophilum*** (Pollini) Soldano

1 (APP 3 exs., HFLA, MSNM), 6 (APP)

***Cirsium*** ***erisithales*** (Jacq.) Scop.

1 (APP, HLUC, Herb. Cancellieri, Herb. Gangale & Uzunov, Herb. Tilia)

***Cirsium*** ***palustre*** (L.) Scop.

1 (APP), 8 (Herb. Salerno), 8.1 (Herb. Gangale & Uzunov), 9 (BI, HLUC, PORUN), 13 (HFLA, HLUC)

***Cirsium*** ***spinosissimum*** (L.) Scop.

7 (TO-HP)

***Crepis*** ***alpestris*** (Jacq.) Tausch

3 (TO-HP)

***Crepis*** ***conyzifolia*** (Gouan) A. Kern.

4 (TO-HP), 8 (HFLA, Herb. Rizzieri Masin), 12 (Herb. Cancellieri, Herb. Gangale & Uzunov)

***Crepis*** ***paludosa*** (L.) Moench

1 (APP), 2 (TO-HP), 15 (APP, TO-HP)

***Crepis*** ***pontana*** (L.) Dalla Torre

8 (TO-HP)

***Crepis*** ***pyrenaica*** (L.) Greuter

13.1 (MSNM)

***Doronicum*** ***austriacum*** Jacq. subsp. ***austriacum***

3 (GE, MRSN), 4 (HLUC, MSNM), 4.1 (Herb. Tilia), 6 (APP), 15 (HFLA)

***Erigeron*** ***acris*** L. subsp. ***acris***

8 (HLUC, Herb. Cancellieri, Herb. Faraoni), 9 (HLUC, MRSN, TO-HP), 17 (PORUN, Herb. Salerno)

A INV ***Erigeron*** ***annuus*** (L.) Desf.

16 (Herb. Gangale & Uzunov)

***Erigeron*** ***neglectus*** A. Kern.

5 (APP)

***Erigeron*** ***uniflorus*** L.

3 (Herb. Gangale & Uzunov), 4.1 (Herb. Salerno), 5 (HLUC), 6 (TO-HP, Herb. Gangale & Uzunov), 7 (APP, MRSN, MSNM)

A INV ***Galinsoga*** ***quadriradiata*** Ruiz & Pav.

2 (PORUN, TO-HP)

***Hieracium*** ***amplexicaule*** L. subsp. ***berardianum*** (Arv.-Touv.) Zahn

2 (GE, HFLA, HLUC, MRSN, MSNM, PORUN, TO-HP 2 exs., Herb. Gangale & Uzunov), 4 (Herb. Soldano)

***Hieracium*** ***bifidum*** Kit. ex Hornem. *s.l.*

3.1 (HFLA), 4.1 (Herb. Soldano), 5 (Herb. Gangale & Uzunov)

***Hieracium*** ***dasytrichum*** Arv.-Touv. *s.l.*

5 (Herb. Faraoni)

***Hieracium*** ***dentatum*** Hoppe *s.l.*

3 (TO-HP), 4.1 (MSNM, Herb. Soldano), 5 (Herb. Gangale & Uzunov), 18 (Herb. Soldano)

***Hieracium*** ***glaucinum*** Jord. *s.l.*

8 (MSNM), 16 (MSNM)

***Hieracium*** ***lachenalii*** Suter *s.l.*

8 (Herb. Soldano), 15 (TO-HP)

The specimen collected in the site 15 is untypical, therefore the identification is uncertain (G. Gottschlich, pers. comm.).

***Hieracium*** ***murorum*** L. *s.l.*

1 (MSNM), 2 (HFLA, PORUN), 3 (MSNM, TO-HP, Herb. Gangale & Uzunov), 13.1 (HFLA), 16 (MSNM, Herb. Gangale & Uzunov), 18 (PORUN)

***Hieracium*** ***obscuratum*** Murr *s.l.*

[*Hieracium haematopodum* Zahn (nom. illeg.)]

15 (Herb. Gangale & Uzunov)

***Hieracium*** ***piliferum*** Hoppe subsp. ***hololeptum*** (Nägeli & Peter) Zahn

7 (MRSN)

This subspecies wasn’t reported in Conti et al. (2005, 2007).

e ***Hieracium*** ***piliferum*** Hoppe subsp. ***subnivale*** (Gren. & Godr.) Zahn

3.1 (HFLA), 4.1 (Herb. Gangale & Uzunov)

This subspecies wasn’t reported in Conti et al. (2005, 2007).

***Hieracium*** ***pilosum*** Schleich. ex Froel. *s.l.*

3.1 (HFLA)

***Hieracium*** ***ramosissimum*** Schleich. ex Hegetschw. *s.l.*

2 (HFLA)

***Hieracium*** ***scorzonerifolium*** Vill. *s.l.*

3 (TO-HP), 4.1 (Herb. Gangale & Uzunov)

***Hieracium*** ***tenuiflorum*** Arv.-Touv. *s.l.*

15 (PORUN)

***Hieracium*** ***valdepilosum*** Vill. *s.l.*

18 (TO-HP)

***Hieracium*** ***villosum*** Jacq. *s.l.*

3.1 (HFLA)

***Homogyne*** ***alpina*** (L.) Cass.

3 (Herb. Gangale & Uzunov, Herb. Salerno), 7 (MRSN, Herb. Faraoni, Herb. Salerno), 18 (Herb. Gangale & Uzunov, Herb. Salerno)

***Hypochaeris*** ***maculata*** L.

13.1 (MSNM)

***Hypochaeris*** ***radicata*** L.

8 (HFLA)

***Hypochaeris*** ***uniflora*** Vill.

4 (BI, PORUN), 6 (HLUC, MRSN), 7 (APP), 8 (HFLA)

***Inula*** ***britannica*** L. subsp. ***britannica***

3.1 (HFLA)

***Jacobaea*** ***incana*** (L.) Veldkamp

[*Senecio incanus* L. subsp. *incanus*]

3 (TO-HP), 4 (PORUN, Herb. Rizzieri Masin), 6 (TO-HP, Herb. Gangale & Uzunov), 7 (APP, MRSN, MSNM, Herb. Cancellieri, Herb. Faraoni, Herb. Salerno)

***Lactuca*** ***virosa*** L.

2 (MSNM)

***Lapsana*** ***communis*** L. subsp. ***communis***

15 (MRSN)

***Leontodon*** ***hispidus*** L. subsp. ***hispidus***

3 (HFLA), 3.1 (APP), 6 (Herb. Cancellieri), 8 (Herb. Gangale & Uzunov), 14 (TO-HP), 18 (HFLA)

***Leucanthemopsis*** ***alpina*** (L.) Heywood subsp. ***alpina***

6 (MSNM)

***Leucanthemum*** ***coronopifolium*** Vill. s.l.

3 (TO-HP), 4 (TO-HP, Herb. Lattanzi), 6 (Herb. Gangale & Uzunov)

Probably all the specimens are ascribable to the subsp. *ceratophylloides* (All.) Vogt & Greuter (according to R. Vogt’s revision).

***Leucanthemum*** ***coronopifolium*** Vill. subsp. ***coronopifolium***

3 (GE, MRSN, Herb. Bovio), 4 (MSNM), 5 (Herb. Gangale & Uzunov, Herb. Soldano), 6 (APP), 8 (Herb. Rizzieri Masin)

*** *Leucanthemum*** ***ircutianum*** DC. *s.l.*

1 (MRSN, MSNM, Herb. Faraoni), 2 (APP, MSNM), 3 (MRSN), 8 (TO-HP), 9 (Herb. Rizzieri Masin), 18 (HFLA)

The specimen collected in the site 18 is doubtfully referable to this taxon.

This taxon is indicated as “Not confirmed” in Piedmont, because there is no literature data dating back to the last 50 years (A. Selvaggi and D. Bouvet, pers. comm.).

A NAT ***Matricaria*** ***discoidea*** DC.

2 (PORUN, Herb. Faraoni, Herb. Salerno), 8 (MRSN, MSNM, PORUN, Herb. Cancellieri, Herb. Salerno), 14 (TO-HP)

***Mycelis*** ***muralis*** (L.) Dumort. subsp. ***muralis***

[*Lactuca muralis* (L.) Gaertn.]

15 (TO-HP), 16 (Herb. Salerno)

***Omalotheca*** ***sylvatica*** (L.) Sch.Bip. & F.W.Schultz

[*Gnaphalium sylvaticum* L.]

8 (TO-HP, Herb. Salerno), 9 (Herb. Rizzieri Masin), 15 (APP, Herb. Cancellieri), 17 (Herb. Salerno)

***Petasites*** ***hybridus*** (L.) G.Gaertn., B.Mey. & Scherb. subsp. ***hybridus***

18 (TO-HP)

* ***Picris*** ***hieracioides*** L. subsp. ***umbellata*** (Schrank) Ces.

1 (APP), 2 (PORUN)

For the identification of the specimens is taken as reference Slovák et al. (2012). It is considered “Doubtful” in Piedmont because there is only an old record in Fiori (1923-1929) and the source of the generic data published in Aeschimann et al. (2004) is unknown (A. Selvaggi and D. Bouvet, pers. comm.).

***Pilosella*** ***glacialis*** (Reyn. ex Lachen.) F.W.Schultz & Sch.Bip.

[*Hieracium angustifolium* Hoppe]

3 (TO-HP)

***Pilosella*** ***lactucella*** (Wallr.) P.D.Sell & C.West *s.l.*

[*Hieracium lactucella* Wallr.]

3 (MSNM), 4.1 (TO-HP), 18 (TO-HP)

***Pilosella*** ***laggeri*** (Sch.Bip. ex Rchb.f.) F.W.Schultz & Sch.Bip.

[*Hieracium laggeri* (Sch.Bip. ex Rchb. f.) Fr.]

5 (Herb. Soldano)

***Pilosella*** ***officinarum*** Vaill.

[*Hieracium pilosella* L.]

3 (GE, PORUN, TO-HP 2 exs.), 4 (MRSN, PORUN), 8 (HLUC, MRSN, PORUN)

***Pilosella*** ***piloselloides*** (Vill.) Soják *s.l.*

[*Hieracium piloselloides* Vill.]

17 (TO-HP)

***Pilosella*** ***subtardans*** (Nägeli & Peter) Soják

[*Hieracium subtardans* (Naegeli & Peter) Zahn]

4 (HLUC)

***Prenanthes*** ***purpurea*** L.

16 (APP 2 exs., HFLA, PORUN, Herb. Salerno)

***Scorzoneroides*** ***autumnalis*** (L.) Moench

[*Leontodon autumnalis* L.]

3 (Herb. Gangale & Uzunov), 4 (Herb. Rizzieri Masin), 9 (MSNM), 13 (Herb. Gangale & Uzunov)

***Senecio*** ***doronicum*** (L.) L. subsp. ***doronicum***

3 (HFLA), 6 (APP, HLUC, MRSN, MSNM, Herb. Faraoni)

***Senecio*** ***viscosus*** L.

2 (APP)

***Solidago*** ***virgaurea*** L. subsp. ***minuta*** (L.) Arcang.

3 (PORUN, Herb. Faraoni), 4 (MSNM)

***Sonchus*** ***oleraceus*** L.

2 (TO-HP)

***Tanacetum*** ***parthenium*** (L.) Sch. Bip.

2 (HLUC)

** ***Taraxacum*** ***panalpinum*** Soest

7 (MSNM)

***Taraxacum*** sect. ***alpina*** G.E. Haglund

8 (Herb. Rizzieri Masin)

***Tephroseris*** ***integrifolia*** (L.) Holub subsp. ***capitata*** (Wahlenb.) B.Nord.

3 (TO-HP), 4.1 (Herb. Gangale & Uzunov, Herb. Soldano)

***Tolpis*** ***staticifolia*** (All.) Sch.Bip.

17 (TO-HP)

***Tragopogon*** ***orientalis*** L.

4 (PORUN)

***Tussilago*** ***farfara*** L.

3 (Herb. Salerno), 18 (TO-HP)

Viburnaceae

***Sambucus*** ***nigra*** L.

2 (MRSN), 8 (TO-HP)

Dipsacaceae

***Knautia*** ***mollis*** Jord.

3.1 (APP 4 exs.), 4 (BI), 4.1 (MSNM, Herb. Gangale & Uzunov, Herb. Tilia), 5 (GE, HLUC, MRSN, Herb. Bovio, Herb. Cancellieri, Herb. Faraoni), 9 (HLUC, Herb. Rizzieri Masin), 12 (PORUN), 13.1 (APP 2 exs., MSNM), 16 (APP 2 exs.)

***Scabiosa*** ***columbaria*** L. *s.l.*

3.1 (APP), 4.1 (MSNM), 5 (APP)

This taxon presents a considerable variability in Italy, not well understood yet. At present, the attribution to the subspecific rank of the collected samples is not possible (F. Conti and E. Banfi, pers. comm.).

***Succisa*** ***pratensis*** Moench

8 (APP), 12 (Herb. Salerno)

Valerianaceae

***Valeriana*** ***montana*** L.

6 (APP)

***Valeriana*** ***tripteris*** L. subsp. ***tripteris***

3 (Herb. Gangale & Uzunov, TO-HP), 6 (HLUC, MRSN), 18 (Herb. Salerno)

Apiaceae

***Aegopodium*** ***podagraria*** L.

1 (MRSN, PORUN, Herb. Faraoni, Herb. Gangale & Uzunov, Herb. Salerno, Herb. Tilia)

***Angelica*** ***sylvestris*** L. subsp. ***sylvestris***

15 (MRSN, TO-HP)

***Astrantia*** ***major*** L. subsp. ***major***

1 (APP 2 exs., BI, HFLA, HLUC, MRSN, PORUN, Herb. Cancellieri, Herb. Faraoni 2 exs., Herb. Gangale & Uzunov, Herb. Salerno, Herb. Tilia), 2 (TO-HP), 3 (Herb. Gangale & Uzunov), 4 (PORUN), 18 (TO-HP)

***Astrantia*** ***minor*** L.

3 (HFLA, Herb. Cancellieri, Herb. Faraoni, Herb. Salerno, Herb. Tilia), 3.1 (TO-HP), 5 (APP, HLUC), 18 (TO-HP), 19 (TO-HP)

***Athamanta*** ***cretensis*** L.

3 (Herb. Gangale & Uzunov), 3.1 (HFLA), 4.1 (Herb. Gangale & Uzunov 2 exs.), 5 (APP), 18 (PORUN)

***Bunium*** ***bulbocastanum*** L.

2 (MSNM, Herb. Tilia), 16 (TO-HP), 17 (Herb. Gangale & Uzunov)

***Bupleurum*** ***ranunculoides*** L. subsp. ***ranunculoides***

3 (TO-HP, Herb. Cancellieri, Herb. Faraoni, Herb. Gangale & Uzunov, Herb. Salerno, Herb. Tilia), 3.1 (HFLA 2 exs.), 4 (BI, MRSN, MSNM, PORUN, Herb. Rizzieri Masin), 4.1 (Herb. Gangale & Uzunov, Herb. Salerno, Herb. Tilia), 5 (Herb. Gangale & Uzunov), 7 (HLUC)

***Bupleurum*** ***stellatum*** L.

4 (PORUN), 6 (APP, HLUC, Herb. Cancellieri, Herb. Faraoni), 6.1 (Herb. Gangale & Uzunov), 7 (Herb. Salerno), 14.1 (Herb. Rizzieri Masin), 15 (APP, HFLA)

***Carum*** ***carvi*** L.

2 (Herb. Gangale & Uzunov), 3 (Herb. Gangale & Uzunov), 4 (TO-HP, Herb. Cancellieri), 5 (Herb. Cancellieri), 18 (TO-HP)

***Chaerophyllum*** ***villarsii*** W.D.J.Koch

[*Chaerophyllum hirsutum* L. subsp. *villarsii* (W.D.J. Koch) Arcang.]

1 (APP, MRSN, PORUN, Herb. Gangale & Uzunov, Herb. Rizzieri Masin), 3 (GE, Herb. Cancellieri, Herb. Faraoni, Herb. Tilia), 4 (HLUC), 5 (MRSN, Herb. Gangale & Uzunov), 6 (MRSN), 7 (APP), 8 (TO-HP), 9 (HFLA), 13 (TO-HP), 16 (TO-HP), 17 (HLUC), 18 (PORUN, Herb. Faraoni)

***Imperatoria*** ***ostruthium*** L.

[*Peucedanum ostruthium* (L.) W.D.J. Koch]

3 (BI, TO-HP), 5 (MRSN, Herb. Gangale & Uzunov), 15 (TO-HP)

***Laserpitium*** ***gallicum*** L. subsp. ***gallicum*** var. ***angustifolium*** (L.) Lange

3.1 (APP), 17 (APP 2 exs.)

***Pimpinella*** ***saxifraga*** L. subsp. ***saxifraga***

3 (Herb. Bovio), 5 (TO-HP), 8 (APP), 10 (MSNM)

Nomenclature is according to Reduron (2008).

***Siler*** ***montanum*** L. subsp. ***montanum***

[*Laserpitium siler* L. subsp*. siler*]

17 (APP 2 exs.)

***Trinia*** ***glauca*** (L.) Dumort. subsp. ***glauca***

3.1 (HFLA), 4.1 (Herb. Gangale & Uzunov 2 exs., Herb. Soldano), 5 (Herb. Salerno).
